# Supplementary material for: Light‐Induced Mechanistic Divergence in Gold(I) Catalysis: Revisiting the Reactivity of Diazonium Salts
Source: PubMed Central journal article supplement — Angew Chem Int Ed Engl. 2019 Oct 11;58(47):16988–93. doi: 10.1002/anie.201908268 (PMC6899485; doi:10.1002/anie.201908268), 2019-10-11
Supplement: ANIE-58-16988-s001.pdf [file ANIE-58-16988-s001.pdf]

## Supporting Information

### **Light-Induced Mechanistic Divergence in Gold(I) Catalysis: Revisiting the Reactivity of Diazonium Salts**

*Svenja Taschinski, René Döpp, Martin Ackermann, Frank Rominger, Folkert de Vries, Maximilian F. S. J. Menger, Matthias Rudolph, A. Stephen K. Hashmi,\* and Johannes E. M. N. Klein\**

anie\_201908268\_sm\_miscellaneous\_information.pdf

## Table of contents

|                                                                                                                                |     |
|--------------------------------------------------------------------------------------------------------------------------------|-----|
| 1) Experimental Section .....                                                                                                  | S1  |
| 1.1) General Remarks .....                                                                                                     | S1  |
| 1.2) General Procedures .....                                                                                                  | S3  |
| 1.2.1) General Procedure A, Sonogashira-Coupling (GP A) .....                                                                  | S3  |
| 1.2.2) General Procedure B, Synthesis of Diazonium Salts (GP B) .....                                                          | S3  |
| 1.2.3) General Procedure C, Synthesis of Azobenzofurans (GP C) .....                                                           | S4  |
| 1.3) Synthesis of Substrates .....                                                                                             | S5  |
| 1.4) Gold-Catalyzed Reactions .....                                                                                            | S9  |
| 1.4.1) General Procedure for Reaction Screening, Arylated Benzofuran .....                                                     | S9  |
| 1.4.2) General Procedure for Reaction Screening, Azobenzofuran .....                                                           | S10 |
| 1.4.3) Gold-Catalyzed Reactions, Scope of Reaction .....                                                                       | S11 |
| 1.5) Control Experiments .....                                                                                                 | S18 |
| 1.5.1) Arylated Benzofuran .....                                                                                               | S18 |
| 1.5.2) Azocompound .....                                                                                                       | S19 |
| 1.6) Synthesis of Gold(I) Complex .....                                                                                        | S21 |
| 1.6.2) Reactions of Vinyl Gold(I) Complex .....                                                                                | S22 |
| 1.7) Irradiation of $\text{Ph}_3\text{PAuCl}/\text{Ph}_3\text{PAuNTf}_2$ with <i>p</i> -Tolyldiazonium tetrafluoroborate ..... | S23 |
| 1.8) Computational Details .....                                                                                               | S27 |
| 1.8.1) Geometry Donor-Acceptor Complex .....                                                                                   | S27 |
| 1.8.2) UV-Vis Spectrum Donor-Acceptor Complex .....                                                                            | S28 |
| 1.8.3) Nature of the Excited State and Role for Reactivity .....                                                               | S29 |
| 2) Attachment .....                                                                                                            | S31 |
| 2.1) NMR Spectra .....                                                                                                         | S31 |
| 2.2) Crytallographic Data .....                                                                                                | S56 |
| 2.3) Cartesian Coordinates .....                                                                                               | S67 |
| 2.4) References .....                                                                                                          | S72 |

## 1) Experimental Section

### 1.1) General Remarks

#### Chemicals and Solvents

Chemicals and solvents were purchased from commercial suppliers (ABCR, Acros, Alfa Aesar, Chempur, Fluka, Fluorochem, Merck, Euriso-Top, BOOM and Sigma Aldrich) or obtained from the chemical store at the University of Heidelberg and the University of Groningen and used as delivered. Dry solvents were dispensed from a solvent purification system MB SPS-800 or obtained by using drying columns.<sup>[1]</sup>

#### Reactions

Reactions requiring inert conditions were carried out in heat-gun dried glassware under an atmosphere of nitrogen using standard Schlenk-techniques. For some reactions degassed solvents were used by sparging them with nitrogen for at least one hour.

#### NMR Spectroscopy (NMR)

NMR spectra were, if not mentioned otherwise, recorded at room temperature at the chemistry department of the University of Heidelberg on the following spectrometers: Bruker Avance-III-300, Bruker Avance DRX-300, Bruker Avance-III-500 and Bruker Avance-III-600 and at the University of Groningen on the following spectrometers: Varian Oxford 300, AgilentTech 400/54 Premium Shielded, Varian Oxford 500, Bruker Avance-Neo 600. Chemical shifts are given in ppm and coupling constants in Hz.  $^1\text{H}$  and  $^{13}\text{C}$  spectra were calibrated in relation to deuterated solvents, namely  $\text{CDCl}_3$  (7.26 ppm; 77.16 ppm),  $\text{CD}_2\text{Cl}_2$  (5.32 ppm; 53.84 ppm),  $\text{DMSO-d}^6$  (2.50 ppm; 39.52 ppm),  $\text{CD}_3\text{CN}$  (1.94 ppm; 118.26 ppm),  $(\text{CD}_3)_2\text{CO}$  (2.05 ppm; 206.26 ppm).<sup>[2]</sup>  $^{31}\text{P}$  spectra were calibrated in relation to the reference measurement of phosphoric acid (0.00 ppm).  $^{19}\text{F}$  spectra were calibrated in relation to the reference measurement of 1,2-difluorobenzene (-139 ppm). The following abbreviations were used for  $^1\text{H}$  NMR spectra to indicate the signal multiplicity: s (singlet), bs (broad singlet), d (doublet), t (triplet), q (quartet) and m (multiplet) as well as combinations of them. When combinations of multiplicities are given the first character noted refers to the biggest coupling constant. All  $^{13}\text{C}$  NMR spectra were measured with  $^1\text{H}$ -decoupling. The nature of the observed C atoms in these spectra is indicated as follows: [s (quaternary carbon), d (CH-group), t ( $\text{CH}_2$ -group), q ( $\text{CH}_3$ -group)] and were determined by DEPT135 spectra.

#### Mass Spectrometry (MS and HRMS)

Mass spectra were determined at the MS department of the University of Heidelberg and the Microanalytical Department of the University of Groningen.

### **Infrared Spectroscopy (IR)**

Infrared spectra were recorded on an FT-IR spectrometer named Bruker LUMOS (Heidelberg) and JASCO FT/IR-4700 (Groningen). The method is denoted in brackets. For the most significant bands the wave number  $\tilde{\nu}$  ( $\text{cm}^{-1}$ ) is given.

### **Gas Chromatography / Mass Spectrometry (GC/MS)**

GC/MS spectra were measured on the following hardware system:

Schimadzu GCMS-QP2010 Ultra Mass Selective Detector, coupled with a Schimadzu GC-2010 Plus gas chromatograph. As capillary column, an Agilent HP-5MS ((5%-Phenyl)-methylpolysiloxane, 30 m x 0.25 mm, 0.25  $\mu\text{m}$ ) was employed and helium was used as carrier gas.

### **Melting Points**

Melting points were measured in open glass capillaries in a Büchi melting point apparatus and were not corrected.

### **Flash Column Chromatography**

Flash column chromatography was accomplished using Silica gel 60 (0.04 - 0.063 mm/230 - 400 mesh ASTM) purchased from Macherey-Nagel, SiliaFlash® P60 (0.04 - 0.063 mm/230 - 400 mesh) purchased from Silicycle UltraPure Silica gels and aluminium oxide (activated, neutral, Brockmann Activity I) from Fluka. As eluents mixtures of petroleum ether (PE) and ethyl acetate (EA) or diethylether were used.

### **Analytical Thin Layer Chromatography (TLC)**

Analytical Thin Layer Chromatography was carried out on precoated Merck TLC Silica Gel 60 F<sub>254</sub> aluminium sheets or Merck TLC Aluminium oxide 60 F<sub>254</sub> aluminium sheets. Components were visualized by observation under UV-light ( $\lambda = 254 \text{ nm}$  or  $366 \text{ nm}$ ) or by treatment with an acidic solution of anisaldehyde, basic solution of vanilin or an aqueous solution of  $\text{KMnO}_4$ .

### **Photo Reactor**

The photo reactor has been designed according to a previously published standardized procedure.<sup>[3]</sup>

### **NMR Irradiation**

The irradiation inside the NMR Spectrometer was done with a THORLABS M405FP1 Fiber-Coupled LED, with the nominal wavelength of 405 nm, bandwidth of 12 nm, minimum output 19.3 mW, 1400 mA and 3.45 V.

## 1.2) General Procedures

### 1.2.1) General Procedure A, Sonogashira-Coupling (GP A)

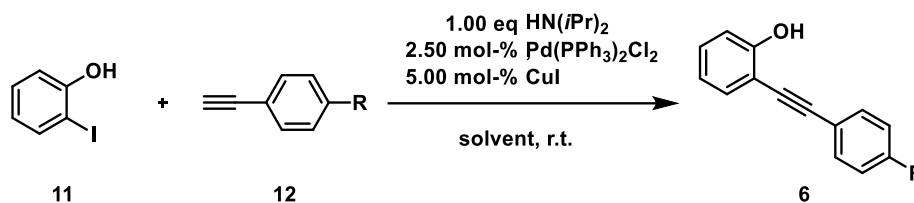

Sonogashira-coupling products were synthesized according to a modified procedure previously reported by Wegner and co-workers.<sup>[4]</sup>

To a heat-gun dried Schlenk tube under an atmosphere of nitrogen, 1.00 eq 2-iodophenol **11**, 5.00 mol-% copper(I) iodide, 2.50 mol-% Pd(PPh<sub>3</sub>)<sub>2</sub>Cl<sub>2</sub> and were dissolved in freshly degassed solvent. A small excess (1.20 eq) of alkyne **12** was added and the resulting mixture was stirred at room temperature until complete conversion was detected by TLC. The mixture was diluted with water and the phases were separated. The aqueous layer was extracted three times with ethylacetate, the combined organic layers were separated, dried over sodium sulfate and evaporated onto Celite<sup>®</sup>. The crude products **6** were purified by flash column chromatography.

### 1.2.2) General Procedure B, Synthesis of Diazonium Salts (GP B)

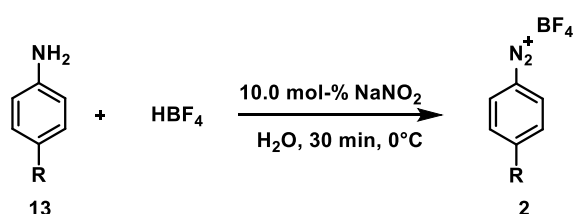

Diazonium salts were synthesized according to a modified procedure previously reported by Tóth and co-workers.<sup>[5]</sup>

Tetrafluoroboric acid (48% in water, 2.60 eq) was dissolved in 4.00 mL water, aniline **13** (1.00 eq) was added at 0 °C and stirred for 30 minutes. A solution of sodium nitrite (1.00 eq) in 1.50 mL water was added dropwise and the resulting mixture was stirred for 30 minutes. The mixture was filtered and the residue was dissolved in a minimum amount of acetone and precipitated with diethylether. The products **2** were collected by filtration and washed with diethylether.

## 1.2.3) General Procedure C, Synthesis of Azobenzofurans (GP C)

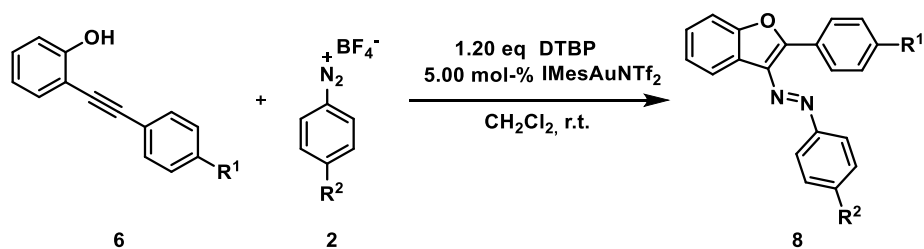

IMesAuNTf<sub>2</sub> (5.00 mol-%) and 2,6-di*tert*butylpyridine (1.20 eq) were dissolved in dichloromethane and stirred for ten minutes. Aryldiazonium tetrafluoroborate **2** (3.00 eq), molecular sieves (3 Å) and *o*-alkynylphenol **6** (1.00 eq) were added and the mixture was stirred for the mentioned time at room temperature. The mixture was evaporated onto Celite<sup>®</sup> and purified by flash column chromatography.

### 1.3) Synthesis of Substrates

#### 1.3.1.1) 2-(4-Tolylethynyl)phenol

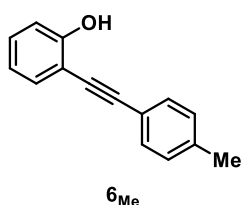

According to **GP A**: 2-Iodophenol **11** (2.00 g, 9.09 mmol, 1.00 eq) was dissolved in 50 mL THF, bis(triphenylphosphine)palladium(II) dichloride (160 mg, 227  $\mu$ mol, 2.50 mol-%), copper iodide (86.6 mg, 455  $\mu$ mol, 5.00 mol-%), diisopropylamine (1.28 mL, 920 mg, 9.09 mmol, 1.00 eq) and 1-ethynyl-4-methylbenzene **12<sub>Me</sub>** (1.38 mL, 1.27 mg, 10.9 mmol, 1.20 eq)

were added and the mixture was stirred at room temperature for 16 hours. Purification by flash column chromatography (SiO<sub>2</sub>, PE/EA, 100:1) yielded the product **6<sub>Me</sub>** (1.77 g, 8.50 mmol, 93%) as a light brown, crystalline solid.

$R_f$  (SiO<sub>2</sub>, PE/EA, 10:1) = 0.42; <sup>1</sup>H NMR (299.95 MHz, CD<sub>2</sub>Cl<sub>2</sub>):  $\delta$  = 2.38 (s, 3 H), 5.89 (s, 1 H), 6.88-6.99 (m, 2 H), 7.17-7.27 (m, 3 H), 7.40-7.48 (m, 3 H) ppm. The spectroscopic data matches previously reported data.<sup>[6]</sup>

#### 1.3.1.2) 2-((4-Methoxyphenyl)ethynyl)phenol

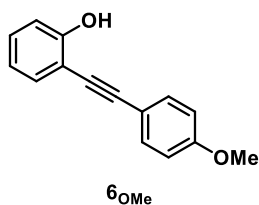

According to **GP A**: 2-Iodophenol **11** (2.27 g, 10.3 mmol, 1.00 eq) was dissolved in 20 mL toluene, bis(triphenylphosphine)palladium(II) dichloride (181 mg, 258  $\mu$ mol, 2.50 mol-%), copper iodide (98.3 mg, 516  $\mu$ mol, 5.00 mol-%), diisopropylamine (1.46 mL, 1.04 g, 10.3 mmol, 1.00 eq) and 1-ethynyl-4-methoxybenzene **12<sub>OMe</sub>** (1.47 mL, 1.50 g, 11.4 mmol, 1.10 eq)

were added and the mixture was stirred at room temperature for four hours. Purification by flash column chromatography (SiO<sub>2</sub>, PE/EA, 50:1) yielded the product **6<sub>OMe</sub>** (1.67 g, 7.45 mmol, 72%) as a light yellow solid.

$R_f$  (SiO<sub>2</sub>, PE/EA, 10:1) = 0.26; <sup>1</sup>H NMR (300.51 MHz, CD<sub>2</sub>Cl<sub>2</sub>):  $\delta$  = 3.83 (s, 3 H), 5.87 (bs, 1 H), 6.88-6.97 (m, 4 H), 7.23-7.29 (m, 1 H), 7.41 (dd,  $J$  = 7.68 Hz,  $J$  = 1.46 Hz, 1 H), 7.50 (dt,  $J$  = 8.93 Hz,  $J$  = 2.16 Hz, 2 H) ppm. The spectroscopic data matches previously reported data.<sup>[7]</sup>

## 1.3.1.3) 2-(Phenylethynyl)phenol

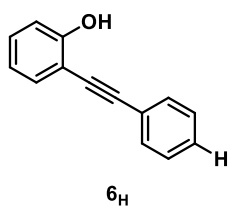

According to **GP A**: 2-Iodophenol **11** (2.27 g, 10.3 mmol, 1.00 eq) was dissolved in 20 mL toluene, bis(triphenylphosphine)palladium(II) dichloride (181 mg, 258  $\mu$ mol, 2.50 mol-%), copper iodide (98.3 mg, 516  $\mu$ mol, 5.00 mol-%), diisopropylamine (1.46 mL, 1.04 mg, 10.3 mmol, 1.00 eq) and phenylacetylene **12<sub>H</sub>** (1.18 mL, 1.16 g, 11.4 mmol, 1.10 eq) were added and the mixture was stirred at room temperature for four hours. Purification by flash column chromatography (SiO<sub>2</sub>, PE/EA, 100:1  $\rightarrow$  50:1) yielded the product **6<sub>H</sub>** (1.95 g, 10.0 mmol, 97%) as a light yellow solid.

$R_f$  (SiO<sub>2</sub>, PE/EA, 10:1) = 0.44; <sup>1</sup>H NMR (300.51 MHz, CD<sub>2</sub>Cl<sub>2</sub>):  $\delta$  = 5.88 (s, 1 H), 6.90-6.99 (m, 2 H), 7.25-7.32 (m, 1 H), 7.36-7.46 (m, 4 H), 7.53-7.60 (m, 2 H) ppm. The spectroscopic data matches previously reported data.<sup>[8]</sup>

## 1.3.1.4) 2-((4-Fluorophenyl)ethynyl)phenol

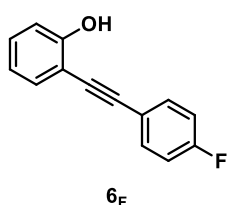

According to **GP A**: 2-Iodophenol **11** (1.20 g, 5.45 mmol, 1.00 eq) was dissolved in 20 mL toluene, bis(triphenylphosphine)palladium(II) dichloride (95.7 mg, 136  $\mu$ mol, 2.50 mol-%), copper iodide (51.9 mg, 273  $\mu$ mol, 5.00 mol-%), diisopropylamine (770  $\mu$ L, 552 mg, 5.45 mmol, 1.00 eq) and 1-ethynyl-4-fluorobenzene **12<sub>F</sub>** (688  $\mu$ L, 721 mg, 6.00 mmol, 1.10 eq) were added and the mixture was stirred at room temperature for three hours. Purification by flash column chromatography (SiO<sub>2</sub>, PE/EA, 50:1) yielded the product **6<sub>F</sub>** (902 mg, 4.25 mmol, 78%) as a light brown, crystalline solid.

$R_f$  (SiO<sub>2</sub>, PE/EA, 4:1) = 0.57; <sup>1</sup>H NMR (300.51 MHz, CDCl<sub>3</sub>):  $\delta$  = 5.76 (s, 1 H), 6.91 (dt,  $J$  = 7.62 Hz,  $J$  = 1.05 Hz, 1 H), 6.97 (dd,  $J$  = 7.62 Hz,  $J$  = 0.66 Hz, 1 H), 7.08 (tt,  $J$  = 8.71 Hz,  $J$  = 2.79 Hz, 2 H), 7.25-7.31 (m, 1 H), 7.41 (dd,  $J$  = 7.62 Hz,  $J$  = 1.59 Hz, 1 H), 7.50-7.57 (m, 2 H) ppm; <sup>19</sup>F NMR (282.76 MHz, CDCl<sub>3</sub>):  $\delta$  = -109.89 (s) ppm. The spectroscopic data matches previously reported data.<sup>[4]</sup>



## 1.3.1.5) Benzenediazonium tetrafluoroborate

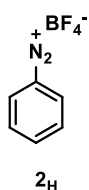

According to **GP B**: Tetrafluoroboric acid (48% in water, 5.55 mL, 7.66 g, 41.9 mmol, 2.60 eq) was dissolved in 10.0 mL water, aniline **13<sub>H</sub>** (1.47 mL, 1.50 g, 16.1 mmol, 1.00 eq) was added at 0 °C and stirred for 60 minutes. A solution of sodium nitrite (1.11 g, 16.1 mmol, 1.00 eq) in 2.00 mL water was added dropwise and the resulting mixture was stirred for 60 minutes. The product **2<sub>H</sub>** (2.35 g, 12.3 mmol, 76%) was isolated as a colorless solid.

<sup>1</sup>H NMR (299.95 MHz, CD<sub>3</sub>CN): δ = 7.90-7.99 (m, 2 H), 8.40 (tt, *J* = 8.08 Hz, *J* = 1.22 Hz, 1 H), 8.44-8.51 (m, 2 H) ppm; <sup>19</sup>F NMR (282.21 MHz, CD<sub>3</sub>CN): δ = -151.73 (s, 4 F) ppm. The spectroscopic data matches previously reported data.<sup>[5]</sup>

## 1.3.1.6) 4-Methylbenzenediazonium tetrafluoroborate

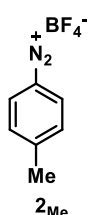

According to **GP B**: Tetrafluoroboric acid (48% in water, 3.45 mL, 4.76 g, 26.0 mmol, 2.60 eq), 4-methylaniline **13<sub>Me</sub>** (1.07 g, 10.0 mmol, 1.00 eq), sodium nitrite (690 mg, 10.0 mmol, 1.00 eq). The product **2<sub>Me</sub>** (342 mg, 1.66 mmol, 17%) was isolated as a light purple crystalline solid.

<sup>1</sup>H NMR (399.82 MHz, DMSO-*d*<sup>6</sup>): δ = 2.58 (s, 3 H), 7.80 (d, *J* = 8.34 Hz, 2 H), 8.55 (d, *J* = 8.34 Hz, 2 H) ppm; <sup>19</sup>F NMR (376.17 MHz, DMSO-*d*<sup>6</sup>): δ = -148.32 (s, 4 F) ppm. The spectroscopic data matches previously reported data.<sup>[9]</sup>

## 1.3.1.7) 4-Methoxybenzenediazonium tetrafluoroborate

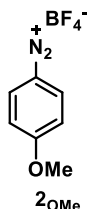

According to **GP B**: Tetrafluoroboric acid (48% in water, 3.45 mL, 4.76 g, 26.0 mmol, 2.60eq), 4-methoxyaniline **13<sub>OMe</sub>** (1.23 g, 10.0 mmol, 1.00 eq), sodium nitrite (690 mg, 10.0 mmol, 1.00 eq). The product **2<sub>OMe</sub>** (745 mg, 3.36 mmol, 34%) was isolated as a light purple, crystalline solid.

<sup>1</sup>H NMR (399.82 MHz, DMSO-*d*<sup>6</sup>): δ = 4.04 (d, *J* = 1.14 Hz, 3 H), 7.48 (dd, *J* = 9.25 Hz, *J* = 1.21 Hz, 2 H), 8.58-8.64 (m, 2 H) ppm; <sup>19</sup>F NMR (376.17 MHz, DMSO-*d*<sup>6</sup>): δ = -148.33 (s, 4 F) ppm. The spectroscopic data matches previously reported data.<sup>[9]</sup>

**1.3.1.8) 4-Fluorobenzenediazonium tetrafluoroborate**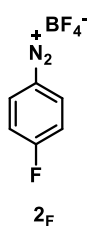

According to **GP B**: Tetrafluoroboric acid (48% in water, 3.50 mL, 4.76 g, 26.0 mmol, 2.60 eq), 4-fluoroaniline **13<sub>F</sub>** (1.11 g, 10.0 mmol, 1.00 eq), sodium nitrite (690 mg, 10.0 mmol, 1.00 eq). The product **2<sub>F</sub>** (416 mg, 1.98 mmol, 20%) was collected by filtration as a light yellow, crystalline solid.

$^1\text{H}$  NMR (300.51 MHz,  $(\text{CD}_3)_2\text{CO}$ ):  $\delta = 7.88\text{-}7.94$  (m, 2 H),  $8.99\text{-}9.03$  (m, 2 H) ppm;  $^{19}\text{F}$  NMR (282.76 MHz,  $(\text{CD}_3)_2\text{CO}$ ):  $\delta = -86.63$  (s, 1 F),  $-151.09$  (s, 4 F) ppm. The spectroscopic data matches previously reported data.<sup>[10]</sup>

**1.3.1.9) 4-Nitrobenzenediazonium tetrafluoroborate**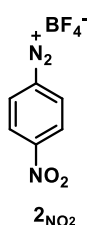

According to **GP B**: Tetrafluoroboric acid (48% in water, 3.50 mL, 4.76 g, 26.0 mmol, 2.60 eq), 4-nitroaniline **13<sub>NO<sub>2</sub></sub>** (1.11 g, 10.0 mmol, 1.00 eq), sodium nitrite (690 mg, 10.0 mmol, 1.00 eq). The product **2<sub>NO<sub>2</sub></sub>** (1.37 g, 5.78 mmol, 58%) was collected by filtration as a light yellow, crystalline solid.

$^1\text{H}$  NMR (399.82 MHz,  $\text{DMSO-d}_6$ ):  $\delta = 8.72$  (d,  $J = 8.89$  Hz, 2 H),  $8.93$  (d,  $J = 8.89$ , 2 H) ppm;  $^{19}\text{F}$  NMR (376.17 MHz,  $\text{DMSO-d}_6$ ):  $\delta = -148.32$  (s, 4 F) ppm. The spectroscopic data matches previously reported data.<sup>[11]</sup>

## 1.4) Gold-Catalyzed Reactions

### 1.4.1) General Procedure for Reaction Screening, Arylated Benzofuran

The formation of substituted benzofuran **7<sub>Me</sub>** was determined *via* GC MS analysis, according to the following procedure using hexamethylbenzene as internal standard.

Base (200  $\mu$ mol), diazonium salt (200  $\mu$ mol) and hexamethylbenzene (100  $\mu$ mol) were dissolved in 500  $\mu$ L stock solution of alkyne (200  $\mu$ mol/mL), 100  $\mu$ L of a stock solution of catalyst (10.0  $\mu$ mol/mL in dichloromethane) and 400  $\mu$ L addition solvent were added. The mixture was stirred at room temperature under irradiation with blue LED (450 nm) for two hours. The mixture was filled up to 5.00 mL and an aliquot was taken for GC MS analysis. The yields were determined *via* internal standard and the response factor was determined with an external five-point calibration curve. All reactions were carried out in duplicate and the averages are given unless specified.

| Entry | Catalyst<br>Base                                          | Yield <b>7<sub>Me</sub></b> [%]<br>Irradiation with blue-LED |                   |                   |
|-------|-----------------------------------------------------------|--------------------------------------------------------------|-------------------|-------------------|
|       |                                                           | Solvent                                                      | MeCN              | MeCN              |
|       |                                                           | A                                                            | B                 | Average           |
| 1     | Ph <sub>3</sub> PAuCl<br>NaHCO <sub>3</sub>               | 44 <sup>(a)</sup>                                            | 48 <sup>(a)</sup> | 46 <sup>(b)</sup> |
| 2     | Ph <sub>3</sub> PAuNTf <sub>2</sub><br>NaHCO <sub>3</sub> | 55 <sup>(a)</sup>                                            | 53 <sup>(a)</sup> | 54 <sup>(c)</sup> |
| 3     | Ph <sub>3</sub> PAuCl<br>DTBP                             | 4                                                            | 4                 | 4                 |
| 4     | Ph <sub>3</sub> PAuNTf <sub>2</sub><br>DTBP               | 8                                                            | 13                | 11                |

(a) Full conversion of starting material. (b) Average yield side-product **10**: 7%. (c) Average yield side-product **10**: 25%.

## 1.4.2) General Procedure for Reaction Screening, Azobenzofuran

The formation of azobenzofuran **8<sub>Me</sub>** was determined and quantified by <sup>1</sup>H NMR spectroscopy, according to the following procedure using benzylacetate as internal standard.

Base (100 μmol) and diazonium salt (100 μmol) were dissolved in 100 μL of a stock solution of catalyst (25.0 μmol/mL in dichloromethane) and molecular sieves (3 Å) was added. 400 μL stock solution of alkyne (125 μmol/mL) was added and the mixture was stirred for 24 hours at room temperature. The solvents were evaporated and the crude product was dried at the Schlenk line. The solid was dissolved in 600 μL CDCl<sub>3</sub> and treated with 7.00 μL of benzylacetate. The yields were determined *via* <sup>1</sup>H NMR spectroscopy. If not mentioned otherwise, all reactions were carried out in duplicate and the averages are given unless specified.

| Entry | Catalyst<br>Base                                          | Yield <b>8<sub>Me</sub></b> [%]<br>No irradiation |                   |                 |                 |                 |                 |
|-------|-----------------------------------------------------------|---------------------------------------------------|-------------------|-----------------|-----------------|-----------------|-----------------|
|       |                                                           | CH <sub>2</sub> Cl <sub>2</sub>                   |                   |                 | MeCN            |                 |                 |
|       | Solvent                                                   | A                                                 | B                 | Average         | A               | B               | Average         |
| 1     | Ph <sub>3</sub> PAuCl<br>NaHCO <sub>3</sub>               | 5                                                 | 5                 | 5               | 6               | 9               | 7               |
| 2     | Ph <sub>3</sub> PAuNTf <sub>2</sub><br>NaHCO <sub>3</sub> | 22 <sup>(a)</sup>                                 | 23 <sup>(a)</sup> | 22              | 12              | 10              | 11              |
| 3     | Ph <sub>3</sub> PAuCl<br>DTBP                             | Not<br>observed                                   | Not<br>observed   | Not<br>observed | Not<br>observed | Not<br>observed | Not<br>observed |
| 4     | Ph <sub>3</sub> PAuNTf <sub>2</sub><br>DTBP               | 15                                                | 23                | 19              | 21              | 26              | 23              |
| 5     | IMesAuNTf <sub>2</sub><br>2.00 eq NaHCO <sub>3</sub>      | 10 <sup>(a)</sup>                                 | 10 <sup>(a)</sup> | 10              | 20              | 25              | 22              |
| 6     | IMesAuNTf <sub>2</sub><br>2.00 eq DTBP                    | 66                                                | 70                | 68              | 16              | 19              | 17              |
| 7     | IMesAuNTf <sub>2</sub><br>1.20 eq DTBP                    | 59 <sup>(b)</sup>                                 | 67 <sup>(b)</sup> | 63              | -               | -               | -               |
| 8     | IMesAuNTf <sub>2</sub><br>1.20 eq DTBP                    | 64 <sup>(c)</sup>                                 | 67 <sup>(d)</sup> | -               | -               | -               | -               |

(a) Full conversion of starting material. (b) Full conversion of starting material after 48 hours. (c) Single run, 150 μmol (3 equiv.) **2<sub>H</sub>** were used. (d) Single run, 200 μmol (4 equiv.) **2<sub>H</sub>** were used.

## 1.4.3) Gold-Catalyzed Reactions, Scope of Reaction

## 1.4.3.1) (E)-1-(2-(4-Methoxyphenyl)benzofuran-3-yl)-2-phenyldiazene

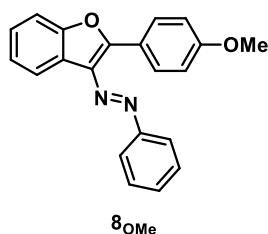

According to **GP C**, 2-((4-methoxyphenyl)ethynyl)phenol **6<sub>OMe</sub>** (56.1 mg, 250  $\mu$ mol, 1.00 eq) and 2,6-di*tert*butylpyridine (67.4  $\mu$ L, 57.4 mg, 300  $\mu$ mol, 1.20 eq) were dissolved in 2.00 mL dichloromethane and stirred at room temperature for ten minutes. Benzenediazonium tetrafluoroborate **2<sub>H</sub>** (144 mg, 750  $\mu$ mol, 3.00 eq) and IMesAuNTf<sub>2</sub> (9.77 mg, 12.5  $\mu$ mol, 5.00 mol-%) were added and the mixture was stirred at room temperature for 16 hours. The mixture was evaporated onto Celite<sup>®</sup> and purification by flash column chromatography (Al<sub>2</sub>O<sub>3</sub>, PE/Et<sub>2</sub>O 200:1) yielded the product **8<sub>OMe</sub>** (72.3 mg, 220  $\mu$ mol, 88%) as an orange, crystalline solid.

M.p.: 149 °C; *R<sub>f</sub>* (SiO<sub>2</sub>, PE/EA, 10:1) = 0.40; IR(ATR):  $\tilde{\nu}$  = 686, 745, 770, 783, 836, 934, 1010, 1022, 1075, 1105, 1175, 1205, 1247, 1304, 1411, 1422, 1448, 1502, 1580, 1604, 1742, 1938, 2033, 2839, 2965, 3030, 3065, 3083 cm<sup>-1</sup>; UV ( $\lambda$  = 242 nm in CH<sub>2</sub>Cl<sub>2</sub>): log  $\epsilon$  = 3.87; <sup>1</sup>H NMR (300.51 MHz, CDCl<sub>3</sub>):  $\delta$  = 3.92 (s, 3 H), 7.08 (td, *J* = 9.07 Hz, *J* = 2.10 Hz, 2 H), 7.33-7.39 (m, 2 H), 7.43-7.47 (m, 1 H), 7.51-7.56 (m, 3 H), 7.93-7.96 (m, 2 H), 8.40 (td, *J* = 9.07 Hz, *J* = 2.10 Hz, 2 H), 8.44-8.48 (m, 1 H) ppm; <sup>13</sup>C NMR (100.66 MHz, CDCl<sub>3</sub>):  $\delta$  = 55.59 (q), 111.09 (d), 114.49 (d, 2 C), 121.58 (s), 122.64 (d, 2 C), 122.66 (s), 124.01 (d), 124.81 (d), 125.84 (d), 129.25 (d, 2 C), 130.16 (d), 130.46 (d, 2 C), 133.79 (s), 153.79 (s), 154.01 (s), 157.74 (s), 161.43 (s) ppm; HR-DART (+) C<sub>21</sub>H<sub>17</sub>N<sub>2</sub>O<sub>2</sub> [M+H]<sup>+</sup>: calcd. 329.1276, found 329.1285.

1.4.3.2) (E)-1-Phenyl-2-(2-(*p*-tolyl)benzofuran-3-yl)diazene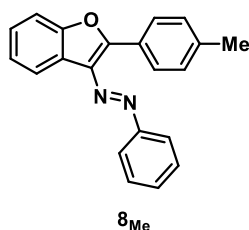

According to **GP C**, 2-(*p*-tolylethynyl)phenol **6<sub>Me</sub>** (52.1 mg, 250  $\mu$ mol, 1.00 eq) and 2,6-di*tert*butylpyridine (67.4  $\mu$ L, 57.4 mg, 300  $\mu$ mol, 1.20 eq) were dissolved in 2.00 mL dichloromethane and stirred at room temperature for ten minutes. Benzenediazonium tetrafluoroborate **2<sub>H</sub>** (144 mg, 750  $\mu$ mol, 3.00 eq) and IMesAuNTf<sub>2</sub> (9.77 mg, 12.5  $\mu$ mol, 5.00 mol-%) were added and the mixture was stirred at room temperature for 27 hours. The mixture was evaporated onto Celite<sup>®</sup> and purification by flash column chromatography (Al<sub>2</sub>O<sub>3</sub>, PE/Et<sub>2</sub>O, 200:1) yielded the desired product **8<sub>Me</sub>** (60.9 mg, 195  $\mu$ mol, 78%) as an orange, crystalline solid.

M.p.: 137 °C;  $R_f$  (SiO<sub>2</sub>, PE/EA, 10:1) = 0.73; IR(ATR):  $\tilde{\nu}$  = 609, 617, 634, 670, 689, 716, 743, 774, 825, 874, 934, 1017, 1077, 1145, 1201, 1252, 1289, 1304, 1347, 1372, 1410, 1450, 1475, 1504, 1552, 1577, 1608, 1784, 1898, 1921, 2855, 2924, 3032, 3065 cm<sup>-1</sup>; UV ( $\lambda$  = 295 nm in CH<sub>2</sub>Cl<sub>2</sub>): log  $\epsilon$  = 4.43; <sup>1</sup>H NMR (300.51 MHz, CDCl<sub>3</sub>):  $\delta$  = 2.46 (bs, 3 H), 7.34-7.41 (m, 4 H), 7.44-7.48 (m, 1 H), 7.53-7.57 (m, 3 H), 7.95-7.97 (m, 2 H), 8.32-8.34 (m, 2 H), 8.46-8.48 (m, 1 H) ppm; <sup>13</sup>C NMR (100.66 MHz, CDCl<sub>3</sub>):  $\delta$  = 21.73 (q), 111.22 (d), 121.47 (s), 122.71 (d, 2 C), 124.13 (d), 124.85 (d), 126.03 (d), 127.17 (s), 128.76 (d, 2 C), 129.26 (d, 2 C), 129.65 (d, 2 C), 130.30 (d), 134.32 (s), 140.52 (s), 153.89 (s), 153.96 (s), 157.77 (s) ppm; HRMS (EI (+), 70 eV) C<sub>21</sub>H<sub>16</sub>N<sub>2</sub>O [M]<sup>+</sup>: calcd. 312.12571, found 312.12462.

#### 1.4.3.3) (E)-1-Phenyl-2-(2-phenylbenzofuran-3-yl)diazene

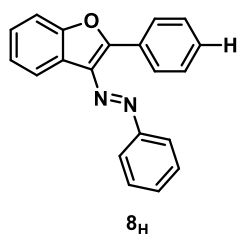

According to **GP C**, 2-(phenylethynyl)phenol **6<sub>H</sub>** (48.6 mg, 250  $\mu$ mol, 1.00 eq) and 2,6-di*tert*-butylpyridine (67.4  $\mu$ L, 57.4 mg, 300  $\mu$ mol, 1.20 eq) were dissolved in 2.00 mL dichloromethane and stirred at room temperature for ten minutes. Benzenediazonium tetrafluoroborate **2<sub>H</sub>** (144 mg, 750  $\mu$ mol, 3.00 eq) and IMeAuNTf<sub>2</sub> (9.77 mg, 12.5  $\mu$ mol, 5.00 mol-%) were added and the mixture was stirred at room temperature for 168 hours. The mixture was evaporated onto Celite® and purification by flash column chromatography (Al<sub>2</sub>O<sub>3</sub>, PE/Et<sub>2</sub>O, 200:1) yielded the desired product **8<sub>H</sub>** (16.5 mg, 55.3  $\mu$ mol, 22%) as an orange, crystalline solid.

M.p.: 121 °C;  $R_f$  (SiO<sub>2</sub>, PE/EA, 10:1) = 0.76; IR(ATR):  $\tilde{\nu}$  = 620, 663, 689, 745, 773, 934, 1029, 1070, 1109, 1141, 1204, 1288, 1343, 1372, 1412, 1439, 1455, 1475, 1490, 1552 cm<sup>-1</sup>; UV ( $\lambda$  = 294 nm in CH<sub>2</sub>Cl<sub>2</sub>): log  $\epsilon$  = 4.36; <sup>1</sup>H NMR (300.51 MHz, CDCl<sub>3</sub>):  $\delta$  = 7.39 (dt,  $J$  = 7.51 Hz,  $J$  = 1.92 Hz, 2 H), 7.45-7.51 (m, 2 H), 7.54-7.58 (m, 5 H), 7.96-7.99 (m, 2 H), 8.42-8.49 (m, 3 H) ppm; <sup>13</sup>C NMR (100.66 MHz, CDCl<sub>3</sub>):  $\delta$  = 111.28 (d), 121.38 (s), 122.76 (d, 2 C), 124.26 (d), 124.93 (d), 126.23 (d), 128.80 (d, 2 C), 128.86 (d, 2 C), 129.29 (d, 2 C), 129.94 (s), 130.08 (d), 130.47 (d), 134.72 (s), 153.91 (s), 153.98 (s), 157.30 (s) ppm; HRMS (EI (+), 70 eV) C<sub>20</sub>H<sub>14</sub>N<sub>2</sub>O [M]<sup>+</sup>: calcd. 298.11006, found 298.11001.

## 1.4.3.4) (E)-1-(2-(4-Fluorophenyl)benzofuran-3-yl)-2-phenyldiazene

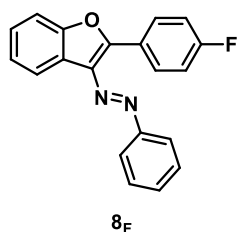

According to **GPC**, 2-((4-fluorophenyl)ethynyl)phenol **6<sub>F</sub>** (53.1 mg, 250  $\mu$ mol, 1.00 eq) and 2,6-di*tert*-butylpyridine (67.4  $\mu$ L, 57.4 mg, 300  $\mu$ mol, 1.20 eq) were dissolved in 2.00 mL dichloromethane and stirred at room temperature for ten minutes. Benzenediazonium tetrafluoroborate **2<sub>F</sub>** (144 mg, 750  $\mu$ mol, 3.00 eq) and IMesAuNTf<sub>2</sub> (9.77 mg, 12.5  $\mu$ mol, 5.00 mol-%) were added and the mixture was stirred at room temperature for 21 days. The mixture was evaporated onto Celite<sup>®</sup> and purification by flash column chromatography (Al<sub>2</sub>O<sub>3</sub>, PE/Et<sub>2</sub>O, 200:1) yielded the desired product **8<sub>F</sub>** (26.0 mg, 82.2  $\mu$ mol, 33%) as an orange, crystalline solid.

M.p.: 142 °C; R<sub>f</sub> (SiO<sub>2</sub>, PE/EA, 10:1) = 0.71; IR(ATR):  $\tilde{\nu}$  = 689, 746, 771, 797, 839, 936, 1017, 1076, 1102, 1160, 1201, 1232, 1286, 1370, 1411, 1450, 1477, 1500, 1556, 1598 cm<sup>-1</sup>; UV ( $\lambda$  = 292 nm in CH<sub>2</sub>Cl<sub>2</sub>): log  $\epsilon$  = 4.42; <sup>1</sup>H NMR (300.51 MHz, CDCl<sub>3</sub>):  $\delta$  = 7.24-7.26 (m, 2 H), 7.37 (dt,  $J$  = 7.56 Hz,  $J$  = 0.93 Hz, 1 H), 7.40 (dt,  $J$  = 7.56 Hz,  $J$  = 0.93 Hz, 1 H), 7.46-7.49 (m, 1 H), 7.54-7.57 (m, 3 H), 7.94-7.96 (m, 2 H), 8.43-8.48 (m, 3 H) ppm; <sup>13</sup>C NMR (150.93 MHz, CDCl<sub>3</sub>):  $\delta$  = 111.24 (d), 116.12 (d, d,  $J$  = 22.0 Hz, 2 C), 121.29 (s), 122.70 (d, 2 C), 124.22 (d), 125.02 (d), 126.22 (s, d,  $J$  = 22.0 Hz), 126.28 (d), 129.23 (d, 2 C), 130.56 (d), 130.77 (d, d,  $J$  = 8.45 Hz, 2 C), 134.40 (s, d,  $J$  = 1.31 Hz), 153.83 (s, d,  $J$  = 7.12 Hz), 156.35 (s), 164.03 (s, d,  $J$  = 252 Hz) ppm; <sup>19</sup>F NMR (282.76 MHz, CDCl<sub>3</sub>):  $\delta$  = -109.80 (s) ppm; HRMS (EI (+), 70 eV) C<sub>20</sub>H<sub>13</sub>N<sub>2</sub>OF [M]<sup>+</sup>: calcd. 316.10064, found 316.10073.

1.4.3.5) (E)-1-(4-Methoxyphenyl)-2-(2-(*p*-tolyl)benzofuran-3-yl)diazene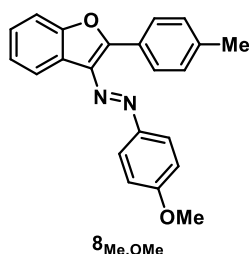

According to **GPC**, 2-(*p*-tolylethynyl)phenol **6<sub>Me</sub>** (52.1 mg, 250  $\mu$ mol, 1.00 eq) and 2,6-di*tert*-butylpyridine (67.4  $\mu$ L, 57.4 mg, 300  $\mu$ mol, 1.20 eq) were dissolved in 2.00 mL dichloromethane and stirred at room temperature for ten minutes. *p*-Methoxybenzenediazonium tetrafluoroborate **2<sub>OMe</sub>** (166 mg, 750  $\mu$ mol, 3.00 eq) and IMesAuNTf<sub>2</sub> (9.77 mg, 12.5  $\mu$ mol, 5.00 mol-%) were added and the mixture was stirred at room temperature for 48 hours. The mixture was evaporated onto Celite<sup>®</sup> and purification by flash column chromatography (Al<sub>2</sub>O<sub>3</sub>, PE/Et<sub>2</sub>O, 100:1) yielded the desired product **8<sub>Me,OMe</sub>** (33.0 mg, 96.4  $\mu$ mol, 39%) as an orange, crystalline solid.

M.p.: 144 °C;  $R_f$  (SiO<sub>2</sub>, PE/EA, 10:1) = 0.57; IR(ATR):  $\tilde{\nu}$  = 608, 618, 639, 661, 715, 744, 758, 799, 820, 836, 933, 970, 1007, 1023, 1075, 1101, 1135, 1155, 1182, 1202, 1245, 1286, 1292, 1310, 1320, 1339, 1346, 1375, 1400, 1413, 1436, 1446, 1458, 1472, 1496, 1551, 1578, 1601, 2835, 2852, 2921, 2960, 3002, 3022, 3045, 3077 cm<sup>-1</sup>; <sup>1</sup>H NMR (600.13 MHz, CDCl<sub>3</sub>):  $\delta$  = 2.46 (s, 3 H), 3.92 (s, 3 H), 7.01-7.08 (m, 2 H), 7.31-7.39 (m, 4 H), 7.53 (dt,  $J$  = 8.19 Hz,  $J$  = 0.84 Hz, 1 H), 7.91-7.98 (m, 2 H), 8.29-8.34 (m, 2 H), 8.44-8.48 (m, 1 H) ppm; <sup>13</sup>C NMR (150.91 MHz, CDCl<sub>3</sub>):  $\delta$  = 21.71 (q), 55.75 (q), 111.17 (d), 114.44 (d, 2 C), 121.74 (s), 124.14 (d), 124.40 (d, 2 C), 124.63 (d), 125.87 (d), 127.37 (s), 128.57 (d, 2 C), 129.60 (d, 2 C), 134.13 (s), 140.17 (s), 148.38 (s), 153.87 (s), 156.62 (s), 161.62 (s) ppm; HRMS (ESI (+)) C<sub>22</sub>H<sub>19</sub>N<sub>2</sub>O<sub>2</sub> [M+H]<sup>+</sup>: calcd. 343.14410, found 343.14438.

#### 1.4.3.6) (E)-1-(*p*-Tolyl)-2-(2-(*p*-tolyl)benzofuran-3-yl)diazene

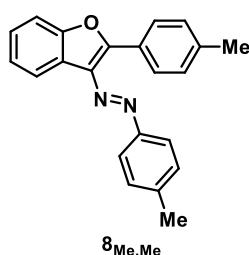

According to **GP C**, 2-(*p*-tolylethynyl)phenol **6**<sub>Me</sub> (52.1 mg, 250  $\mu$ mol, 1.00 eq) and 2,6-di*tert*-butylpyridine (67.4  $\mu$ L, 57.4 mg, 300  $\mu$ mol, 1.20 eq) were dissolved in 2.00 mL dichloromethane and stirred at room temperature for ten minutes. *p*-Tolyldiazonium tetrafluoroborate **2**<sub>Me</sub> (154 mg, 750  $\mu$ mol, 3.00 eq) and IMesAuNTf<sub>2</sub> (9.77 mg, 12.5  $\mu$ mol, 5.00 mol-%) were added and the mixture was stirred at room temperature for 27 hours. The mixture

was evaporated onto Celite® and purification by flash column chromatography (Al<sub>2</sub>O<sub>3</sub>, PE/Et<sub>2</sub>O, 200:1) yielded the desired product **8**<sub>Me,Me</sub> (56.3 mg, 172  $\mu$ mol, 69%) as an orange, crystalline solid.

M.p.: 135 °C;  $R_f$  (SiO<sub>2</sub>, PE/EA, 10:1) = 0.66; IR(ATR):  $\tilde{\nu}$  = 609, 662, 741, 757, 819, 875, 934, 1011, 1021, 1036, 1075, 1104, 1141, 1160, 1186, 1203, 1253, 1289, 1372, 1449, 1474, 1504, 1552, 1577, 1601, 2919, 3037, 3059, 3081 cm<sup>-1</sup>; UV ( $\lambda$  = 298 nm in CH<sub>2</sub>Cl<sub>2</sub>): log  $\epsilon$  = 4.59; <sup>1</sup>H NMR (300.51 MHz, CDCl<sub>3</sub>):  $\delta$  = 2.46 (bs, 6 H), 7.32-7.40 (m, 6 H), 7.52-7.55 (m, 1 H), 7.87 (td,  $J$  = 8.29 Hz,  $J$  = 1.82 Hz, 2 H), 8.32 (td,  $J$  = 8.29 Hz,  $J$  = 1.82 Hz, 2 H), 8.45-8.48 (m, 1 H) ppm; <sup>13</sup>C NMR (100.66 MHz, CDCl<sub>3</sub>):  $\delta$  = 21.65 (q), 21.72 (q), 111.17 (d), 121.61 (s), 122.67 (d, 2 C), 124.13 (d), 124.74 (d), 125.95 (d), 127.29 (s), 128.68 (d, 2 C), 129.62 (d, 2 C), 129.93 (d, 2 C), 134.24 (s), 140.35 (s), 140.77 (s), 152.10 (s), 153.89 (s), 157.23 (s) ppm; HRMS (EI (+), 70 eV) C<sub>22</sub>H<sub>18</sub>N<sub>2</sub>O [M]<sup>+</sup>: calcd. 326.14136, found 326.13978.



1.4.3.7) (E)-1-(4-Fluorophenyl)-2-(2-(*p*-tolyl)benzofuran-3-yl)diazene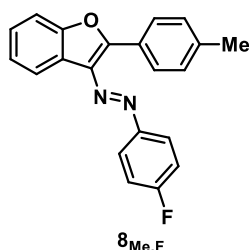

According to **GP C**, 2-(*p*-tolylethynyl)phenol **6<sub>Me</sub>** (52.1 mg, 250  $\mu$ mol, 1.00 eq) and 2,6-di*tert*butylpyridine (67.4  $\mu$ L, 57.4 mg, 300  $\mu$ mol, 1.20 eq) were dissolved in 2.00 mL dichloromethane and stirred at room temperature for ten minutes. *p*-Fluorobenzenediazonium tetrafluoroborate **2<sub>F</sub>** (157 mg, 750  $\mu$ mol, 3.00 eq) and IMesAuNTf<sub>2</sub> (9.77 mg, 12.5  $\mu$ mol, 5.00 mol-%) were added and the mixture was stirred at room temperature for 48 hours. The mixture was evaporated onto Celite® and purification by flash column chromatography (Al<sub>2</sub>O<sub>3</sub>, PE/Et<sub>2</sub>O, 200:1) yielded the desired product **8<sub>Me,F</sub>** (48.7 mg, 147  $\mu$ mol, 59%) as an orange, crystalline solid.

M.p.: 156 °C; R<sub>f</sub> (SiO<sub>2</sub>, PE/EA, 10:1) = 0.66; IR(ATR):  $\tilde{\nu}$  = 609, 636, 663, 746, 820, 839, 875, 935, 1007, 1023, 1076, 1090, 1105, 1135, 1151, 1192, 1205, 1226, 1287, 1342, 1375, 1434, 1449, 1474, 1494, 1553, 1578, 1591, 1738, 1897, 2921, 3037 cm<sup>-1</sup>; UV ( $\lambda$  = 296 nm in CH<sub>2</sub>Cl<sub>2</sub>): log  $\epsilon$  = 4.40; <sup>1</sup>H NMR (300.51 MHz, CDCl<sub>3</sub>):  $\delta$  = 2.46 (bs, 3 H), 7.19-7.25 (m, 2 H), 7.33-7.41 (m, 4 H), 7.53-7.56 (m, 1 H), 7.93-7.98 (m, 2 H), 8.43 (td,  $J$  = 8.37 Hz,  $J$  = 1.60 Hz, 2 H), 8.42-8.44 (m, 1 H) ppm; <sup>13</sup>C NMR (100.66 MHz, CDCl<sub>3</sub>):  $\delta$  = 21.73 (q), 111.25 (d), 116.09 (d), 116.31 (d), 121.42 (s), 124.04 (d), 124.45 (d), 124.70 (d, d,  $J$  = 40.6 Hz, 2 C), 126.10 (d), 127.12 (s), 128.74 (d, 2 C), 129.68 (d, 2 C), 134.17 (s), 140.61 (s), 150.52 (s, d,  $J$  = 3.17 Hz), 153.89 (s), 157.80 (s), 164.04 (s, d,  $J$  = 251 Hz) ppm; <sup>19</sup>F NMR (282.76 MHz, CDCl<sub>3</sub>):  $\delta$  = -110.70 (s) ppm; HRMS (EI (+), 70 eV) C<sub>21</sub>H<sub>15</sub>FN<sub>2</sub>O [M]<sup>+</sup>: calcd. 330.11629, found 330.11684.

1.4.3.8) 3-Phenyl-2-(*p*-tolyl)benzofuran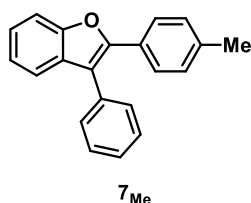

Ph<sub>3</sub>PAuCl (9.89 mg, 20.0  $\mu$ mol, 10.0 mol-%), NaHCO<sub>3</sub> (33.6 mg, 400  $\mu$ mol, 2.00 eq), benzenediazonium tetrafluoroborate **2<sub>H</sub>** (76.8 mg, 400  $\mu$ mol, 2.00 eq) and *o*-(*p*-tolylethynyl)phenol **6<sub>Me</sub>** (41.7 mg, 200  $\mu$ mol, 1.00 eq) were dissolved in 2.00 mL acetonitrile and the mixture was stirred for two hours under blue-LED irradiation (450 nm) at room temperature. The mixture was evaporated onto Celite® and purification by flash column chromatography (SiO<sub>2</sub>, PE) yielded the product **7<sub>Me</sub>** (36.5 mg, 128  $\mu$ mol, 64%) as a colorless solid (5.00 mol% catalyst: 29.0 mg, 102  $\mu$ mol, 51%).

R<sub>f</sub> (SiO<sub>2</sub>, PE) = 0.30; <sup>1</sup>H NMR (399.82 MHz, CDCl<sub>3</sub>):  $\delta$  = 2.35 (s, 3 H), 7.13 (d,  $J$  = 7.97 Hz, 2 H), 7.23 (td,  $J$  = 7.46 Hz,  $J$  = 1.06 Hz, 1 H), 7.29-7.35 (m, 1 H), 7.37-7.57 (m, 9 H) ppm. Its spectroscopic data matches with previously reported data.<sup>[12]</sup>

1.4.3.9) 2,3-Di-*p*-tolylbenzofuran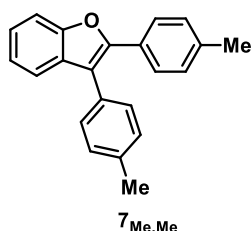

$\text{Ph}_3\text{PAuCl}$  (5.0 mg, 10.1  $\mu\text{mol}$ , 5.05 mol-%),  $\text{NaHCO}_3$  (33.5 mg, 399  $\mu\text{mol}$ , 1.99 eq), 4-tolyldiazonium tetrafluoroborate **2<sub>Me</sub>** (82.4 mg, 400  $\mu\text{mol}$ , 2.00 eq) and *o*-(*p*-tolylethynyl)phenol **6<sub>Me</sub>** (41.7 mg, 200  $\mu\text{mol}$ , 1.00 eq) were dissolved in 1.00 mL acetonitrile and the mixture was stirred for two hours under blue-LED irradiation (450 nm) at room temperature. Reaction control *via* TLC-plate showed starting material left. Therefore the mixture was again irradiated with 450 nm blue LED for two hours at room temperature. The mixture was evaporated onto Celite<sup>®</sup> and purification by flash column chromatography ( $\text{SiO}_2$ , PE) yielded the product **7<sub>Me,Me</sub>** (27.6 mg, 92.5  $\mu\text{mol}$ , 46%) as a colorless solid.

$R_f$  ( $\text{SiO}_2$ , PE) = 0.24;  $^1\text{H NMR}$  (399.82 MHz,  $\text{CDCl}_3$ ):  $\delta$  = 2.33 (s, 3 H), 2.42 (s, 3 H), 7.11 (d,  $J$  = 7.95 Hz, 2 H), 7.16-7.33 (m, 4 H), 7.34-7.40 (m, 2 H), 7.43-7.49 (m, 1 H), 7.50-7.58 (m, 3 H) ppm. Its spectroscopic data matches with previously reported data.<sup>[13]</sup>

1.4.3.10) 3-(4-Fluorophenyl)-2-(*p*-tolyl)benzofuran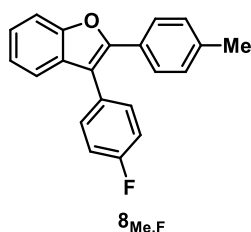

$\text{Ph}_3\text{PAuCl}$  (5.0 mg, 10.1  $\mu\text{mol}$ , 5.05 mol-%),  $\text{NaHCO}_3$  (33.5 mg, 399  $\mu\text{mol}$ , 1.99 eq), 4-fluorobenzenediazonium tetrafluoroborate **2<sub>F</sub>** (82.4 mg, 393  $\mu\text{mol}$ , 1.96 eq) and *o*-(*p*-tolylethynyl)phenol **6<sub>Me</sub>** (41.6 mg, 200  $\mu\text{mol}$ , 1.00 eq) were dissolved in 1.00 mL acetonitrile and the mixture was stirred for two hours under blue-LED irradiation (450 nm) at room temperature. The mixture was evaporated onto Celite<sup>®</sup> and purification by flash column chromatography ( $\text{SiO}_2$ , PE) yielded the product **8<sub>Me,F</sub>** (31.8 mg, 105  $\mu\text{mol}$ , 53%) as a colorless solid.

$R_f$  ( $\text{SiO}_2$ , PE) = 0.33;  $^1\text{H NMR}$  (399.82 MHz,  $\text{CDCl}_3$ ):  $\delta$  = 2.36 (s, 3 H), 7.12-7.19 (m, 4 H), 7.22-7.26 (m, 1 H), 7.33 (ddd,  $J$  = 8.26 Hz,  $J$  = 7.20 Hz,  $J$  = 1.35 Hz, 1 H), 7.42-7.50 (m, 3 H), 7.50-7.57 (m, 3 H) ppm;  $^{19}\text{F NMR}$  (376.17 MHz,  $\text{CDCl}_3$ ):  $\delta$  = -114.45 (s) ppm. Its spectroscopic data matches with previously reported data.<sup>[14]</sup>

1.4.3.11) 3-(4-Nitrophenyl)-2-(*p*-tolyl)benzofuran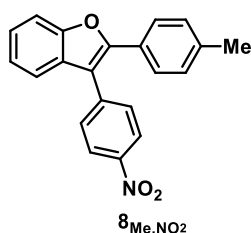

$\text{Ph}_3\text{PAuCl}$  (5.0 mg, 10.1  $\mu\text{mol}$ , 5.05 mol-%),  $\text{NaHCO}_3$  (33.5 mg, 399  $\mu\text{mol}$ , 1.99 eq), 4-nitrobenzenediazonium tetrafluoroborate **2<sub>NO2</sub>** (94.9 mg, 401  $\mu\text{mol}$ , 1.00 eq) and *o*-(*p*-tolylethynyl)phenol **6<sub>Me</sub>** (41.7 mg, 200  $\mu\text{mol}$ , 1.00 eq) were dissolved in 1.00 mL acetonitrile and the mixture was stirred for two hours under blue-LED irradiation (450 nm) at room temperature.

The mixture was evaporated onto Celite<sup>®</sup>. Purification by flash column chromatography (SiO<sub>2</sub>, PE/EA 250:1) yielded the product **8**<sub>Me,NO<sub>2</sub></sub> (21.4 mg, 65.0 μmol, 32%) as a yellow, crystalline solid (reaction time 30 min: 22.5 mg, 68.3 μmol, 34%).

R<sub>f</sub> (SiO<sub>2</sub>, PE/EA, 100/1) = 0.43; <sup>1</sup>H NMR (399.82 MHz, CDCl<sub>3</sub>): δ = 2.37 (s, 3 H), 7.17 (d, J = 7.91 Hz, 2 H), 7.26-7.33 (m, 1 H), 7.37 (ddd, J = 8.14 Hz, J = 7.15 Hz, J = 1.22 Hz, 1 H), 7.50 (dd, J = 7.93 Hz, J = 5.59 Hz, 3 H), 7.58 (dt, J = 8.08 Hz, J = 0.94 Hz, 1 H), 7.65-7.73 (m, 2 H), 8.28-8.35 (m, 2 H) ppm. Its spectroscopic data matches with previously reported data.<sup>[15]</sup>

#### 1.4.3.12) Irradiation of 3-(4-Nitrophenyl)-2-(p-tolyl)benzofuran with diazonium salt

Due to the low yields of arylation, we dissolved 3-(4-Nitrophenyl)-2-(p-tolyl)benzofuran **8**<sub>Me,NO<sub>2</sub></sub> (10.6 mg, 32.2 μmol, 1.00 eq) and 4-nitrobenzenediazonium tetrafluoroborate **2**<sub>NO<sub>2</sub></sub> (8.4 mg, 35.4 μmol, 1.10 eq) in 400 μL CD<sub>3</sub>CN and the mixture was irradiated for two hours with blue-LED (450 nm). The solution turned from yellow before to dark brown after irradiation (see **Figure S 1**). The <sup>1</sup>H NMR spectrum shows that the excess of diazonium salt leads to consumption of benzofuran **8**<sub>Me,NO<sub>2</sub></sub>, which might result in further arylation processes and/or in the decomposition of **8**<sub>Me,NO<sub>2</sub></sub>.

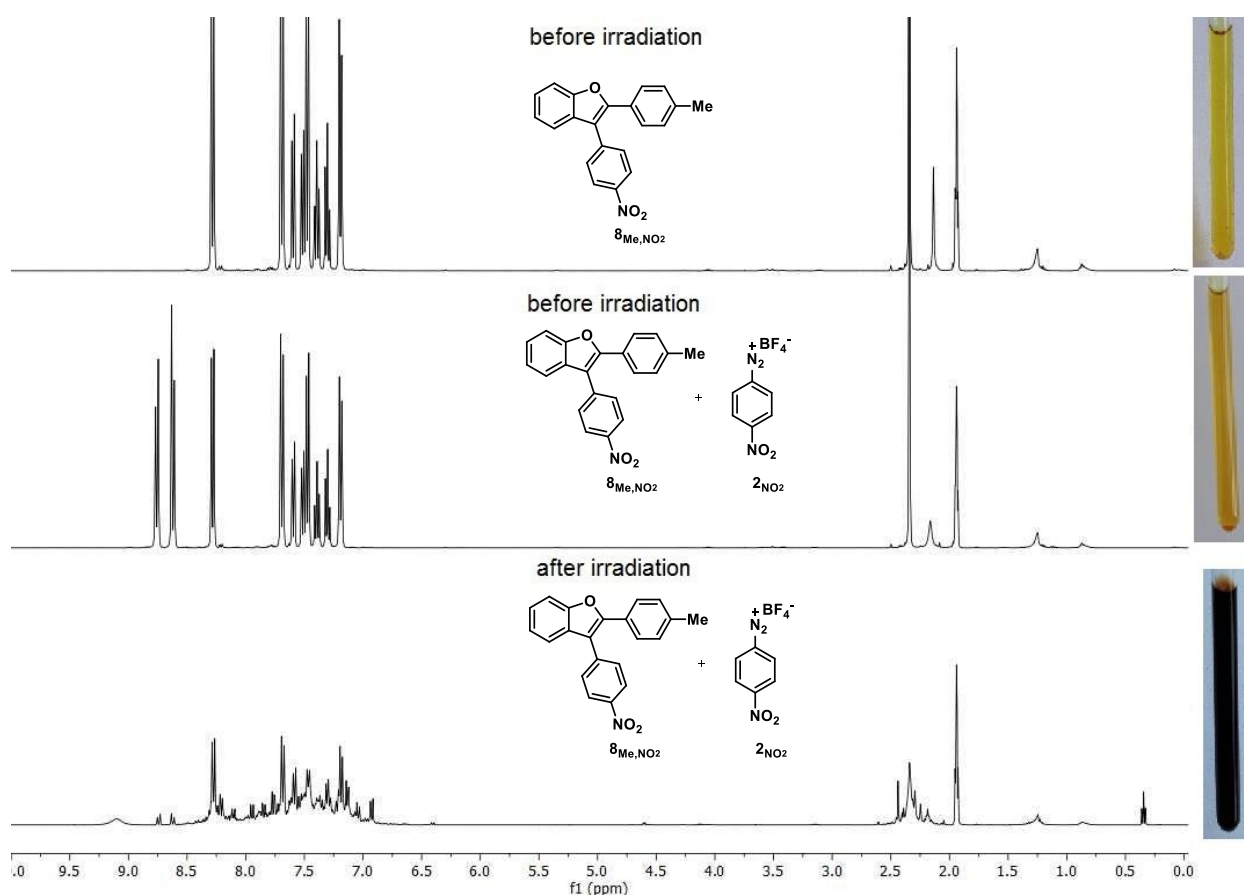

**Figure S 1:** <sup>1</sup>H NMR (399.82 MHz, CD<sub>3</sub>CN) of **8**<sub>Me,NO<sub>2</sub></sub>.

## 1.5) Control Experiments

### 1.5.1) Arylated Benzofuran

Starting material (100  $\mu\text{mol}$ ), catalyst (5.00 mol-%), base (200  $\mu\text{mol}$ ), diazonium salt (200  $\mu\text{mol}$ ) and hexamethylbenzene (100  $\mu\text{mol}$ ) were dissolved in 1.00 mL acetonitrile. The mixture was stirred at room temperature under irradiation with blue LED (450 nm) for two hours. The mixture was filled up to 5.00 mL and an aliquot was taken for GC MS analysis. The yields were determined *via* internal standard and the response factor was determined with an external five-point calibration curve.

**Table S 1:** Control experiments for the formation of arylated benzofurans.

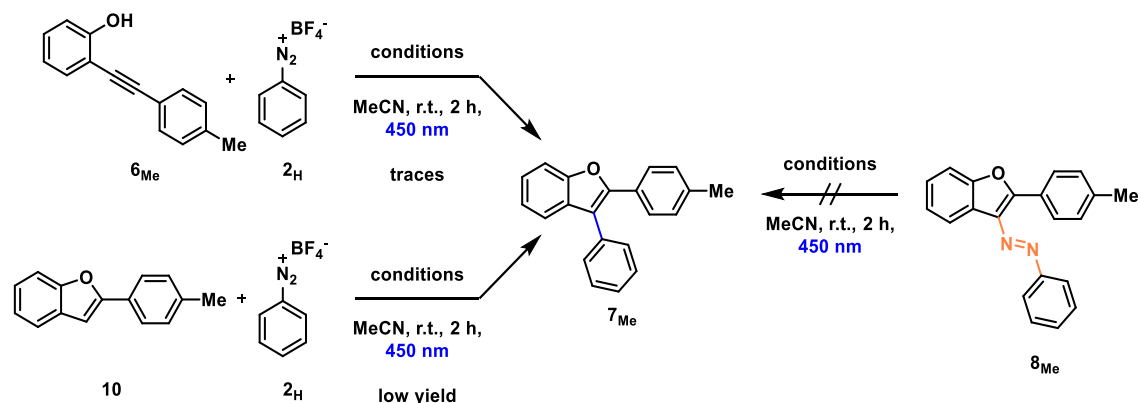

| Entry | Starting Material                    | Catalyst                            | Base               | Yield <b>7<sub>Me</sub></b> [%]<br>Irradiation |
|-------|--------------------------------------|-------------------------------------|--------------------|------------------------------------------------|
| 1     | <b>6<sub>Me</sub></b>                | No                                  | No                 | Not observed                                   |
| 2     | <b>6<sub>Me</sub></b>                | No                                  | NaHCO <sub>3</sub> | < 5                                            |
| 3     | <b>10</b>                            | No                                  | No                 | 5                                              |
| 4     | <b>10</b>                            | No                                  | NaHCO <sub>3</sub> | 17                                             |
| 5     | <b>10</b>                            | Ph <sub>3</sub> PAuNTf <sub>2</sub> | NaHCO <sub>3</sub> | 15                                             |
| 6     | <b>6<sub>Me</sub></b>                | HBF <sub>4</sub> <sup>(a)</sup>     | No                 | < 5                                            |
| 7     | <b>6<sub>Me</sub></b>                | AgNTf <sub>2</sub> <sup>(b)</sup>   | NaHCO <sub>3</sub> | < 5                                            |
| 8     | <b>8<sub>Me</sub></b> <sup>(c)</sup> | No                                  | No                 | Not observed                                   |
| 9     | <b>8<sub>Me</sub></b> <sup>(d)</sup> | Ph <sub>3</sub> PAuNTf <sub>2</sub> | NaHCO <sub>3</sub> | Not observed                                   |

(a) 7.7 mol-% HBF<sub>4</sub>. (b) 6.2 mol-% AgNTf<sub>2</sub>. (c) 30  $\mu\text{mol}$  in 200  $\mu\text{L}$  MeCN. (d) 50  $\mu\text{mol}$  in 500  $\mu\text{L}$  MeCN, 100  $\mu\text{mol}$  base, no diazonium salt added.

Without catalyst, the arylation did not take place by simply adding diazonium salt (entry 1), but is observed in traces (<5%) by adding base (entry 2). If benzofuran **10** is used as starting material, small amounts of the arylated product **7<sub>Me</sub>** were observed by simply adding diazonium salt (entry 3). Low yields of product were formed with adding NaHCO<sub>3</sub> (entry 4), additionally adding Ph<sub>3</sub>PAuNTf<sub>2</sub> (entry 5) did not affect the yield. Product **7<sub>Me</sub>** was formed in traces using AgNTf<sub>2</sub> (entry 7) and HBF<sub>4</sub> as catalyst (entry 6). No product could be observed irradiating solely azobenzofuran **8<sub>Me</sub>** and azobenzofuran **8<sub>Me</sub>** under reaction conditions (entry 8 and 9).

## 1.5.2) Azocompound

Starting material (50.0  $\mu\text{mol}$ ), base (100  $\mu\text{mol}$ ) and diazonium salt (100  $\mu\text{mol}$ ) were dissolved in 100  $\mu\text{L}$  of a stock solution of catalyst (25.0  $\mu\text{mol}/\text{mL}$  in dichloromethane) and molecular sieves (3  $\text{\AA}$ ) was added. 400  $\mu\text{L}$  Dichloromethane was added and the mixture was stirred for 24 hours at room temperature. The solvents were evaporated and the crude product was dried at the Schlenk line. The solid was recorded in 600  $\mu\text{L}$   $\text{CDCl}_3$  and treated with 7.00  $\mu\text{L}$  benzylacetate. The yields were determined *via*  $^1\text{H}$  NMR spectroscopy.

**Table S 2:** Control experiments for the formation of azobenzofurans.

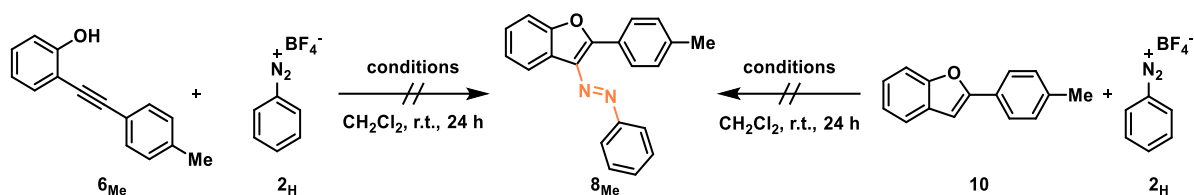

| Entry | Starting Material     | Catalyst                          | Base | Yield <b>8<sub>Me</sub></b> [%]<br>No irradiation |
|-------|-----------------------|-----------------------------------|------|---------------------------------------------------|
| 1     | <b>6<sub>Me</sub></b> | No                                | No   | Not observed                                      |
| 2     | <b>6<sub>Me</sub></b> | No                                | DTBP | Not observed <sup>(a)</sup>                       |
| 3     | <b>10</b>             | No                                | DTBP | Not observed                                      |
| 4     | <b>10</b>             | $\text{Ph}_3\text{PAuNTf}_2$      | DTBP | Not observed                                      |
| 5     | <b>6<sub>Me</sub></b> | $\text{HBF}_4$ <sup>(b,c)</sup>   | No   | Not observed                                      |
| 6     | <b>6<sub>Me</sub></b> | $\text{AgNTf}_2$ <sup>(b,d)</sup> | DTBP | Not observed                                      |

(a) Different substituted azocompound observed (see 1.5.2.1)), (b) 4 eq of **2<sub>H</sub>**. (c) 15.3 mol-%  $\text{HBF}_4$ . (d) 6.7 mol-%  $\text{AgNTf}_2$ .

Azocompound **8<sub>Me</sub>** could not be obtained if the reaction was carried out in the absence of a catalyst and base (entry 1). No product formation took place when using 2-(*p*-tolyl)benzofuran **10** as substrate with or without a catalyst (entries 3 and 4). If the reaction was carried out with DTBP using no catalyst, a different substituted azobenzofuran **14** could be isolated in low yield after 19 days of reaction time (~23%, entry 2, see 1.5.2.1)). No product was formed using neither  $\text{AgNTf}_2$  (entry 6), nor  $\text{HBF}_4$  (entry 5) as catalysts.

## 1.5.2.1) (E)-4-(Phenyldiazenyl)-2-(p-tolylethynyl)phenol

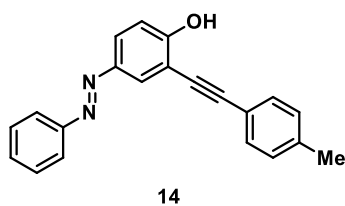

According to **GP C**, 2-(*p*-tolylethynyl)phenol **6<sub>Me</sub>** (52.2 mg, 250  $\mu$ mol, 1.00 eq) and 2,6-di*tert*butylpyridine (113  $\mu$ L, 95.7 mg, 500  $\mu$ mol, 2.00 eq) were dissolved in 2.00 mL dichloromethane and stirred at room temperature for ten minutes. Benzenediazonium tetrafluoroborate **2<sub>H</sub>** (96.2 mg, 501  $\mu$ mol, 2.00 eq) was added and the mixture was stirred at room temperature for 19 days and stopped. The mixture was evaporated onto Celite<sup>®</sup> and purification by flash column chromatography (SiO<sub>2</sub>, PE/EA, 100:1 => 10/1) yielded the product **14** (17.6 mg, 56.3  $\mu$ mol, 23%) as a moderately pure, orange solid.

$R_f$  (SiO<sub>2</sub>, PE/EA, 10:1) = 0.23; <sup>1</sup>H NMR (299.95 MHz, CDCl<sub>3</sub>):  $\delta$  = 2.39 (s, 3 H), 6.17 (bs, 1 H), 7.09-7.14 (m, 1 H), 7.19-7.23 (m, 2 H), 7.43-7.56 (m, 5 H), 7.88-7.94 (m, 3 H), 8.06 (d,  $J$  = 2.36 Hz, 1 H) ppm.

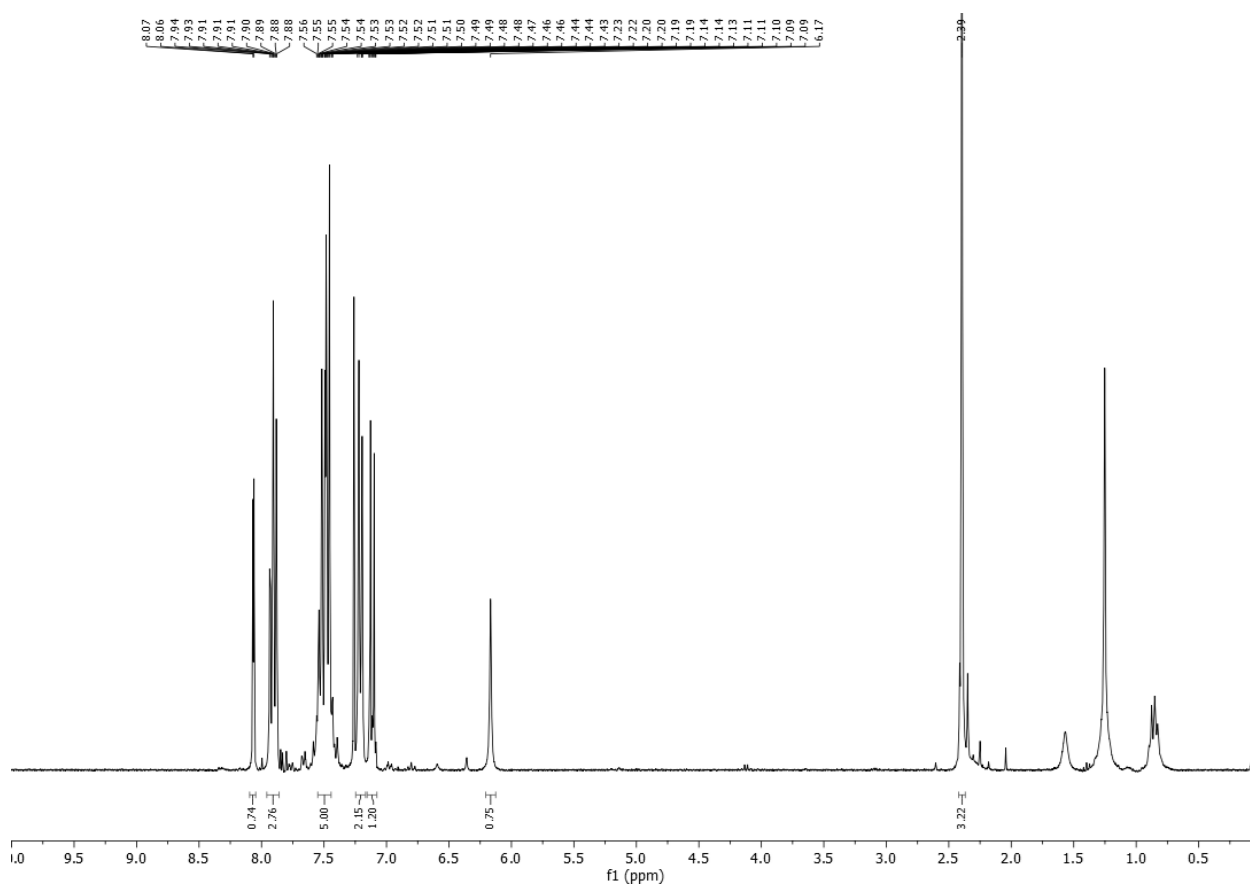

Figure S 2: <sup>1</sup>H NMR spectrum (299.95 MHz, CDCl<sub>3</sub>) of **14**.

## 1.6) Synthesis of Gold(I) Complex

### 1.6.1.1) (2-(*p*-Tolyl)benzofuran-3-yl)(triphenyl- $\lambda^5$ -phosphanyl) gold(I)

Vinyl gold(I) complex **9** was synthesized according to a modified procedure previously reported by Hashmi and co-workers.<sup>[16]</sup>

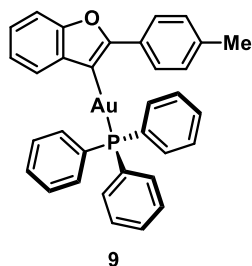

In a heat-gun dried Schlenk tube under an atmosphere of nitrogen,  $\text{Ph}_3\text{PAuCl}$  (146 mg, 294  $\mu\text{mol}$ , 1.00 eq) and AgOTs (82.1 mg, 294  $\mu\text{mol}$ , 1.00 eq) were dissolved in 50.0 mL THF and stirred for one hour at room temperature. Triethylamine (297  $\mu\text{L}$ , 208 mg, 2.08 mmol, 7.00 eq) and 2-((4-methylphenyl)ethynyl)phenol **6<sub>Me</sub>** (62.5 mg, 300  $\mu\text{mol}$ , 1.02 eq) were added and the mixture was stirred for 19 hours under exclusion of light.

The mixture was filtered through a pad of neutral  $\text{Al}_2\text{O}_3$  and evaporated at room temperature. The crude solid was recrystallized from dichloromethane/pentane, filtered, washed with pentane and yielded the product **9** (166 mg, 249  $\mu\text{mol}$ , 85%) as a colorless, crystalline solid.

M.p.: decomp  $>181$  °C; IR(ATR):  $\tilde{\nu}$  = 693, 710, 741, 748, 822, 886, 920, 969, 997, 1012, 1029, 1069, 1100, 1158, 1180, 1200, 1251, 1264, 1281, 1308, 1331, 1338, 1433, 1447, 1465, 1479, 1490, 2918, 3014, 3046, 3067  $\text{cm}^{-1}$ ;  $^1\text{H}$  NMR (600.13 MHz,  $\text{CD}_2\text{Cl}_2$ ):  $\delta$  = 2.37 (s, 3 H), 7.09-7.19 (m, 4 H), 7.46 (d,  $J$  = 7.95 Hz, 1 H), 7.49-7.59 (m, 9 H), 7.64-7.70 (m, 6 H), 7.73-7.79 (m, 1 H), 8.33 (d,  $J$  = 7.97 Hz, 2 H) ppm;  $^{13}\text{C}$  NMR (150.92 MHz,  $\text{CD}_2\text{Cl}_2$ ):  $\delta$  = 21.42 (q), 110.57 (d), 121.79 (d), 123.50 (d), 124.78 (d), 125.71 (d, 2 C), 129.25 (d, 2 C), 129.57 (d, 3 C), 129.64 (d, 3 C), 131.13 (s, d,  $J$  = 52.0 Hz), 131.74 (s), 131.83 (d, d,  $J$  = 2.42 Hz, 3 C), 134.54 (s), 134.72 (d, 3 C), 134.81 (d, 3 C), 137.57 (s), 139.74 (s, 3 C), 155.38 (s, d,  $J$  = 3.86 Hz), 161.43 (s, d,  $J$  = 8.54 Hz) ppm;  $^{31}\text{P}$  NMR (242.92 MHz,  $\text{CD}_2\text{Cl}_2$ ):  $\delta$  = 45.22 ppm; HR-DART (+)  $\text{C}_{33}\text{H}_{26}\text{AuOP}$   $[\text{M}]^+$ : calcd. 666.1381, found 666.1374.

## 1.6.2) Reactions of Vinyl Gold(I) Complex

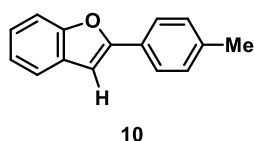

Vinyl gold(I) complex **9** (20.0 mg, 30.0  $\mu\text{mol}$ , 1.00 eq) was dissolved in 500  $\mu\text{L}$   $\text{CD}_2\text{Cl}_2$  and 2-((4-methylphenyl)ethynyl)phenol **6<sub>Me</sub>** (6.9 mg, 33.0  $\mu\text{mol}$ , 1.10 eq) was added. The solution was mixed constantly by a rotating machine for 30 hours. 4  $\mu\text{L}$  Benzylacetate was added as internal standard and the  $^1\text{H}$  NMR spectrum was recorded. Product **10** was formed with 16% conversion.

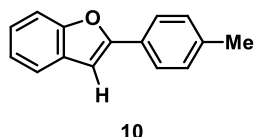

Vinyl gold(I) complex **9** (20.2 mg, 30.3  $\mu\text{mol}$ , 1.01 eq) was dissolved in 500  $\mu\text{L}$   $\text{CD}_2\text{Cl}_2$  and phenol (3.3 mg, 35.0  $\mu\text{mol}$ , 1.17 eq) was added. The solution was mixed constantly by a rotating machine for 26 hours. 4  $\mu\text{L}$  Benzylacetate was added as internal standard and the  $^1\text{H}$  NMR spectrum was recorded. Product **10** was formed with 54% yield.

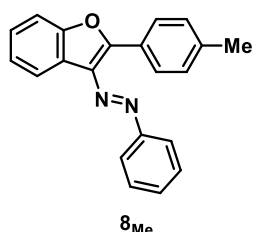

Vinyl gold(I) complex **9** was dissolved in 500  $\mu\text{L}$   $\text{CD}_2\text{Cl}_2$  and benzenediazonium tetrafluoroborate **2<sub>H</sub>** was added. The solution was mixed constantly by a rotating machine for 24 hours. 4  $\mu\text{L}$  Benzylacetate was added as internal standard and the  $^1\text{H}$  NMR spectrum was recorded. Product **8<sub>Me</sub>** was formed with an average yield of 46% (double determination).

**A)** **9** (20.0 mg, 30.0  $\mu\text{mol}$ , 1.00 eq), **2<sub>H</sub>** (6.4 mg, 33.5  $\mu\text{mol}$ , 1.12 eq). Yield: 49%

**B)** **9** (20.0 mg, 30.0  $\mu\text{mol}$ , 1.00 eq), **2<sub>H</sub>** (6.3 mg, 33.0  $\mu\text{mol}$ , 1.10 eq). Yield: 44%

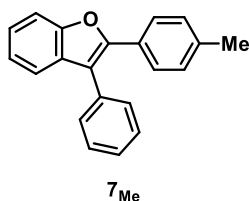

Vinyl gold(I) complex **9** was dissolved in 500  $\mu\text{L}$  acetonitrile, benzenediazonium tetrafluoroborate **2<sub>H</sub>** and hexamethylbenzene (internal standard) were added. The mixture was irradiated with 450 nm blue LED at room temperature for two hours, analyzed *via* GC-MS and product **7<sub>Me</sub>** was formed with an average yield of 65% (double determination).

**A)** **9** (20.0 mg, 30.0  $\mu\text{mol}$ , 1.00 eq), **2<sub>H</sub>** (6.3 mg, 33.0  $\mu\text{mol}$ , 1.10 eq), HMB (4.7 mg, 29.0  $\mu\text{mol}$ , 0.96 eq). Yield **7<sub>Me</sub>**: 69%, yield **10**: 33%.

**B)** **9** (20.1 mg, 30.2  $\mu\text{mol}$ , 1.01 eq), **2<sub>H</sub>** (6.8 mg, 35.5  $\mu\text{mol}$ , 1.20 eq), HMB (4.7 mg, 29.0  $\mu\text{mol}$ , 0.96 eq). Yield **7<sub>Me</sub>**: 62%, yield **10**: 8%.



### 1.7) Irradiation of $\text{Ph}_3\text{PAuCl}/\text{Ph}_3\text{PAuNTf}_2$ with *p*-Tolyldiazonium tetrafluoroborate

$\text{Ph}_3\text{PAuCl}$  (12.4 mg, 25.1  $\mu\text{mol}$ , 1.00 eq),  $\text{NaHCO}_3$  (2.1 mg, 25.0  $\mu\text{mol}$ , 1.00 eq) and *p*-tolylidiazonium tetrafluoroborate **2<sub>Me</sub>** (5.2 mg, 26.8  $\mu\text{mol}$ , 1.07 eq) were dissolved in 200  $\mu\text{L}$   $\text{CD}_3\text{CN}$  and 4  $\mu\text{L}$  tetrachloroethane as internal standard were added. The solution was irradiated with a 405 nm LED light source for 144 min and the reaction was monitored every 36 s via  $^1\text{H}$  NMR spectroscopy (499.86 MHz).

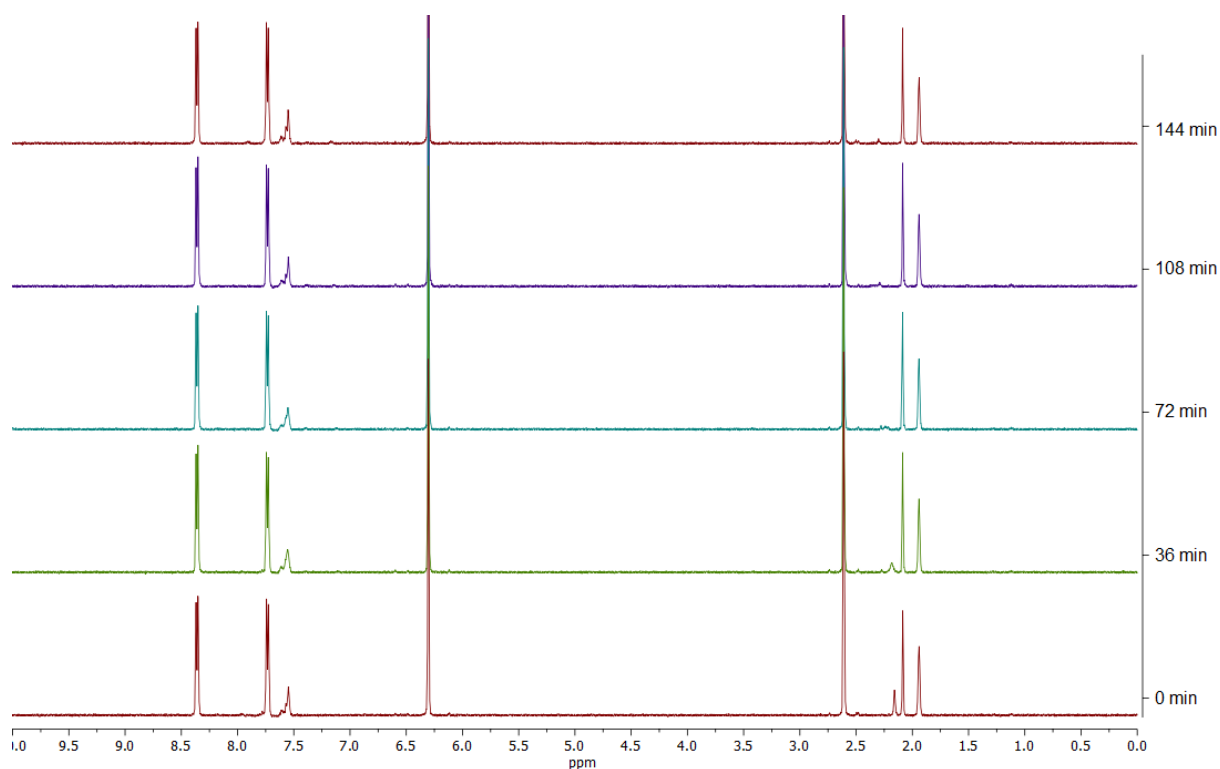

**Figure S 3:**  $^1\text{H}$  NMR (499.86 MHz,  $\text{CD}_3\text{CN}$ ) of  $\text{Ph}_3\text{PAuCl}$  with **2<sub>Me</sub>** and  $\text{NaHCO}_3$  at different times of irradiation, using tetrachloroethane as internal standard.

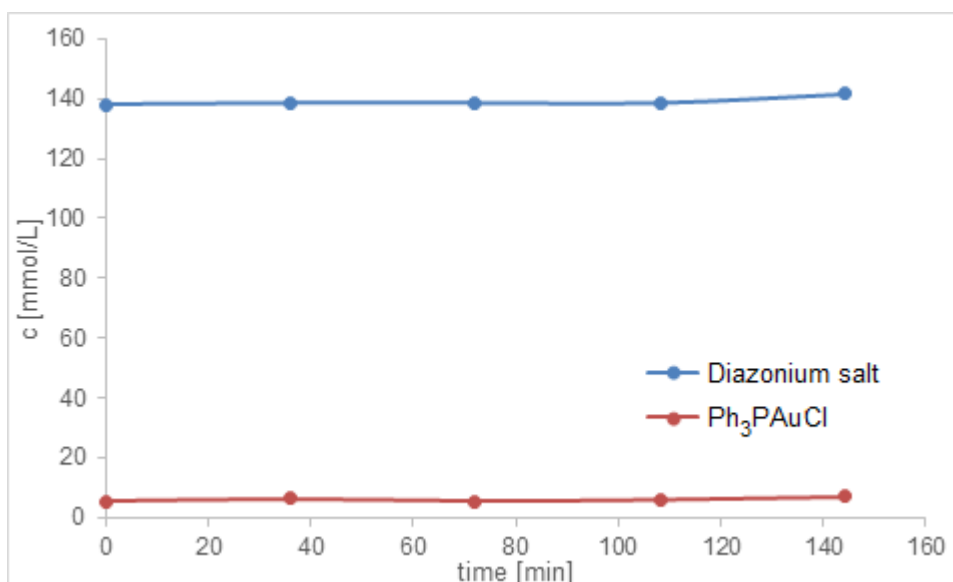

**Figure S 4:** Time-dependent change of concentration of the reaction of Ph<sub>3</sub>PAuCl with **2**<sub>Me</sub> and NaHCO<sub>3</sub> while being irradiated with a 405 nm blue LED lamp, determined by <sup>1</sup>H NMR (499.86 MHz, CD<sub>3</sub>CN) using tetrachloroethane as internal standard.

As seen in **Figure S 4**, the concentration of Ph<sub>3</sub>PAuCl in the sample is very low with, due to its poor solubility in CD<sub>3</sub>CN. Ph<sub>3</sub>PAuNTf<sub>2</sub> is fully soluble in CD<sub>3</sub>CN (see **Figure S 5**), therefore we irradiated a similar sample using Ph<sub>3</sub>PAuNTf<sub>2</sub>, with and without NaHCO<sub>3</sub>.

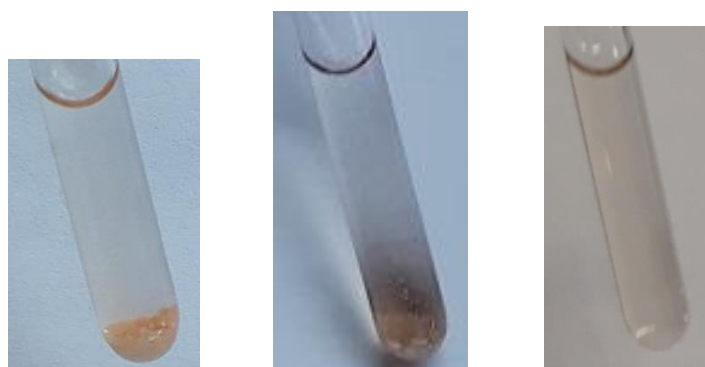

**Figure S 5:** Samples before irradiation. Left: Ph<sub>3</sub>PAuCl (insoluble), *p*-tolylidiazonium tetrafluoroborate **2**<sub>Me</sub> (soluble), NaHCO<sub>3</sub> in CD<sub>3</sub>CN. Middle: Ph<sub>3</sub>PAuNTf<sub>2</sub> (soluble), *p*-tolylidiazonium tetrafluoroborate **2**<sub>Me</sub> (soluble), NaHCO<sub>3</sub> (insoluble) in CD<sub>3</sub>CN. Right: Ph<sub>3</sub>PAuNTf<sub>2</sub> (soluble), *p*-tolylidiazonium tetrafluoroborate **2**<sub>Me</sub> (soluble) in CD<sub>3</sub>CN.

Ph<sub>3</sub>PAuNTf<sub>2</sub> (18.8 mg, 25.4 μmol, 1.02 eq), NaHCO<sub>3</sub> (2.1 mg, 25.0 μmol, 1.00 eq) and *p*-tolylidiazonium tetrafluoroborate **2**<sub>Me</sub> (5.2 mg, 25.2 μmol, 1.01 eq) were dissolved in 200 μL CD<sub>3</sub>CN and 4 μL tetrachloroethane as internal standard were added. The solution was irradiated with a 405 nm LED lamp for 144 min and the reaction was monitored every 36 s via <sup>1</sup>H NMR spectroscopy (499.86 MHz).

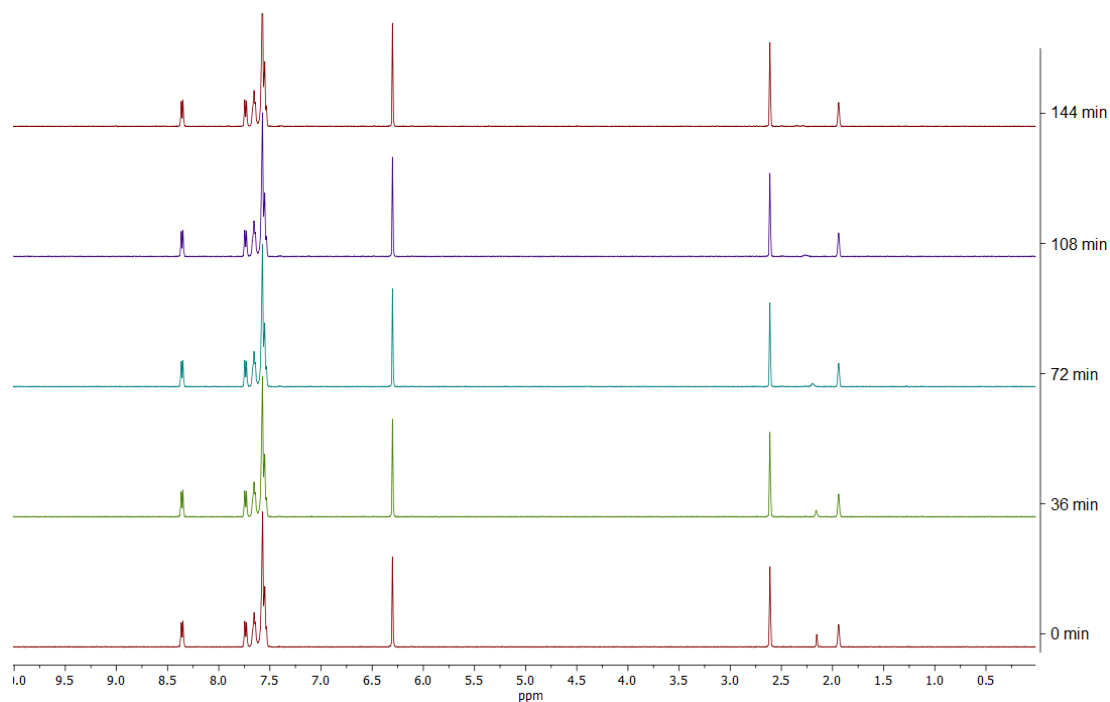

**Figure S 6:** <sup>1</sup>H NMR (499.86 MHz, CD<sub>3</sub>CN) of Ph<sub>3</sub>PAuNTf<sub>2</sub> with **2**<sub>Me</sub> and NaHCO<sub>3</sub> at different times of irradiation, using tetrachloroethane as internal standard.

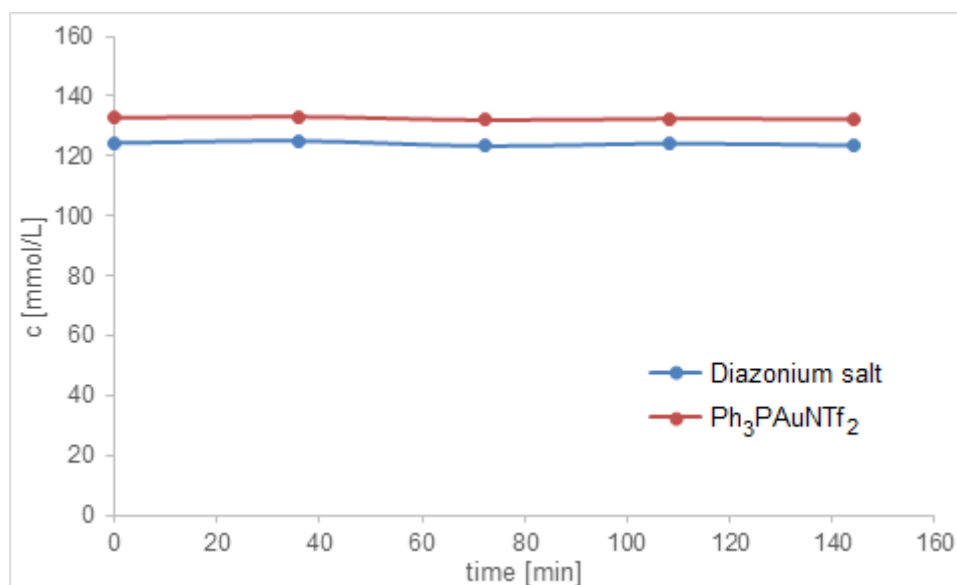

**Figure S 7:** Time-dependent concentration of the reaction of Ph<sub>3</sub>PAuNTf<sub>2</sub> with **2**<sub>Me</sub> and NaHCO<sub>3</sub> while being irradiated with a 405 nm blue LED lamp, determined by <sup>1</sup>H NMR (499.86 MHz, CD<sub>3</sub>CN) using tetrachloroethane as internal standard.

Ph<sub>3</sub>PAuNTf<sub>2</sub> (18.8 mg, 25.4 μmol, 1.02 eq) and *p*-tolyldiazonium tetrafluoroborate **2**<sub>Me</sub> (5.2 mg, 25.2 μmol, 1.01 eq) were dissolved in 200 μL CD<sub>3</sub>CN and 4 μL tetrachloroethane as internal

standard were added. The solution was irradiated with a 405 nm LED lamp for 144 min and the reaction was monitored every 36 s via  $^1\text{H}$  NMR spectroscopy (499.86 MHz).

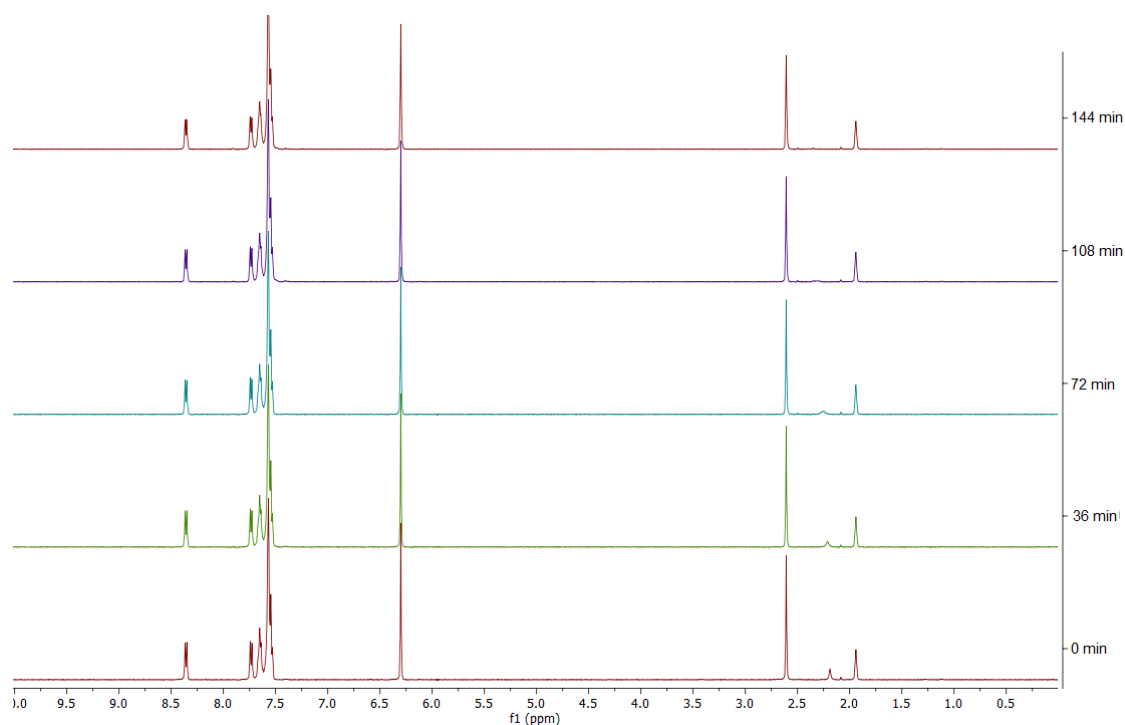

**Figure S 8:**  $^1\text{H}$  NMR (499.86 MHz,  $\text{CD}_3\text{CN}$ ) of  $\text{Ph}_3\text{PAuNTf}_2$  with  $\mathbf{2}_{\text{Me}}$  at different times of irradiation, using tetrachloroethane as internal standard.

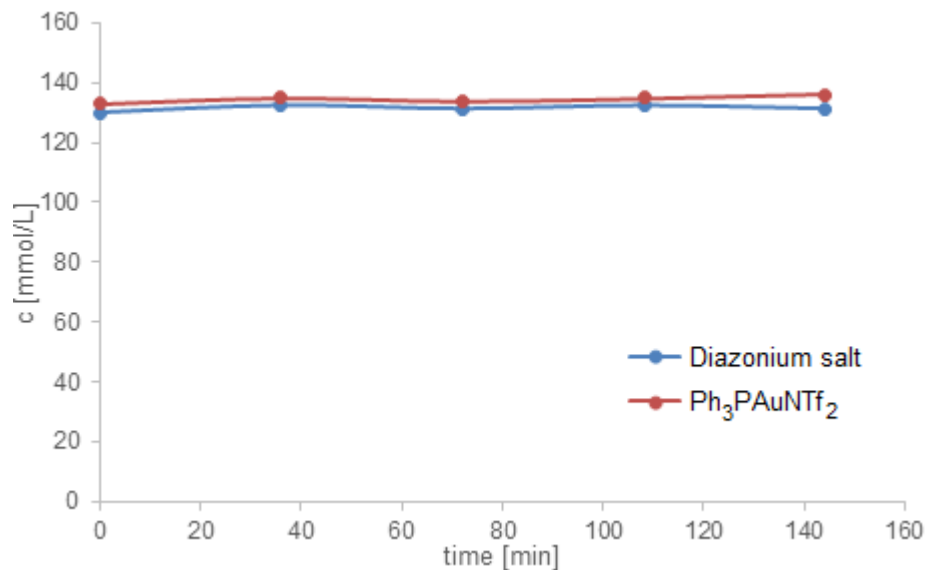

**Figure S 9:** Time-dependent concentration of the reaction of  $\text{Ph}_3\text{PAuNTf}_2$  with  $\mathbf{2}_{\text{Me}}$  while being irradiated with a 405 nm blue LED lamp, determined by  $^1\text{H}$  NMR (499.86 MHz,  $\text{CD}_3\text{CN}$ ) using tetrachloroethane as internal standard.

In all reactions, there was no change in concentration of diazonium salt  $\mathbf{2}_{\text{Me}}$  or gold(I)catalyst observed (see **Figure S 4**, **Figure S 7** and **Figure S 9**).

## 1.8) Computational Details

DFT calculations were carried out using the electronic structure code Gaussian 16 revision B.01.<sup>[17]</sup> Geometries were optimized using the TPSS functional<sup>[18]</sup> in combination with Grimme's empirical dispersion correction D3 including Becke-Johnson damping.<sup>[19]</sup> The def2-SVP basis set<sup>[20]</sup> was used for all elements and calculations were accelerated using density fitting<sup>[21]</sup> in combination with Weigend's universal fitting basis set.<sup>[22]</sup> At these geometries electronic energies for ground and excited states (TD-DFT)<sup>[23]</sup> were computed using the CAM-B3LYP functional<sup>[24]</sup> combined with the D3(BJ) dispersion correction. The def2-SVPD basis set was used including a small set of diffuse basis functions.<sup>[25]</sup> For all calculations, 60 inner electrons were replaced with an effective core potential (ECP) for Au,<sup>[26]</sup> an *ultrafine* integration grid was used and the PCM solvation model<sup>[27]</sup> mimicking MeCN solvation. The def2-SVP and def2-SVPD basis sets including the appropriate ECP were obtained from the *Basis Set Exchange* library.<sup>[28]</sup> Non-covalent complexes were optimized using Gaussian's *loose* convergence criteria. Structural depictions were made using Chemcraft.<sup>[29]</sup>

### 1.8.1) Geometry Donor-Acceptor Complex

In order to probe the conformational space of the donor-acceptor complex we employed Grimme's CREST algorithm (Version 2.7.1)<sup>[30]</sup> using the GFN2-xTB method<sup>[31]</sup> in combination with the generalized born model with solvent accessible surface area (GBSA) for MeCN. For all obtained structures single point calculations were carried out at the TPSS-D3(BJ)/def2-SVP/PCM(MeCN) level of theory. The lowest energy structure was subsequently fully optimized at this level of theory and used for further analysis. We do note here that several energetically similar structures were obtained and that our selection of the lowest energy structure only serves to provide a qualitative answer on the role of a donor-acceptor complex (I) for photochemical activation. From this structure (singlet ground state) we also fully optimized the triplet state for the donor-acceptor complex (II). Structural depictions are shown below in **Figure S 10**.

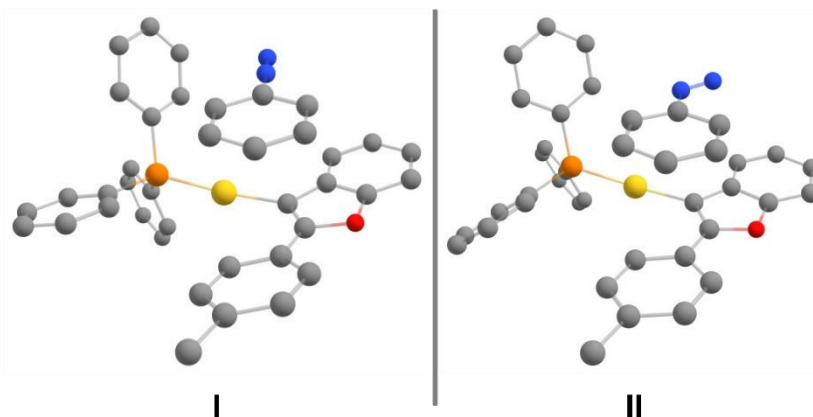

**Figure S 10:** Structural depictions of fully optimized geometries of a donor-acceptor complexes I and II at the TPSS-D3(BJ)/def2-SVP/PCM(MeCN) level of theory.

### 1.8.2) UV-Vis Spectrum Donor-Acceptor Complex

We computed UV-Vis spectra (nstates=50) for the donor-acceptor complex **I** at the TD-CAM-B3LYP-D3(BJ)/def2-SVPD/PCM(MeCN) level of theory. For comparison we also provide computed spectra of the isolated Au complex **9** and the diazonium salt  $\text{PhN}_2^+$ . For complex **I** a low-lying (low intensity) excited state can be found at 624 nm corresponding to charge-transfer from the HOMO located at the vinyl gold(I) complex portion of **I** to the LUMO which is located at the  $\text{PhN}_2^+$  portion (*vide infra*). In contrast, **9** and  $\text{PhN}_2^+$  have their lowest lying excited states at 319 nm and 293 nm, respectively. In addition, for **I** several additional excited states (429, 383, 377, 343 and 320 nm) can be found at lower energy than the lowest-lying excited states of **9** and  $\text{PhN}_2^+$ , supporting that the formation of a donor-acceptor complex leads to a red shift allowing for photochemistry to occur. We shall note here that TD-DFT is prone to over stabilize charge-transfer states,<sup>[32]</sup> even if long-range corrected functionals are employed, and hence the lowest lying excited state for **I** may in fact be closer to the wavelength used for irradiation (450 nm).

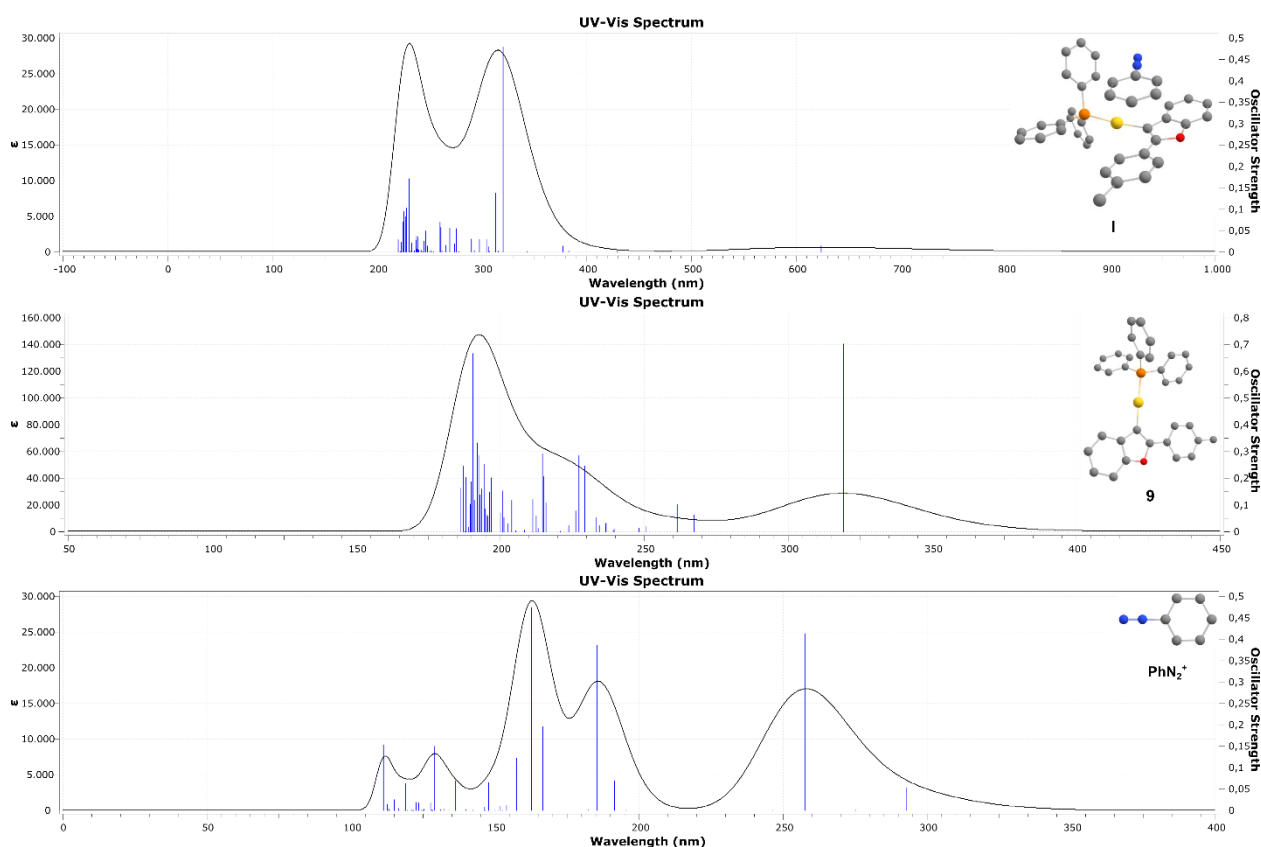

**Figure S 11:** Computed UV-Vis spectra for **I**, **9** and  $\text{PhN}_2^+$  at the TD-CAM-B3LYP-D3(BJ)/def2-SVPD/PCM(MeCN)/TPSS-D3(BJ)/def2-SVP/PCM(MeCN) level of theory. Depicted spectra are generated from the computed line spectra fitting a Gaussian band shape with half-width at half-height of 0.333 eV.

### 1.8.3) Nature of the Excited State and Role for Reactivity

As indicated above, we can identify a low-lying excited state that corresponds to excitation from the HOMO to the LUMO (for depiction of orbitals see **Figure S 12**). In agreement with this attribution the natural transition orbitals (**Figure S 13**) are in excellent agreement with the frontier molecular orbital picture. The excited state lies  $45.8 \text{ kcal mol}^{-1}$  above the ground state for **I**. Notably, the triplet state is energetically favorable and lies  $29.7 \text{ kcal mol}^{-1}$  above the ground state for **I**, and the energy is further lowered to  $13.2 \text{ kcal mol}^{-1}$  with respect to **I** when computed at the fully relaxed triplet geometry **II**. In addition, inspection of the spin density for the triplet state is consistent with charge transfer from the vinyl gold(I) complex portion of **I** to the  $\text{PhN}_2^+$  portion, which is also reflected by the spin population of the fragments (**Figure S 14**). We might therefore outline the following scenario for photochemical activation in the C-C bond forming reaction as follows: (i) initial excitation from the donor-acceptor complex leading to the lowest-lying excited singlet state, (ii) followed by intersystem crossing to the triplet surface and (iii) geometrical relaxation leading to **II** (**Figure S 15**). One notable geometrical feature that changes upon relaxation on the triplet surface is the C-N bond distance in the  $\text{PhN}_2^+$  fragment, which elongates from 1.362 to 1.449 Å. We propose here that the subsequent C-C bond formation takes place on the triplet surface. We also note that we are not precluding that initial excitation may be to a higher-lying excited state, but envision that rapid internal conversion following Kasha's rule would lead to the lowest-lying excited singlet state from which the subsequent changes may occur. The details of these processes, including the role of the heavy element Au for intersystem crossing are subject of future studies.

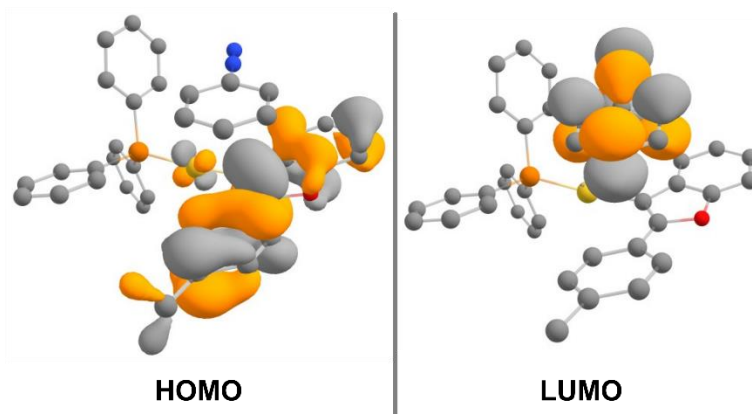

**Figure S 12:** HOMO and LUMO depictions of the donor-acceptor complex **I** at the CAM-B3LYP-D3(BJ)/def2-SVPD/PCM(MeCN)//TPSS-D3(BJ)/def2-SVP/PCM(MeCN) level of theory.

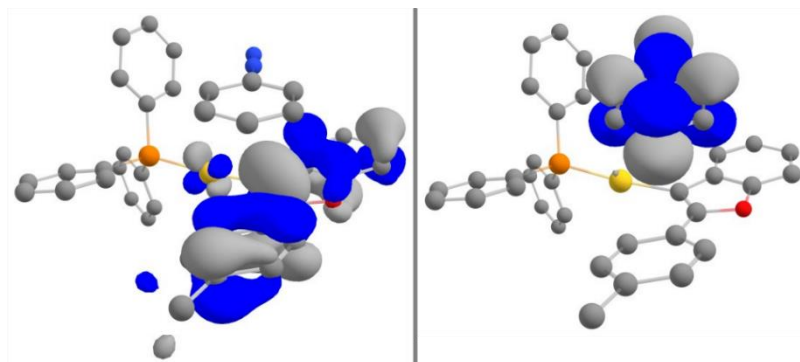

**Figure S 13:** Natural transition orbital depictions for the lowest lying singlet excited state of the donor-acceptor complex **I** at the TD-CAM-B3LYP-D3(BJ)/def2-SVPD/PCM(MeCN)//TPSS-D3(BJ)/def2-SVP/PCM(MeCN) level of theory.

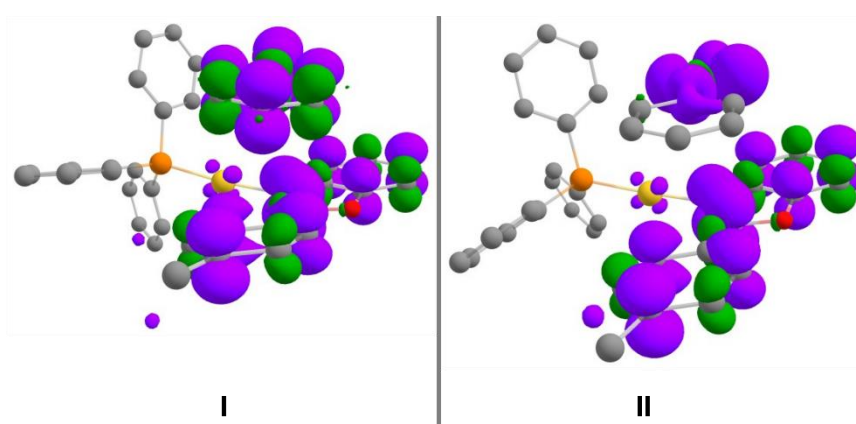

**Figure S 14:** Spin density plots for the triplet states of the donor-acceptor complexes **I** and **II** at the CAM-B3LYP-D3(BJ)/def2-SVPD/PCM(MeCN)//TPSS-D3(BJ)/def2-SVP/PCM(MeCN) level of theory (isosurface 0.003).

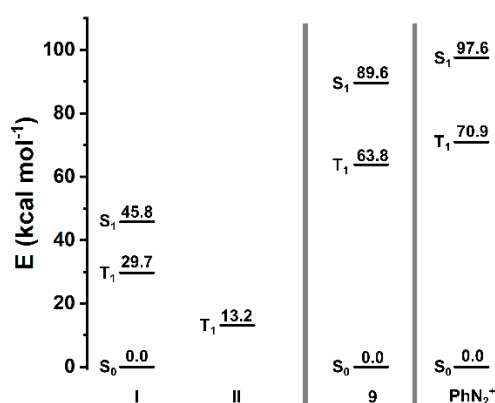

**Figure S 15:** Energy profile for relevant species for the photochemical activation *via* the donor-acceptor complex **I** at the (TD-)CAM-B3LYP-D3(BJ)/def2-SVPD/PCM(MeCN)//TPSS-D3(BJ)/def2-SVP/PCM(MeCN) level of theory.



## 2) Attachment

## 2.1) NMR Spectra

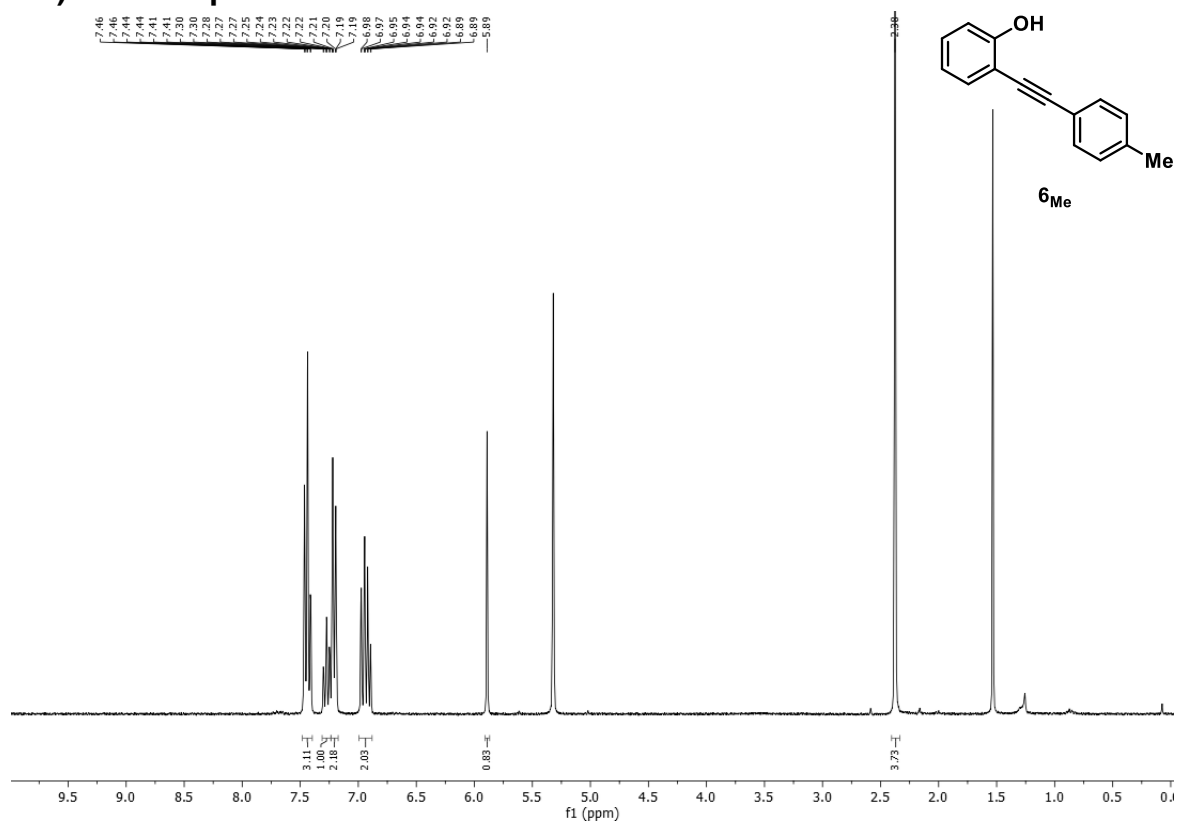Figure S 16: <sup>1</sup>H NMR (299.95 MHz, CDCl<sub>3</sub>) of **6<sub>Me</sub>**.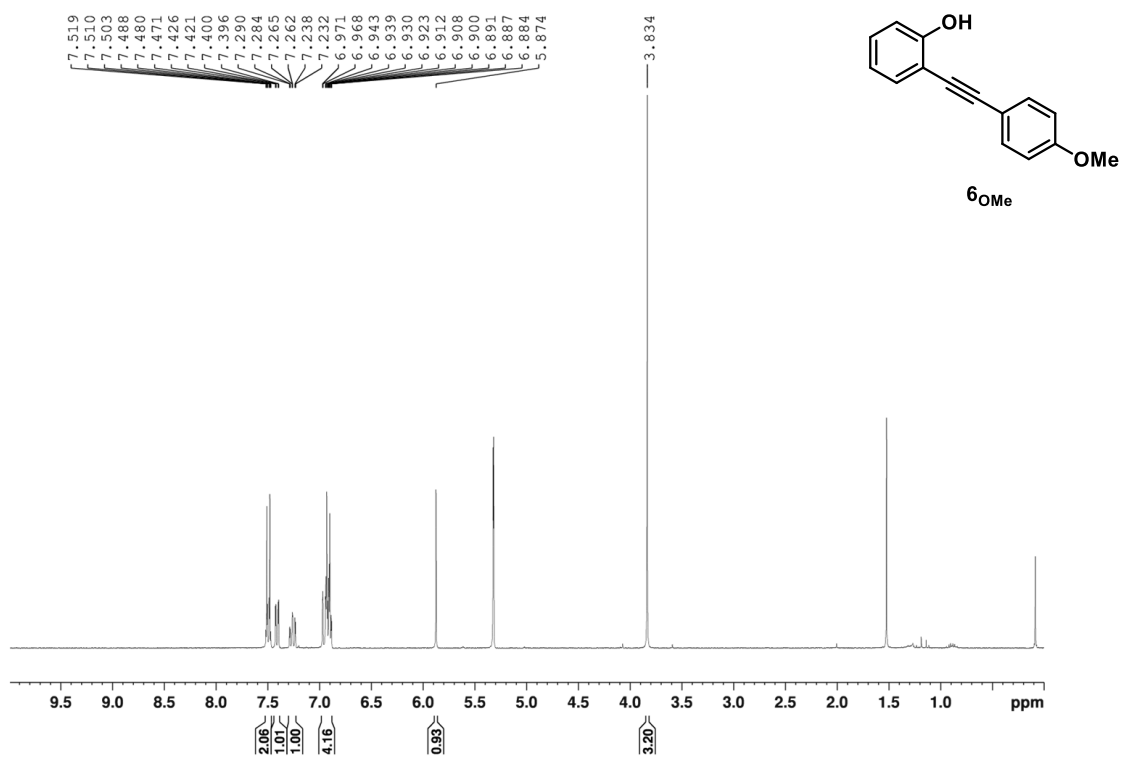Figure S 17: <sup>1</sup>H NMR (300.51 MHz, CD<sub>2</sub>Cl<sub>2</sub>) of **6<sub>OMe</sub>**.

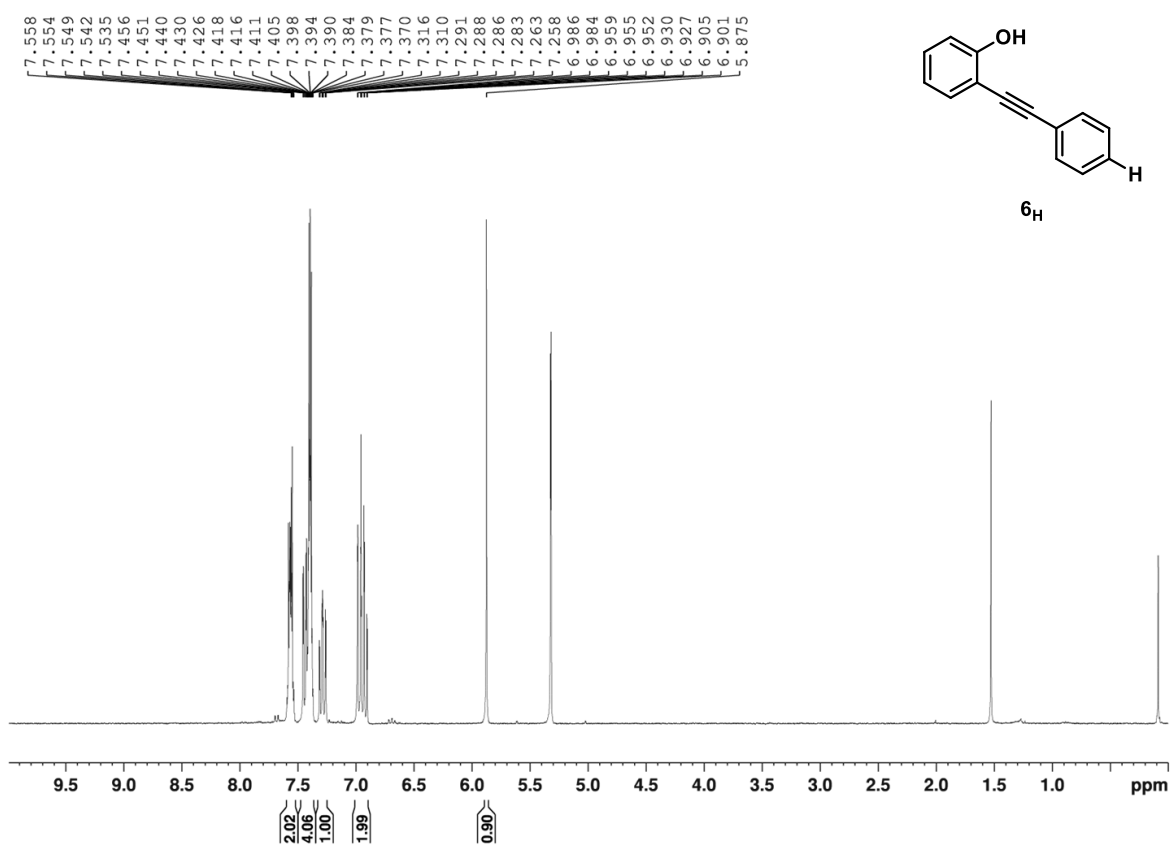

**Figure S 18:**  $^1\text{H}$  NMR (300.51 MHz,  $\text{CD}_2\text{Cl}_2$ ) of **6<sub>H</sub>**.

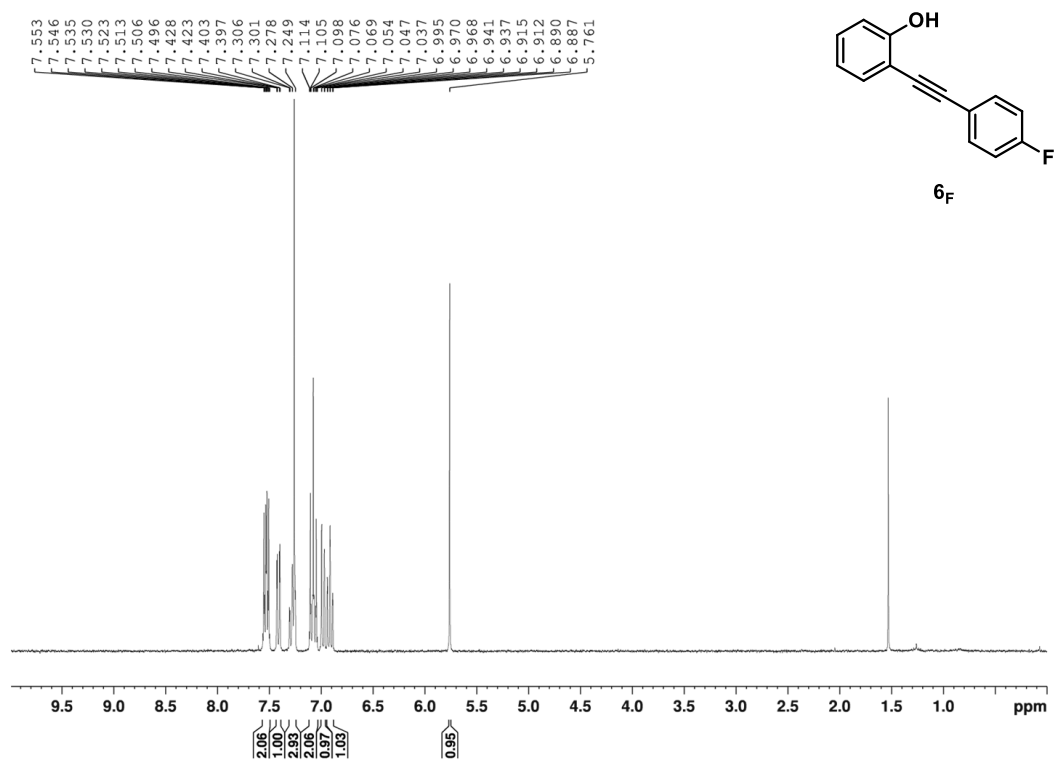

**Figure S 19:**  $^1\text{H}$  NMR (300.51 MHz,  $\text{CDCl}_3$ ) of **6<sub>F</sub>**.



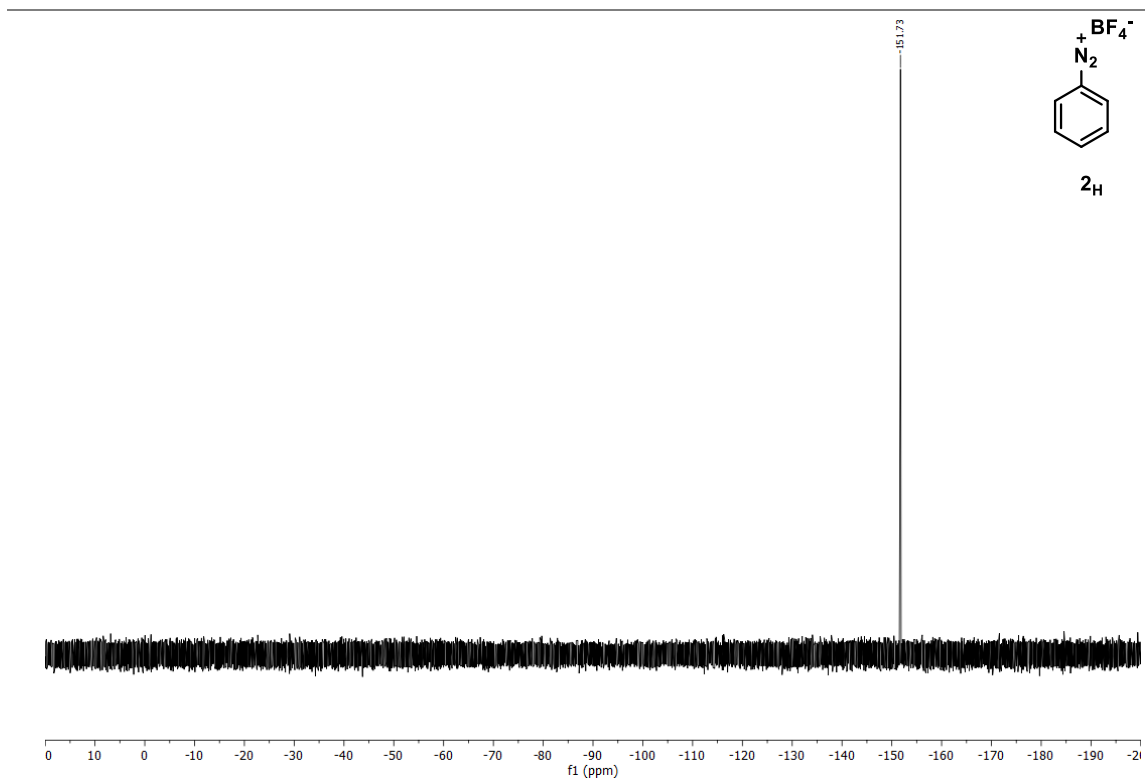Figure S 22:  $^{19}\text{F}$  NMR (282.21 MHz,  $\text{CD}_3\text{CN}$ ) of **2<sub>H</sub>**.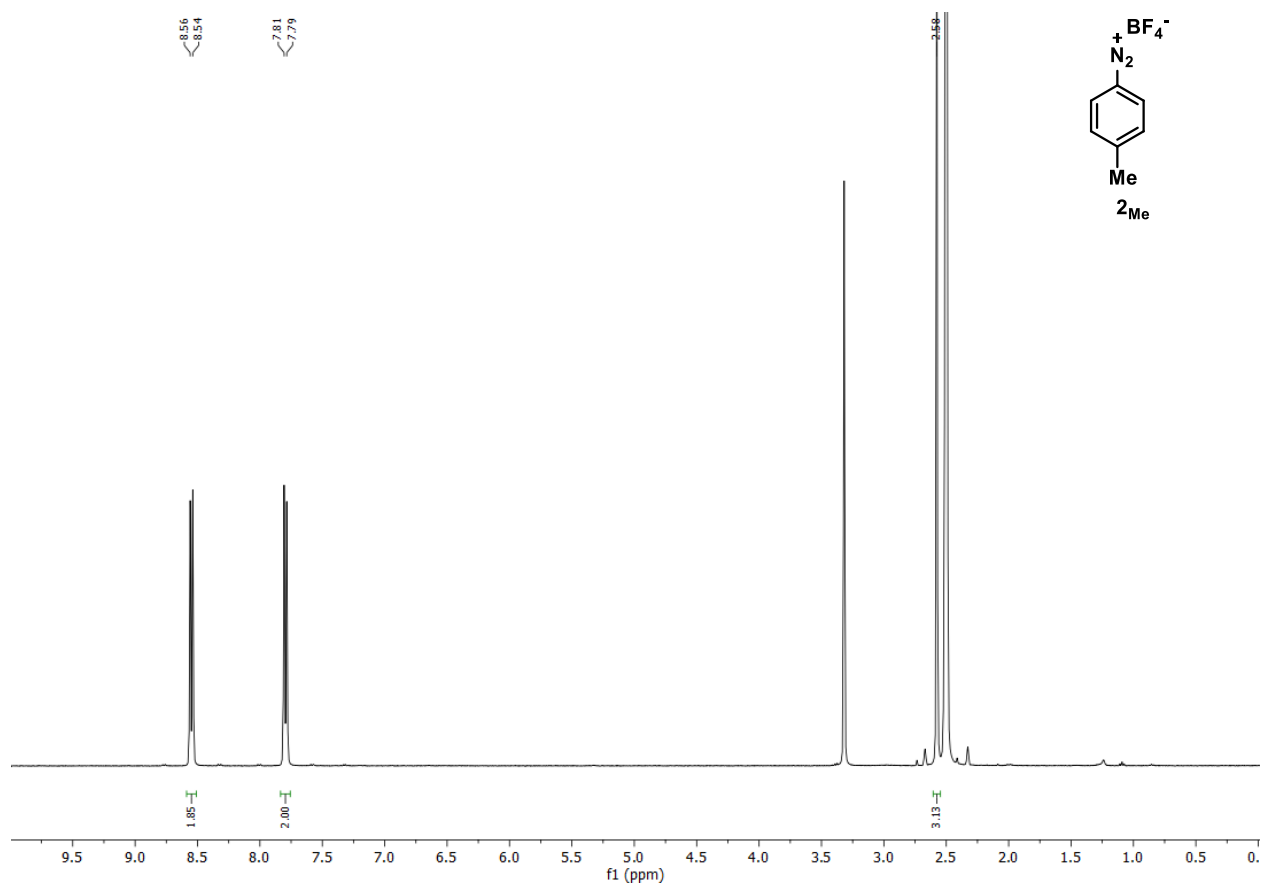Figure S 23:  $^1\text{H}$  NMR (399.82 MHz,  $\text{DMSO-d}_6$ ) of **2<sub>Me</sub>**.

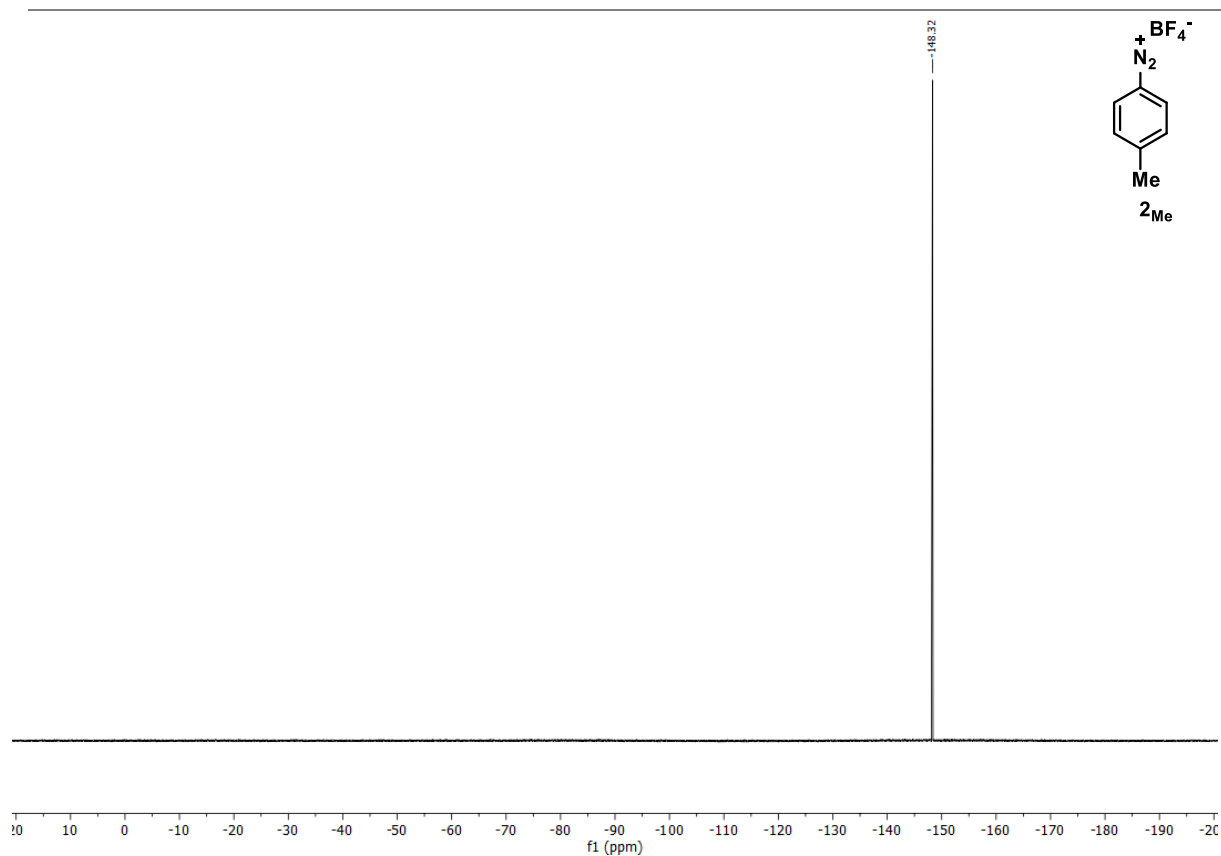Figure S 24:  $^{19}\text{F}$  NMR (376.17 MHz,  $\text{DMSO-d}_6$ ) of **2Me**.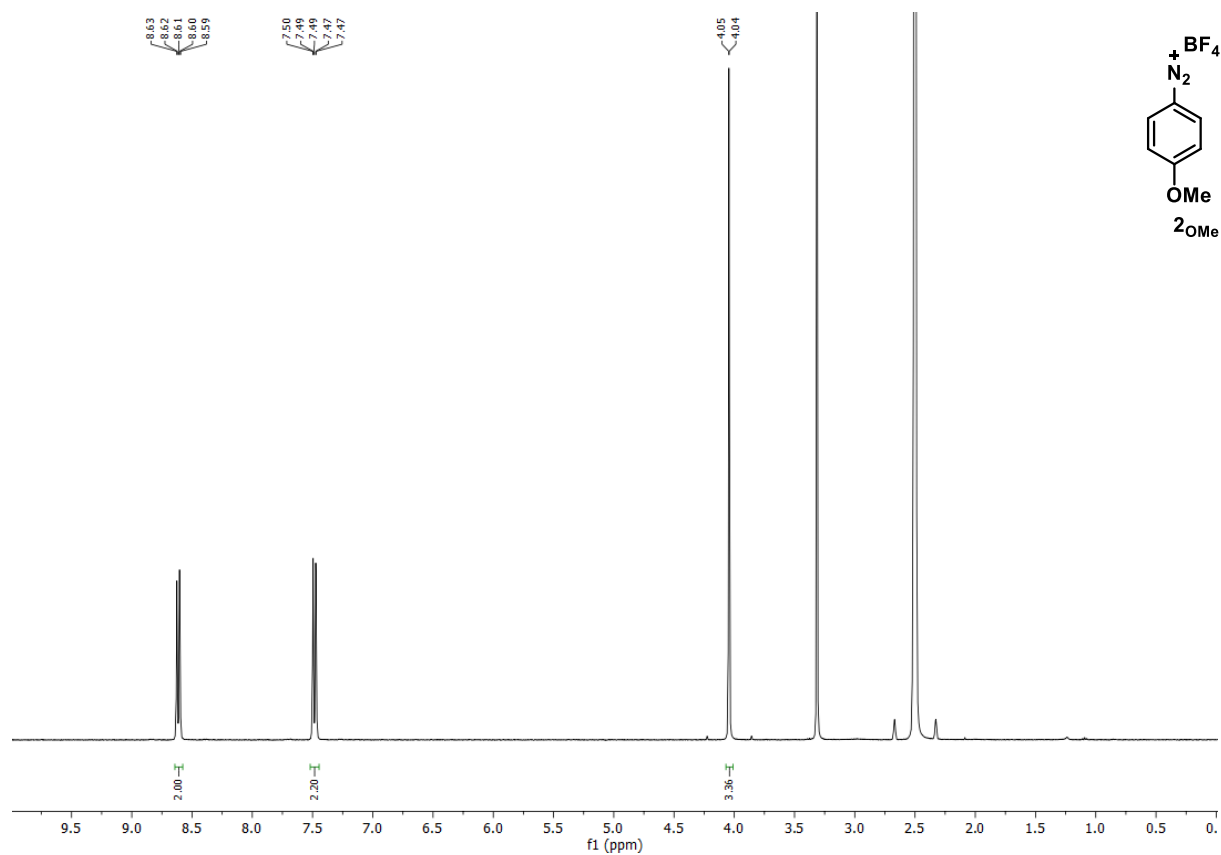Figure S 25:  $^1\text{H}$  NMR (399.82 MHz,  $\text{DMSO-d}_6$ ) of **2OMe**.

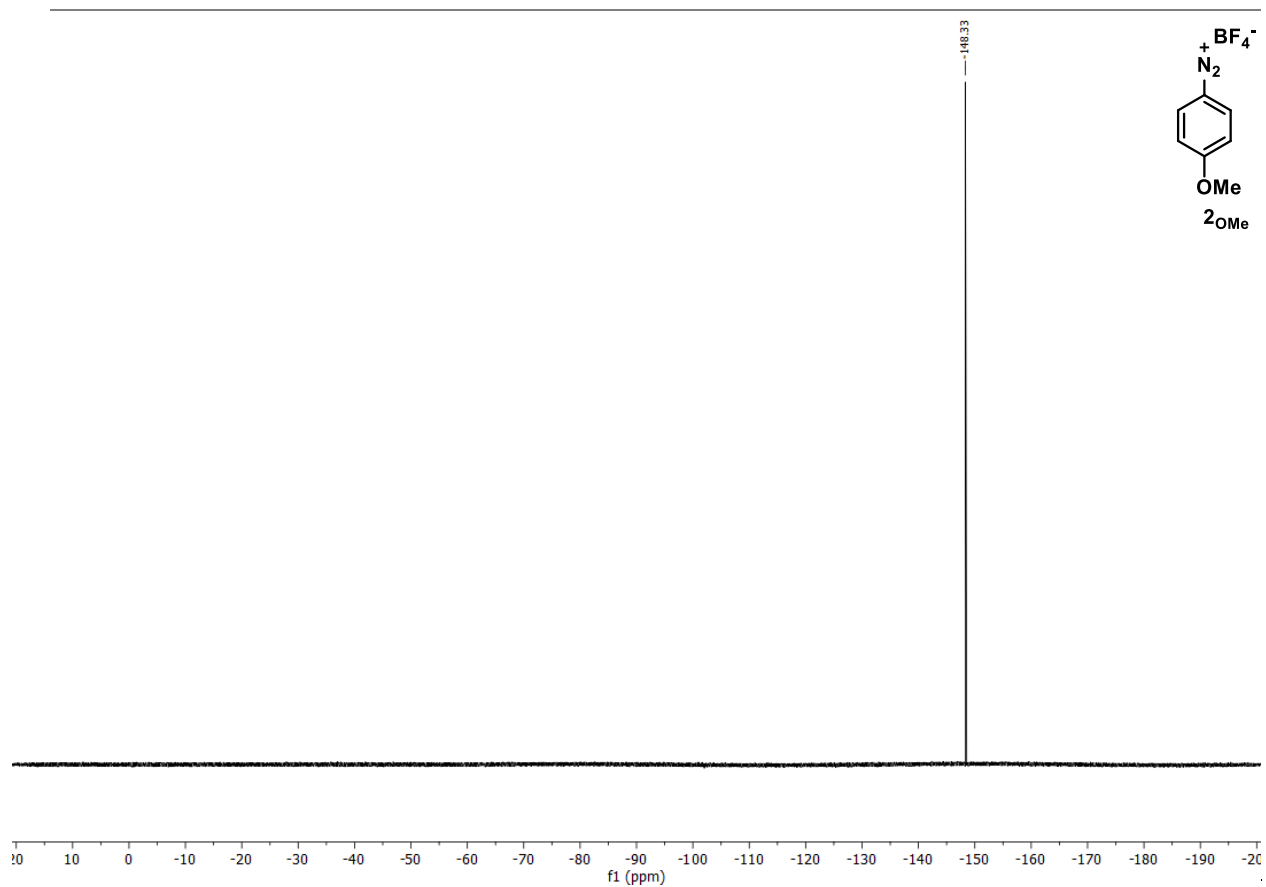Figure S 26:  $^{19}\text{F}$  NMR (376.17 MHz,  $\text{DMSO-d}_6$ ) of **2OMe**.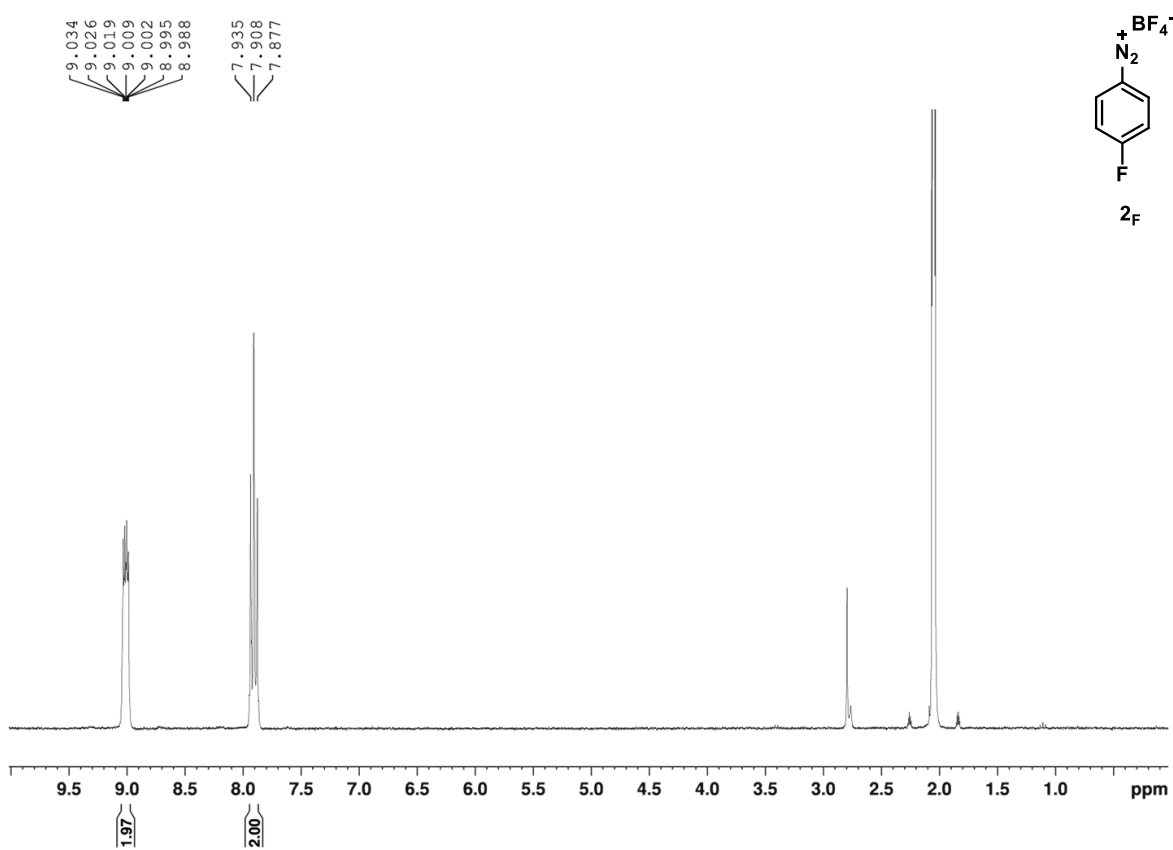Figure S 27:  $^1\text{H}$  NMR (300.51 MHz,  $(\text{CD}_3)_2\text{CO}$ ) of **2F**.

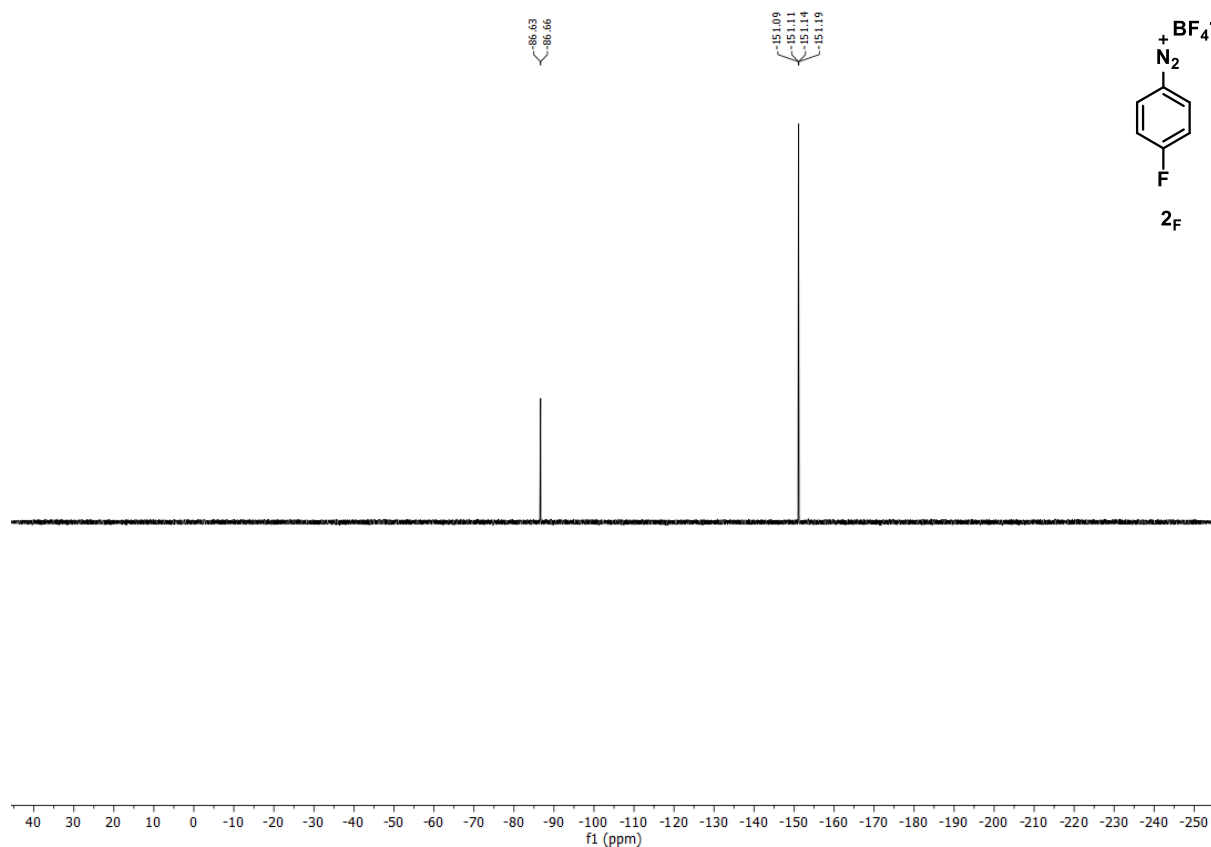Figure S 28:  $^{19}\text{F}$  NMR (282.76 MHz,  $(\text{CD}_3)_2\text{CO}$ ) of **2<sub>F</sub>**.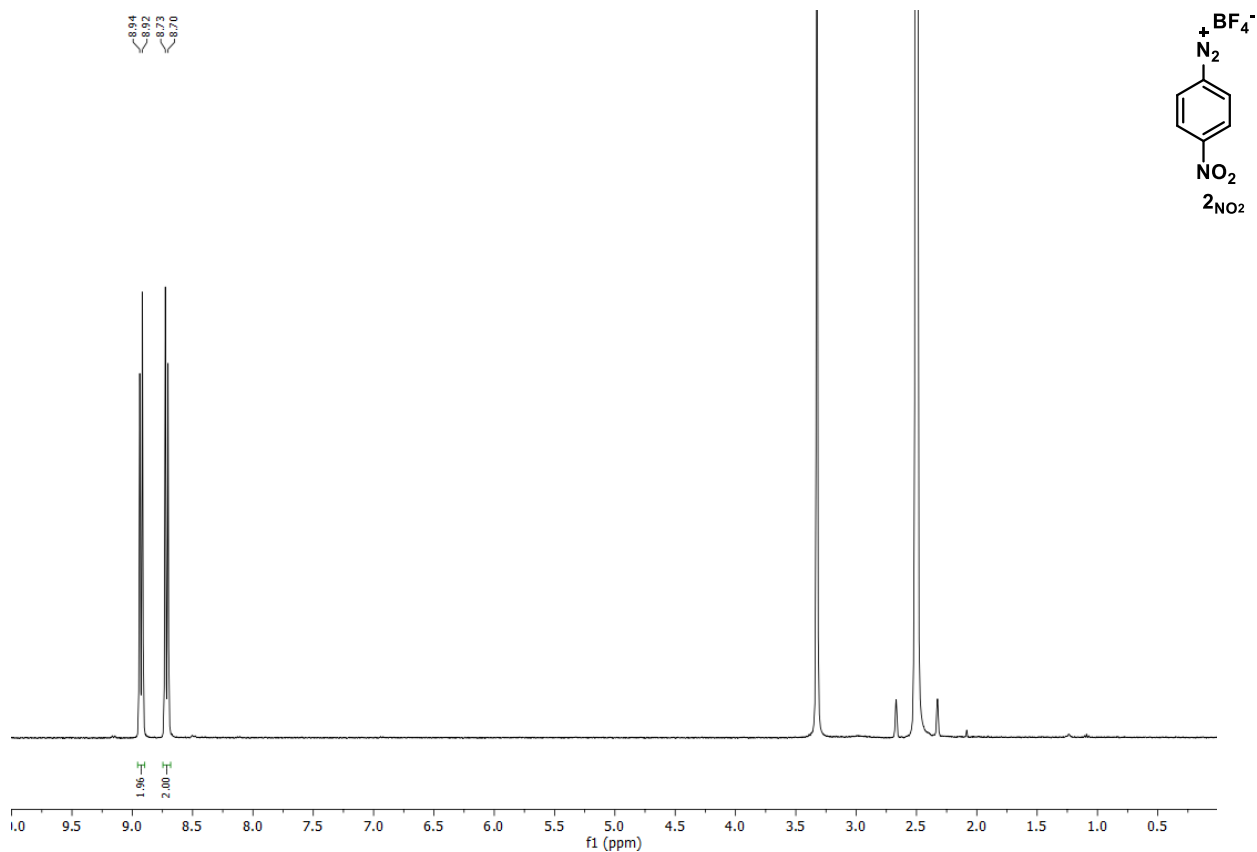Figure S 29:  $^1\text{H}$  NMR (399.82 MHz,  $\text{DMSO-d}_6$ ) of **2<sub>NO2</sub>**.

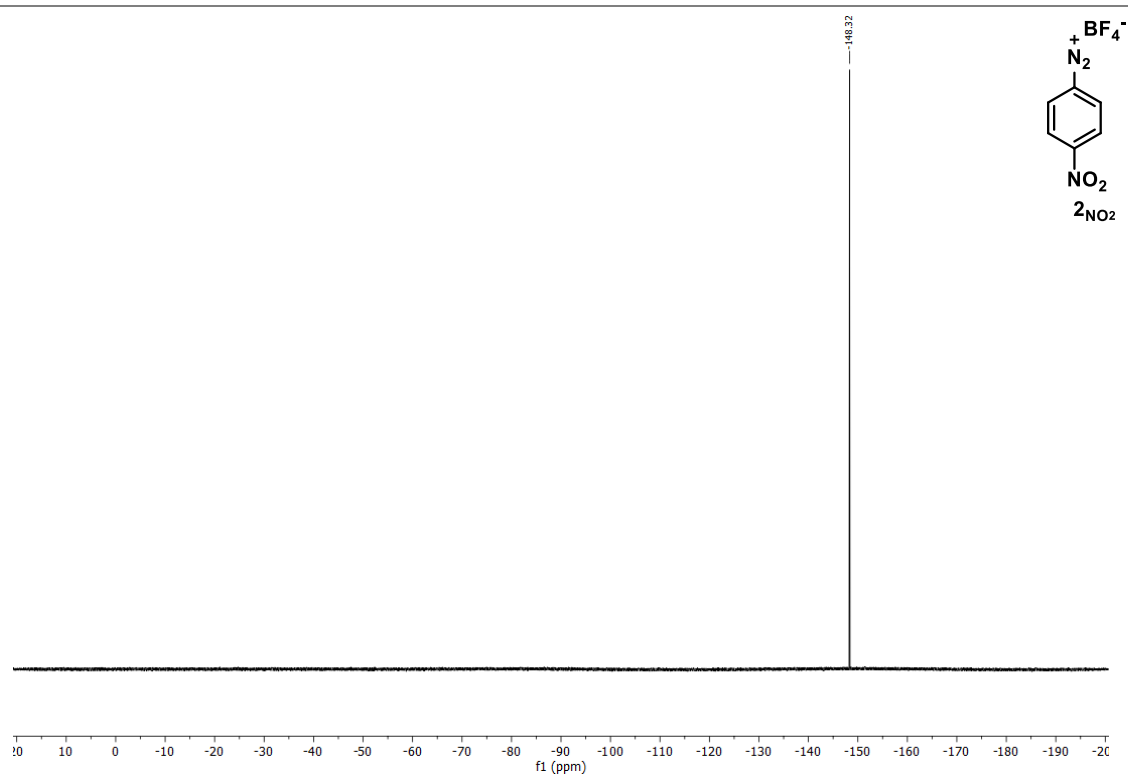Figure S 30:  $^{19}\text{F}$  NMR (376.17 MHz,  $\text{DMSO-d}_6$ ) of  $2\text{NO}_2$ .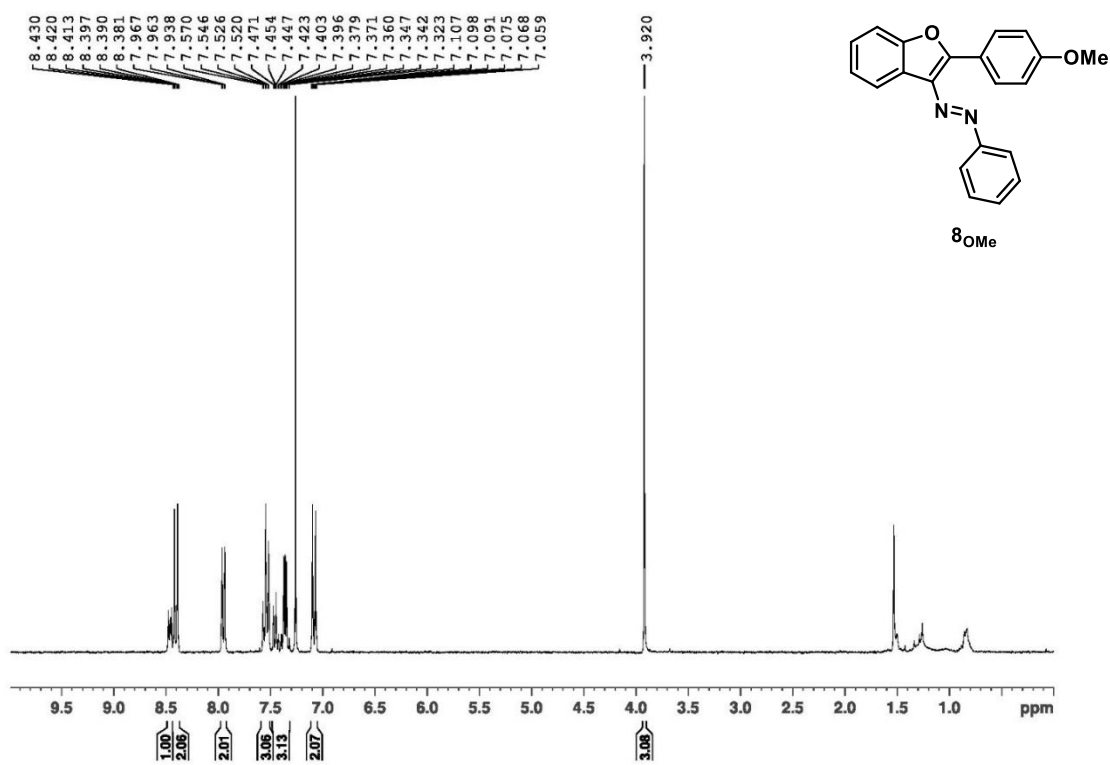Figure S 31:  $^1\text{H}$  NMR (300.51 MHz,  $\text{CDCl}_3$ ) of  $8\text{OMe}$ .



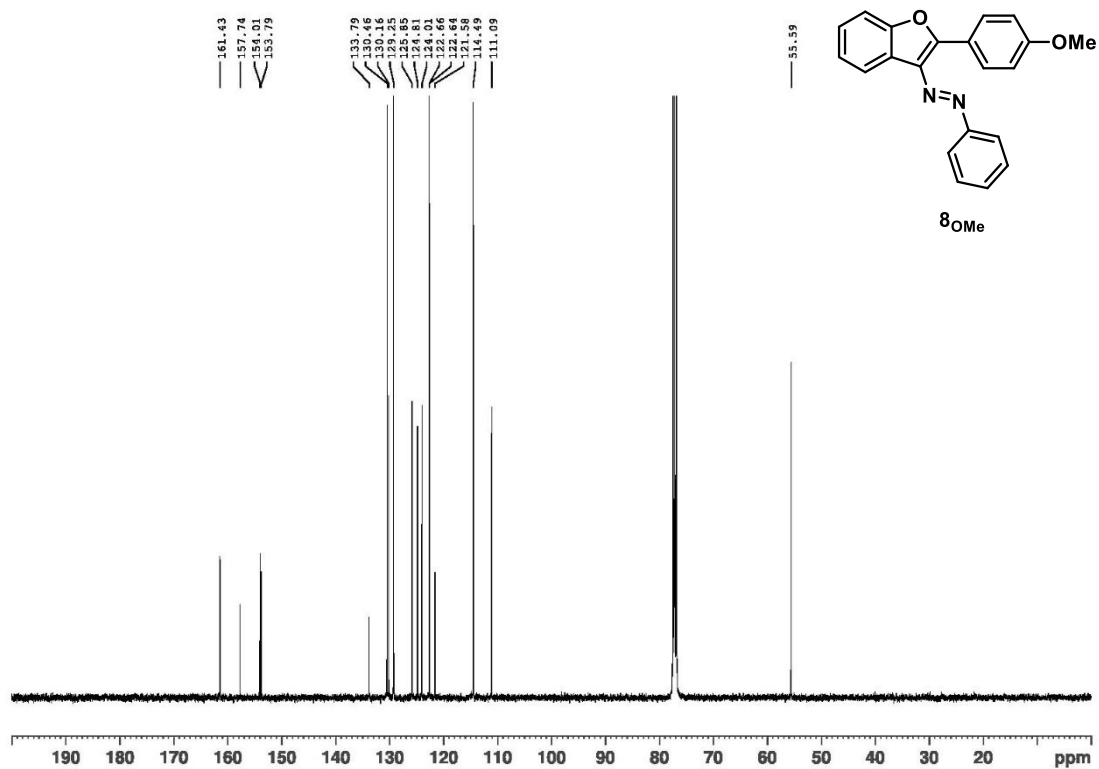Figure S 32: <sup>13</sup>C NMR (100.66 MHz, CDCl<sub>3</sub>) of **8**<sub>OMe</sub>.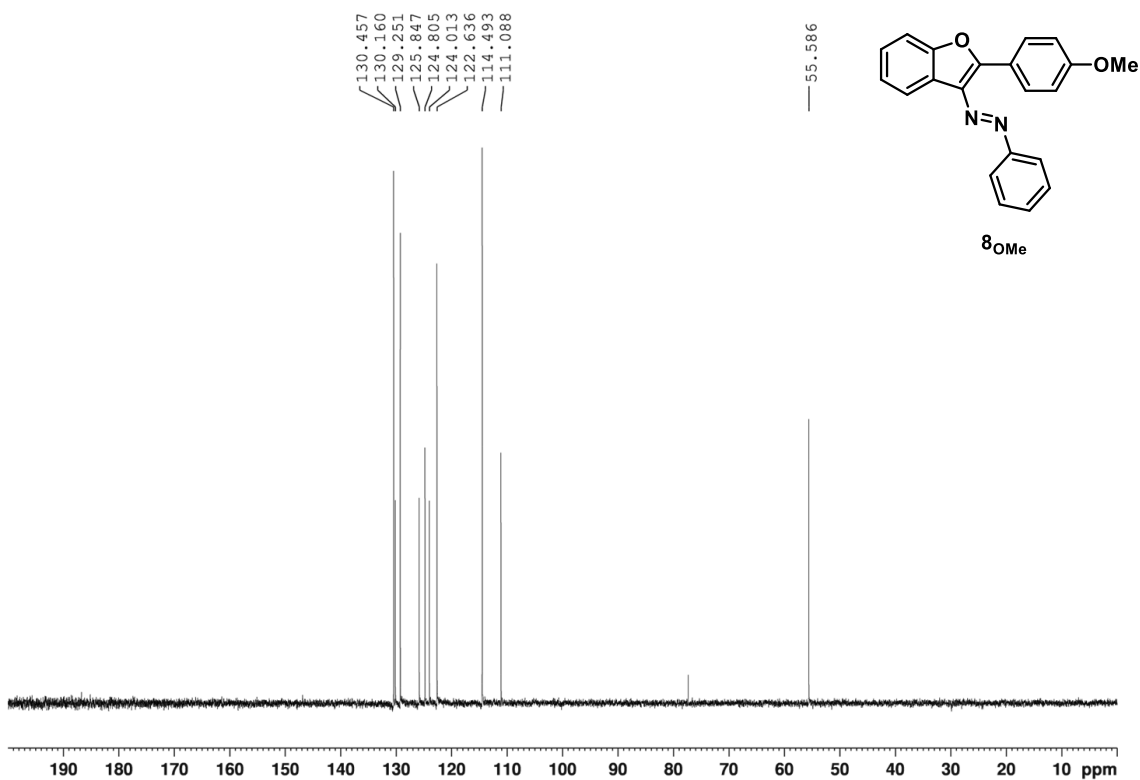Figure S 33: DEPT135 NMR (100.66 MHz, CDCl<sub>3</sub>) of **8**<sub>OMe</sub>.

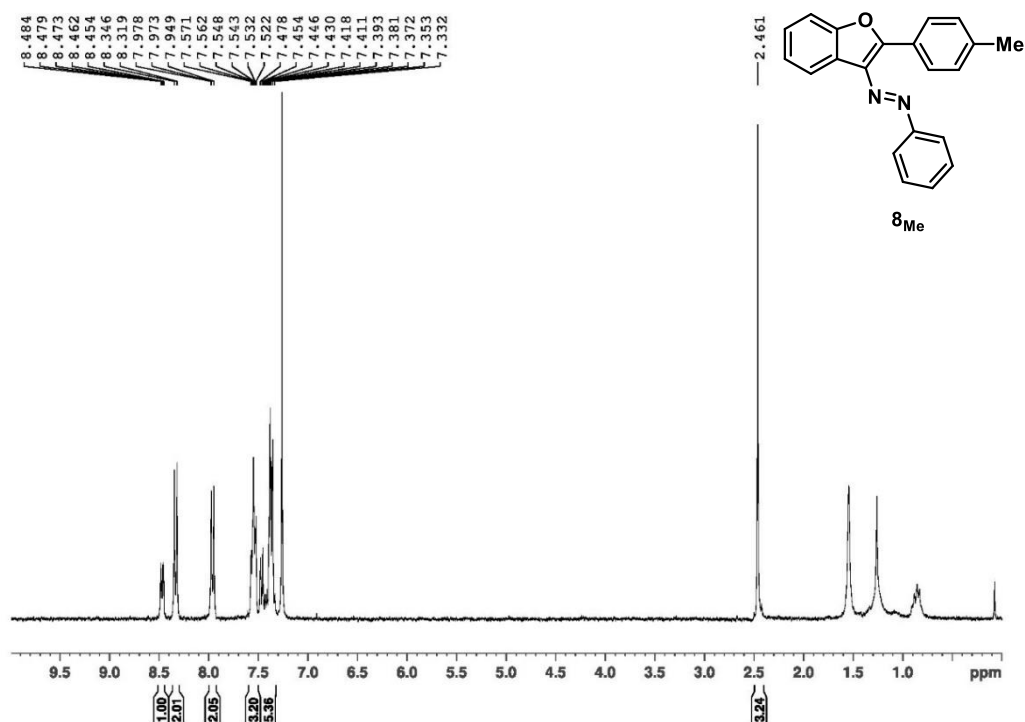Figure S 34: <sup>1</sup>H NMR (300.51 MHz, CDCl<sub>3</sub>) of **8<sub>Me</sub>**.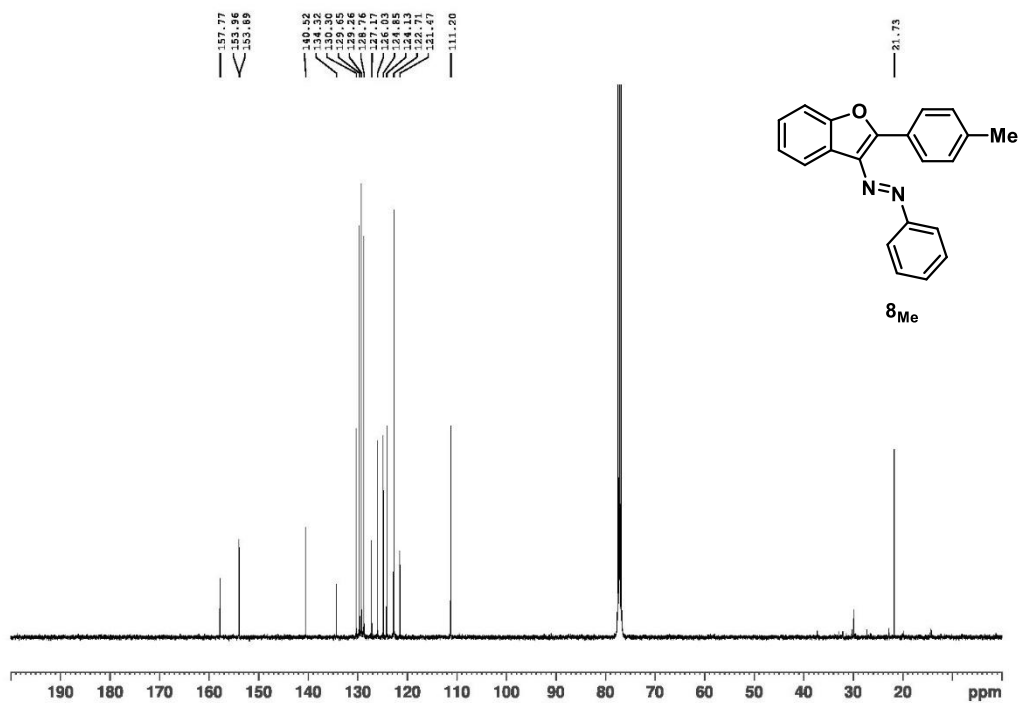Figure S 35: <sup>13</sup>C NMR (100.66 MHz, CDCl<sub>3</sub>) of **8<sub>Me</sub>**.

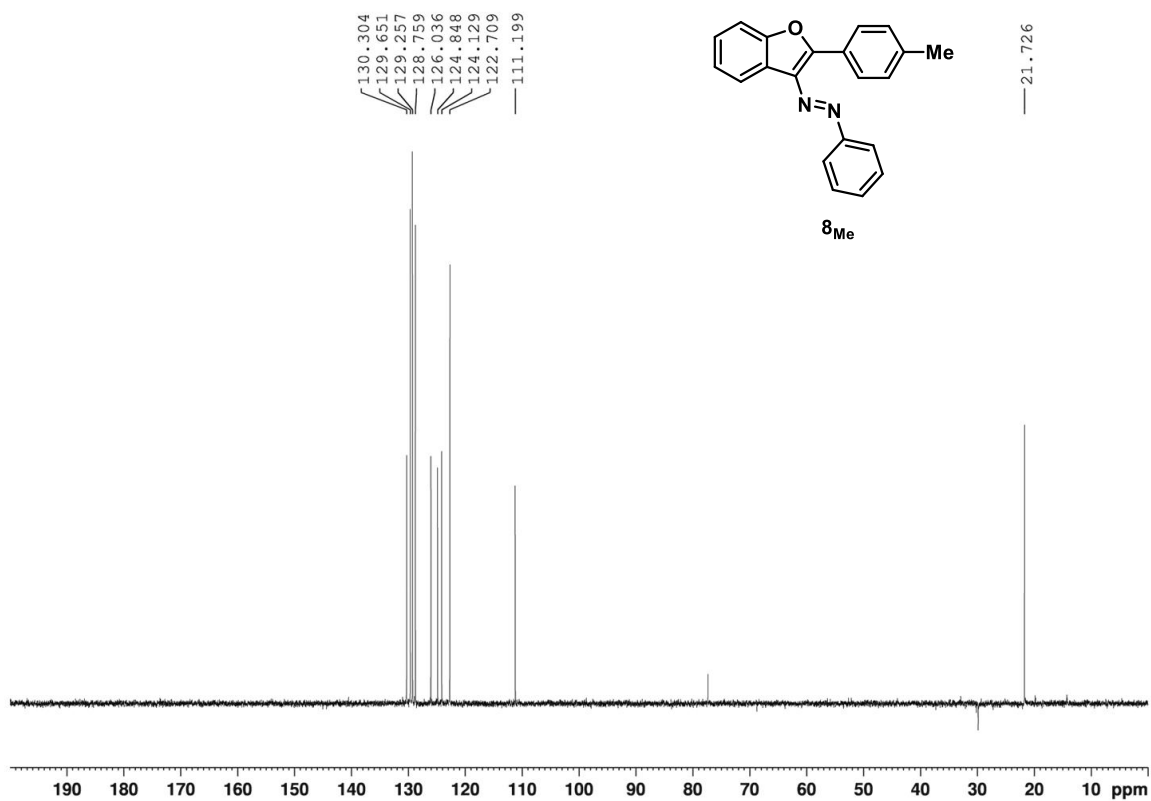Figure S 36: DEPT135 NMR (100.66 MHz, CDCl<sub>3</sub>) of **8<sub>Me</sub>**.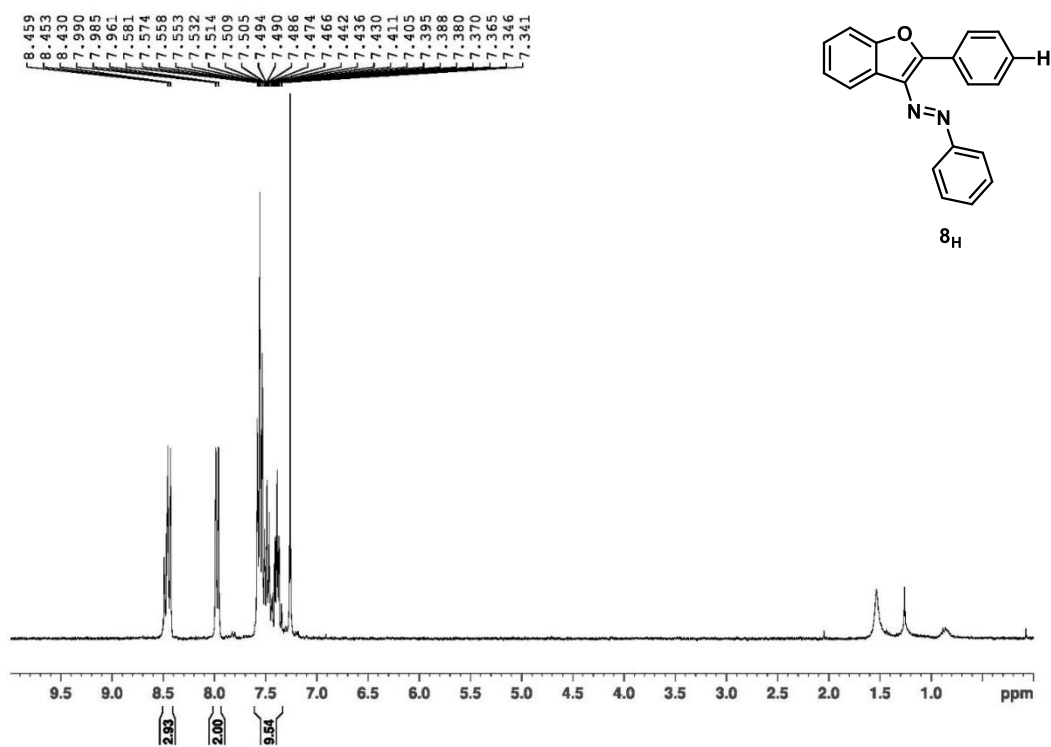Figure S 37: <sup>1</sup>H NMR (300.51 MHz, CDCl<sub>3</sub>) of **8<sub>H</sub>**.

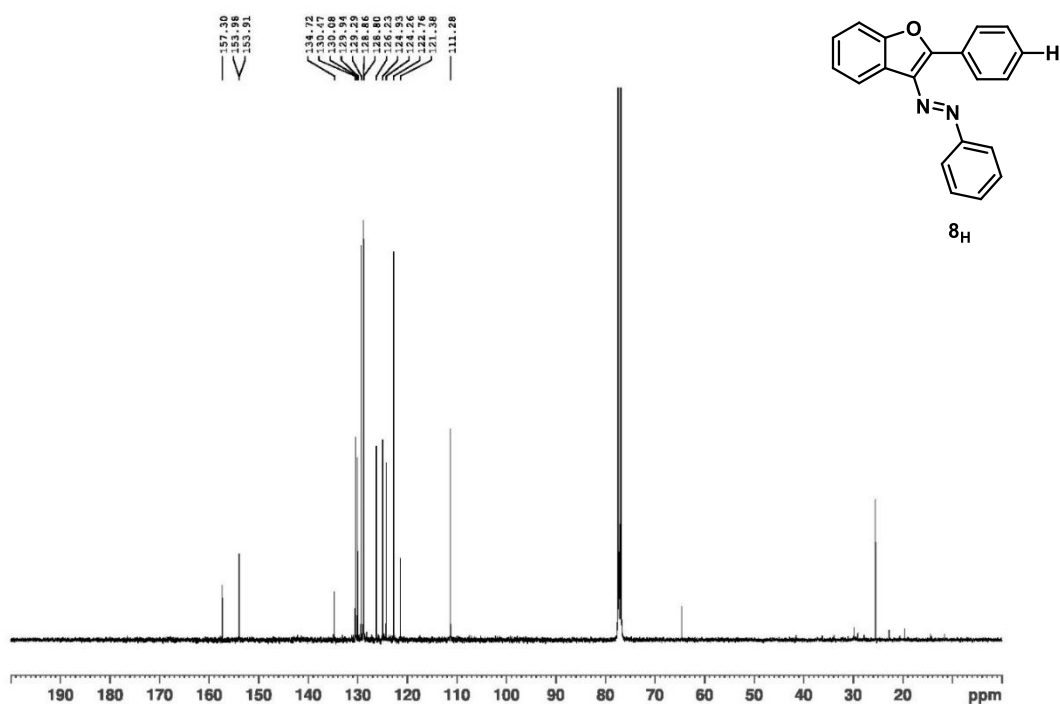Figure S 38: <sup>13</sup>C NMR (100.66 MHz, CDCl<sub>3</sub>) of **8<sub>H</sub>**.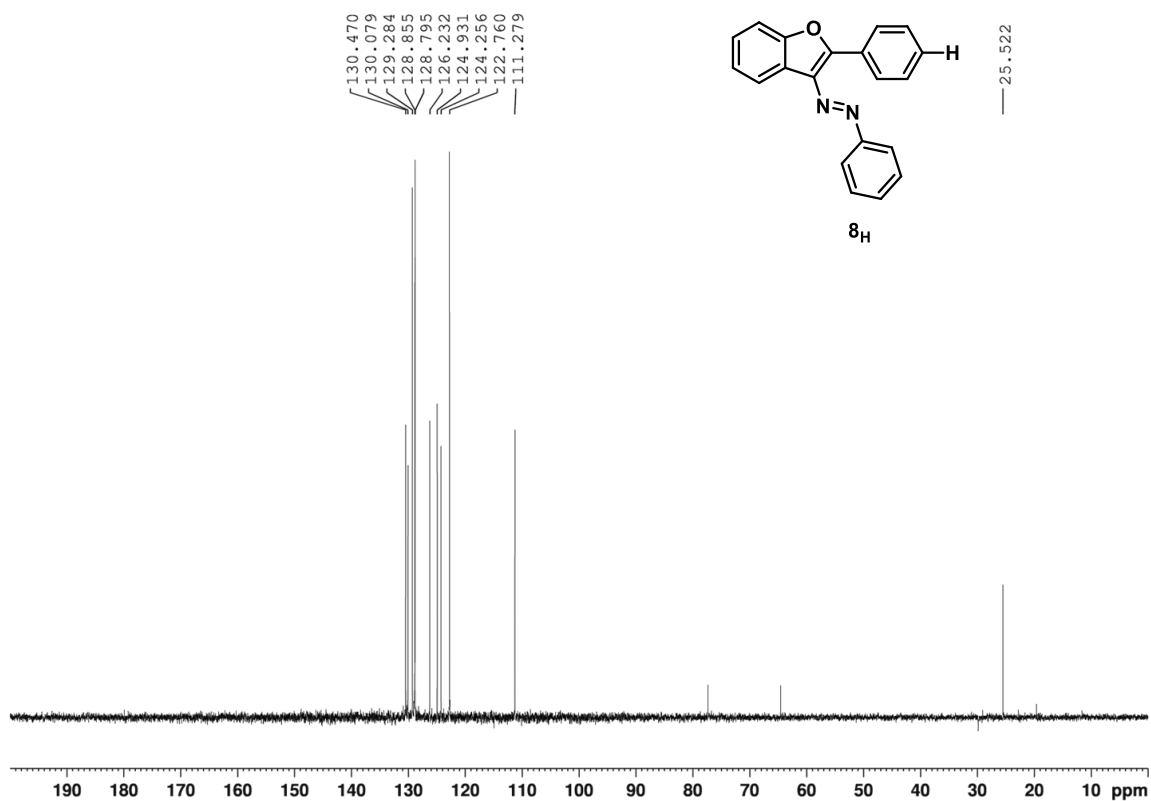Figure S 39: DEPT135 NMR (100.66 MHz, CDCl<sub>3</sub>) of **8<sub>H</sub>**.

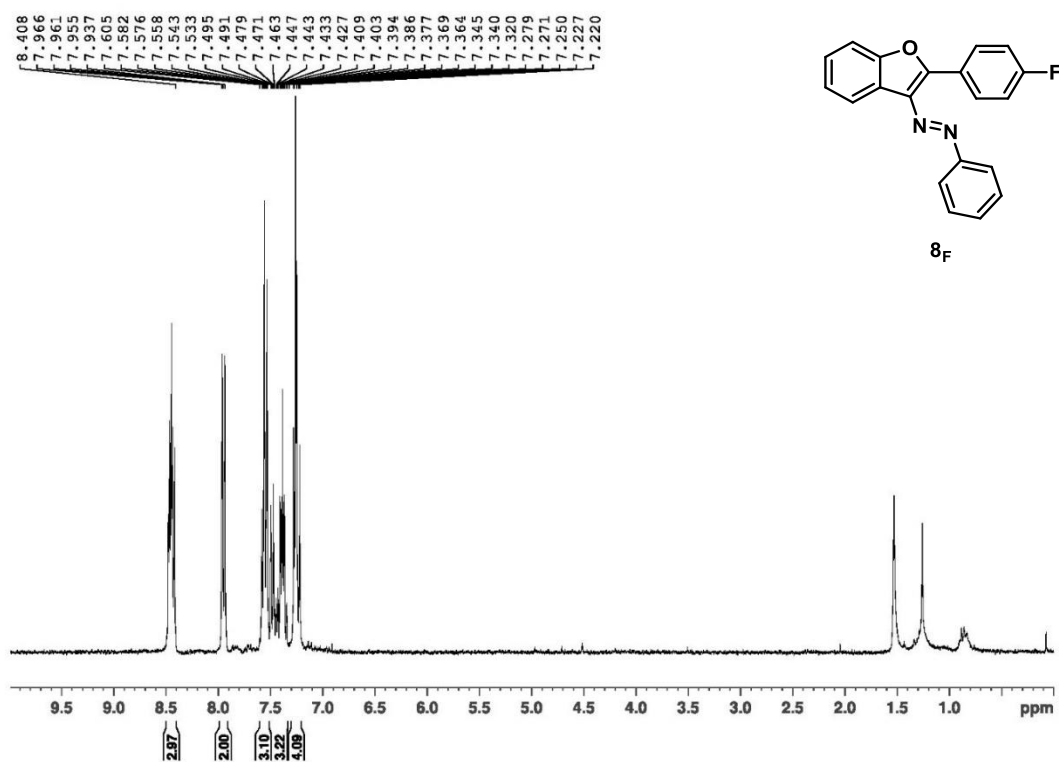Figure S 40: <sup>1</sup>H NMR (300.51 MHz, CDCl<sub>3</sub>) of **8<sub>F</sub>**.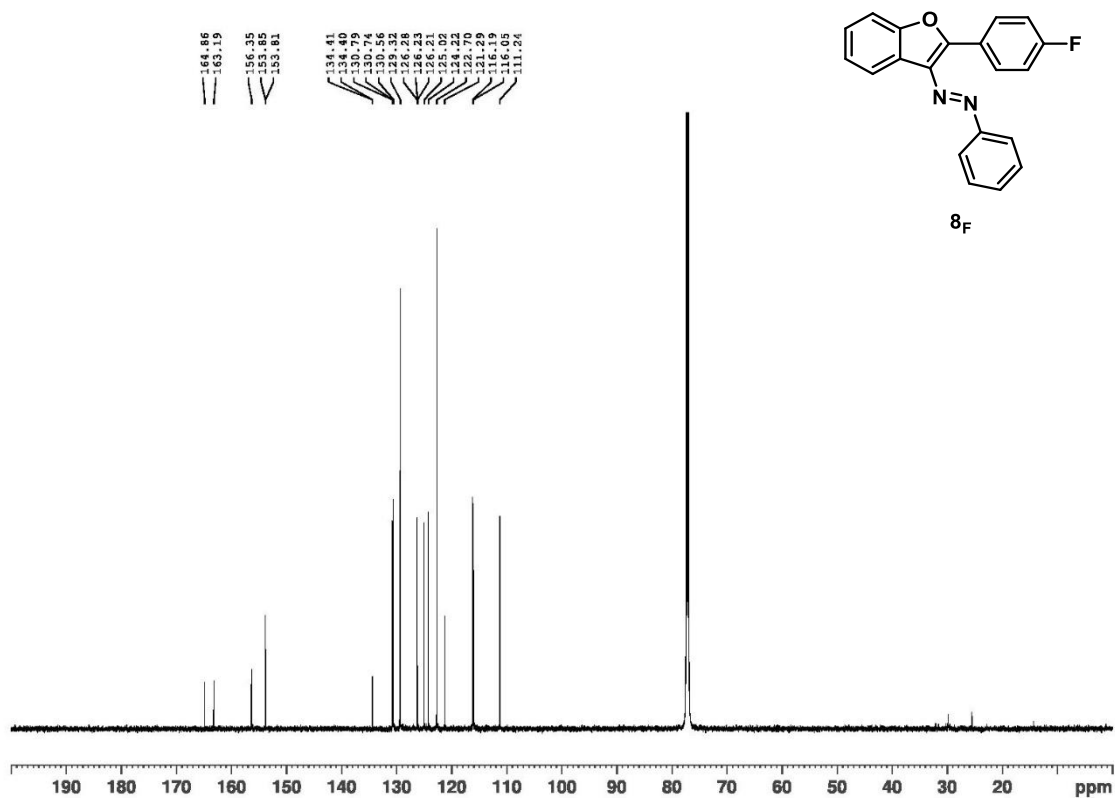Figure S 41: <sup>13</sup>C NMR (150.93 MHz, CDCl<sub>3</sub>) of **8<sub>F</sub>**.

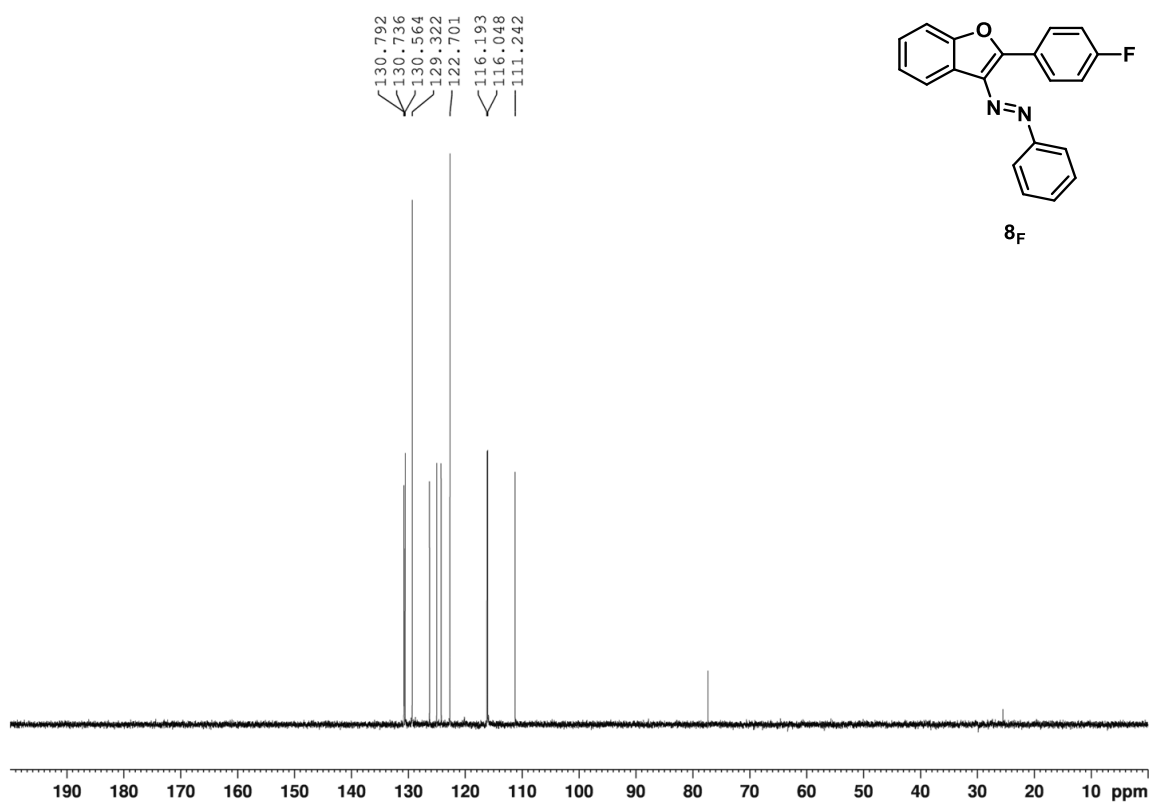

Figure S 42: DEPT135 NMR (150.93 MHz, CDCl<sub>3</sub>) of **8F**.

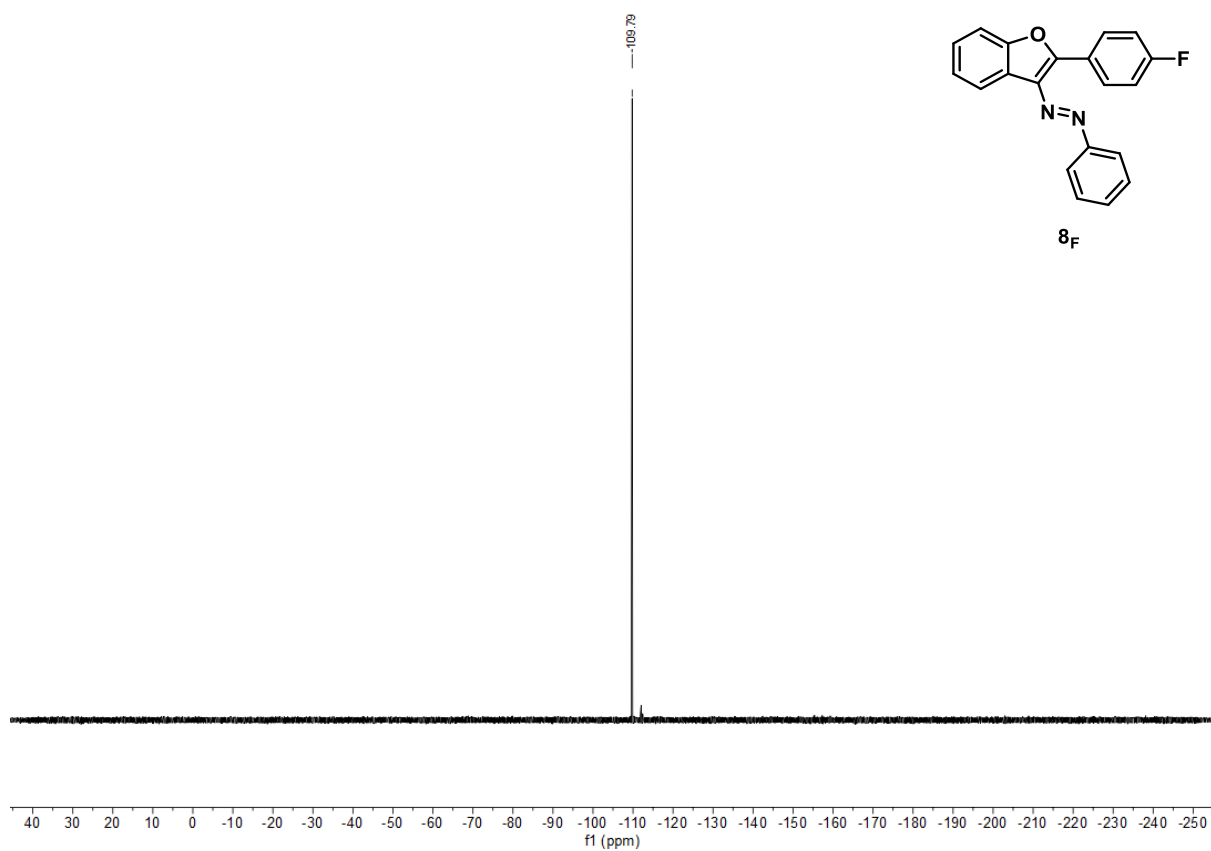

Figure S 43: <sup>19</sup>F NMR (282.76 MHz, CDCl<sub>3</sub>) of **8F**.

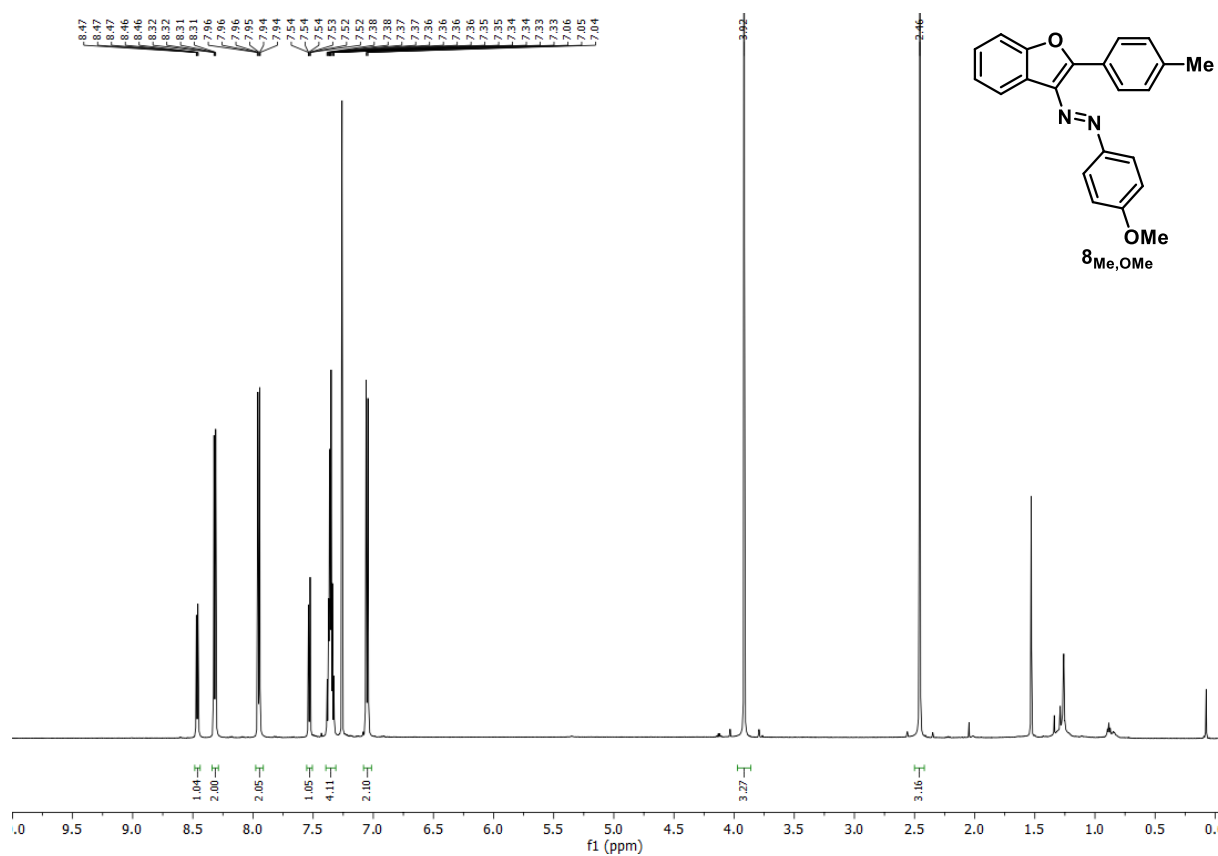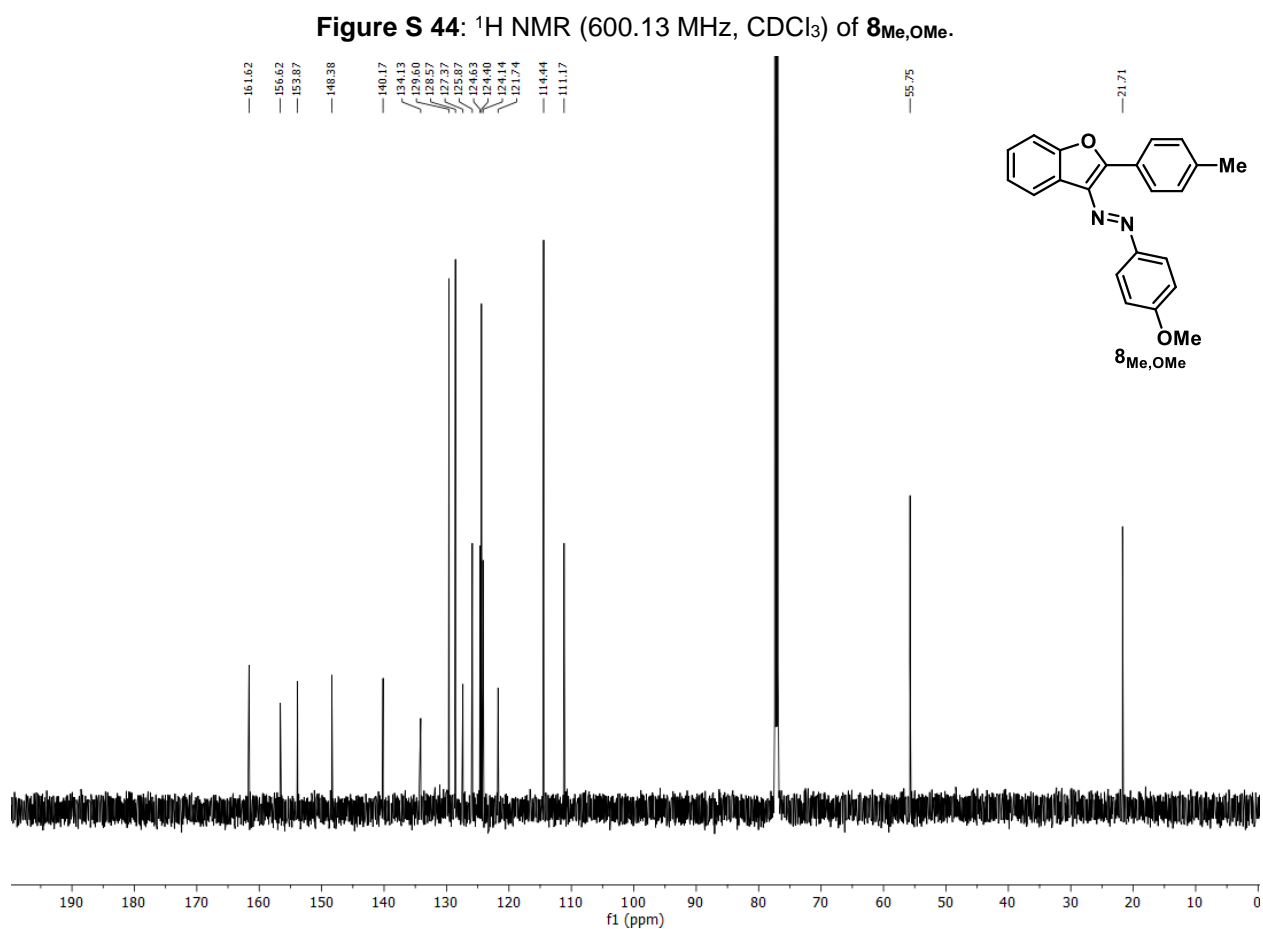

**Figure S 45: <sup>13</sup>C NMR (150.91 MHz, CDCl<sub>3</sub>) of **8<sub>Me,OMe</sub>**.**

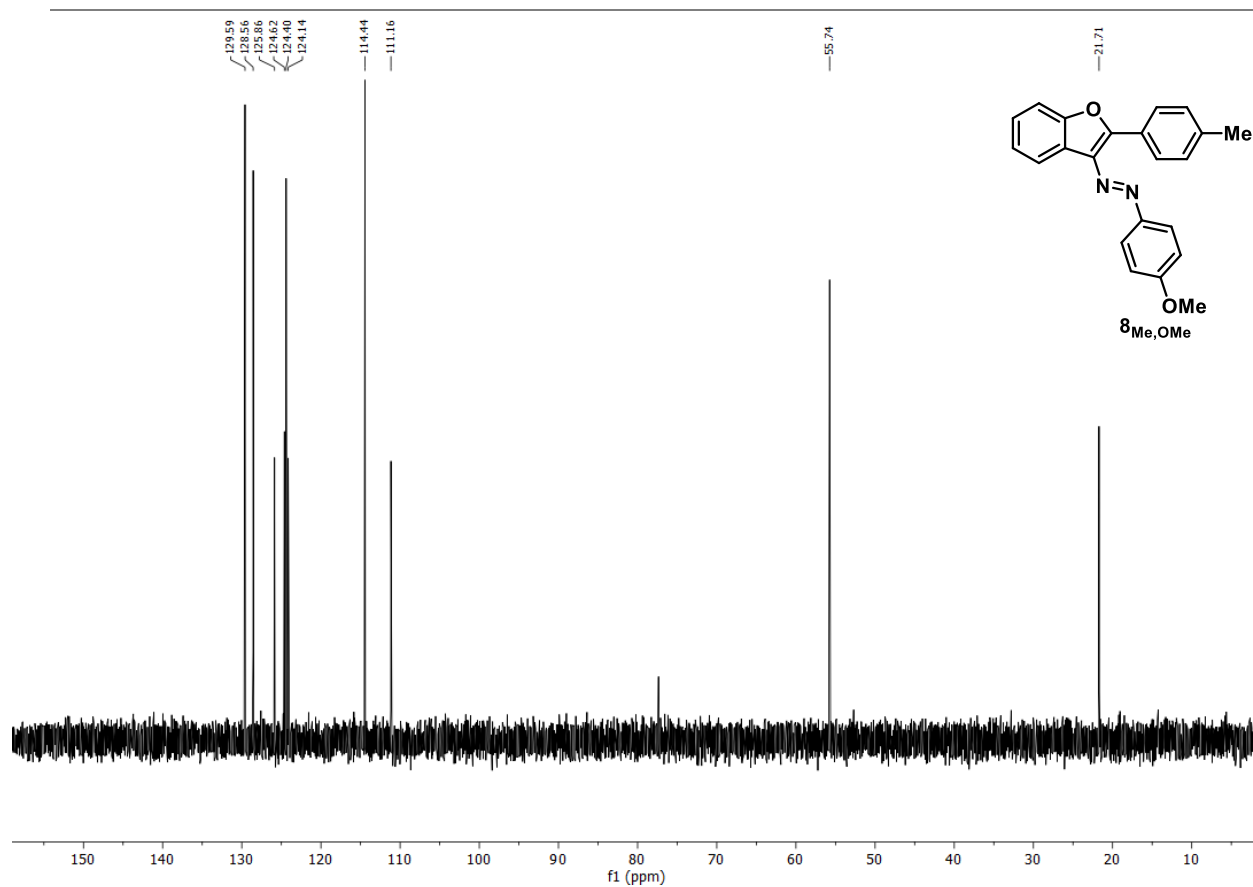Figure S 46: DEPT135 NMR (150.92 MHz, CDCl<sub>3</sub>) of **8<sub>Me,OMe</sub>**.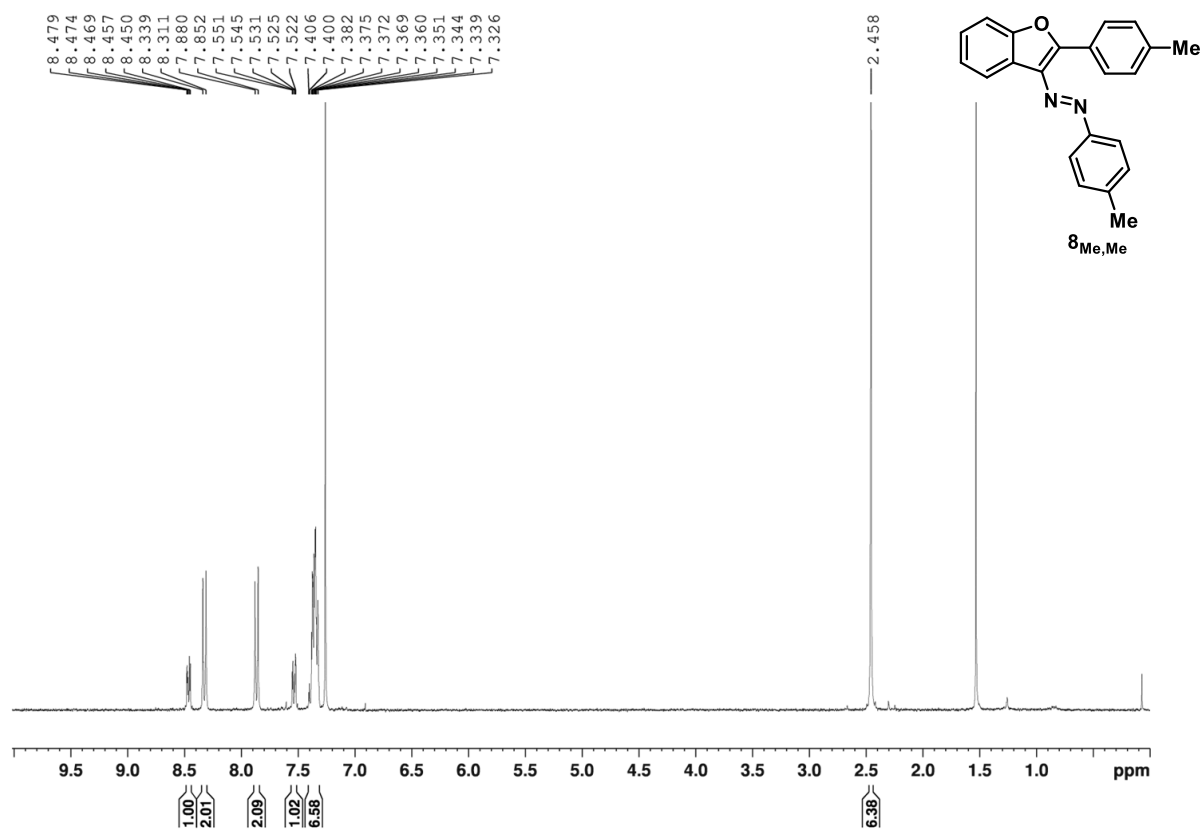Figure S 47: <sup>1</sup>H NMR (300.51 MHz, CDCl<sub>3</sub>) of **8<sub>Me,Me</sub>**.



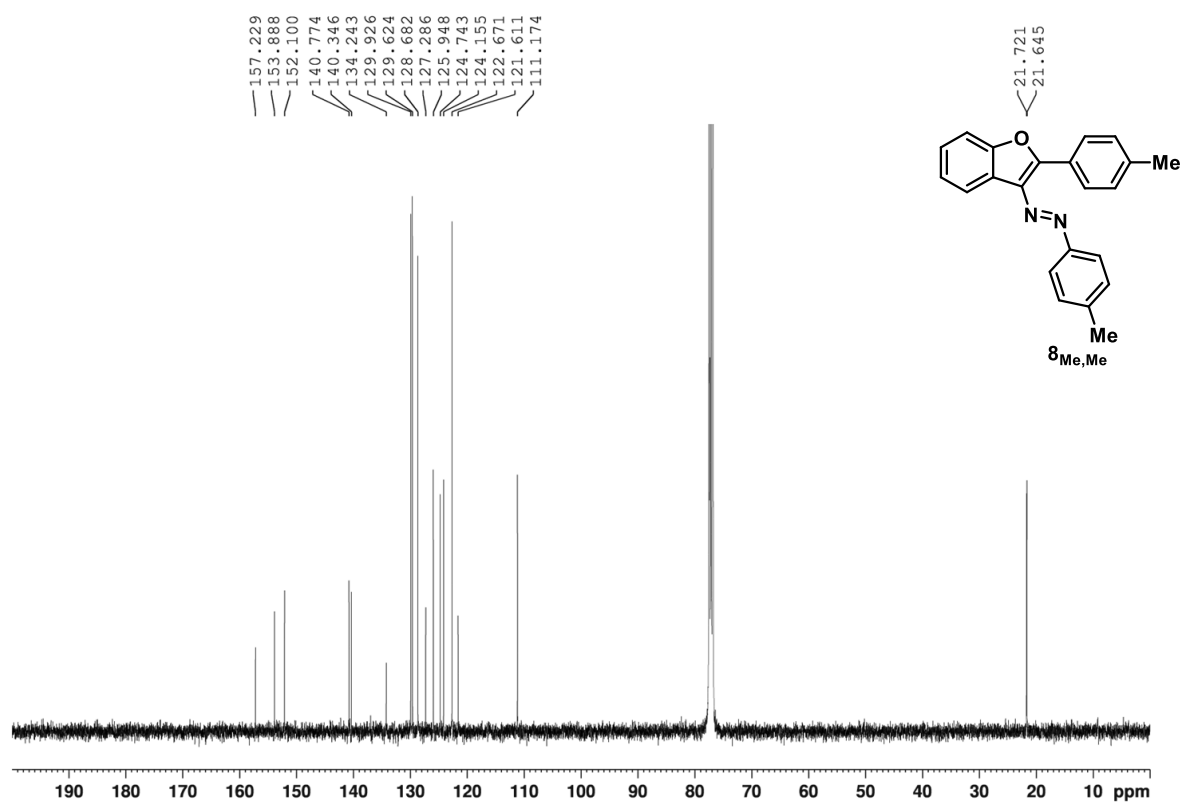Figure S 48: <sup>13</sup>C NMR (100.66 MHz, CDCl<sub>3</sub>) of **8<sub>Me,Me</sub>**.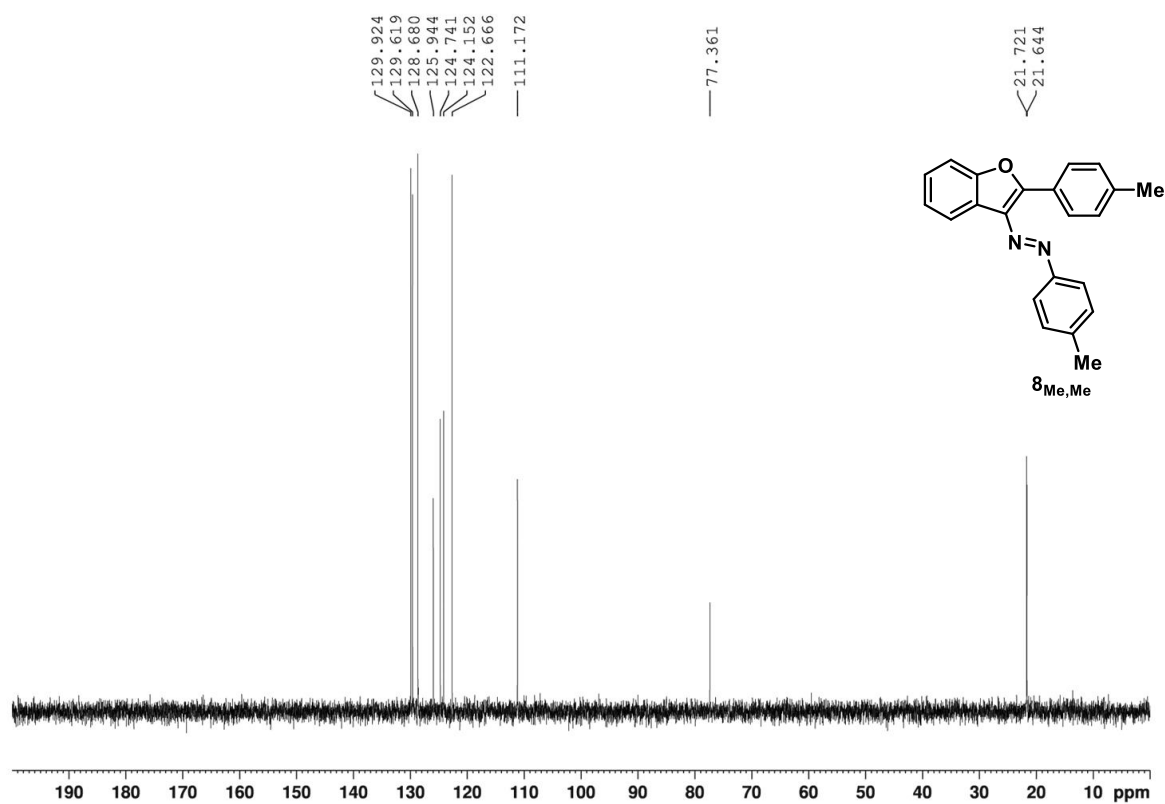Figure S 49: DEPT135 NMR (100.66 MHz, CDCl<sub>3</sub>) of **8<sub>Me,Me</sub>**.

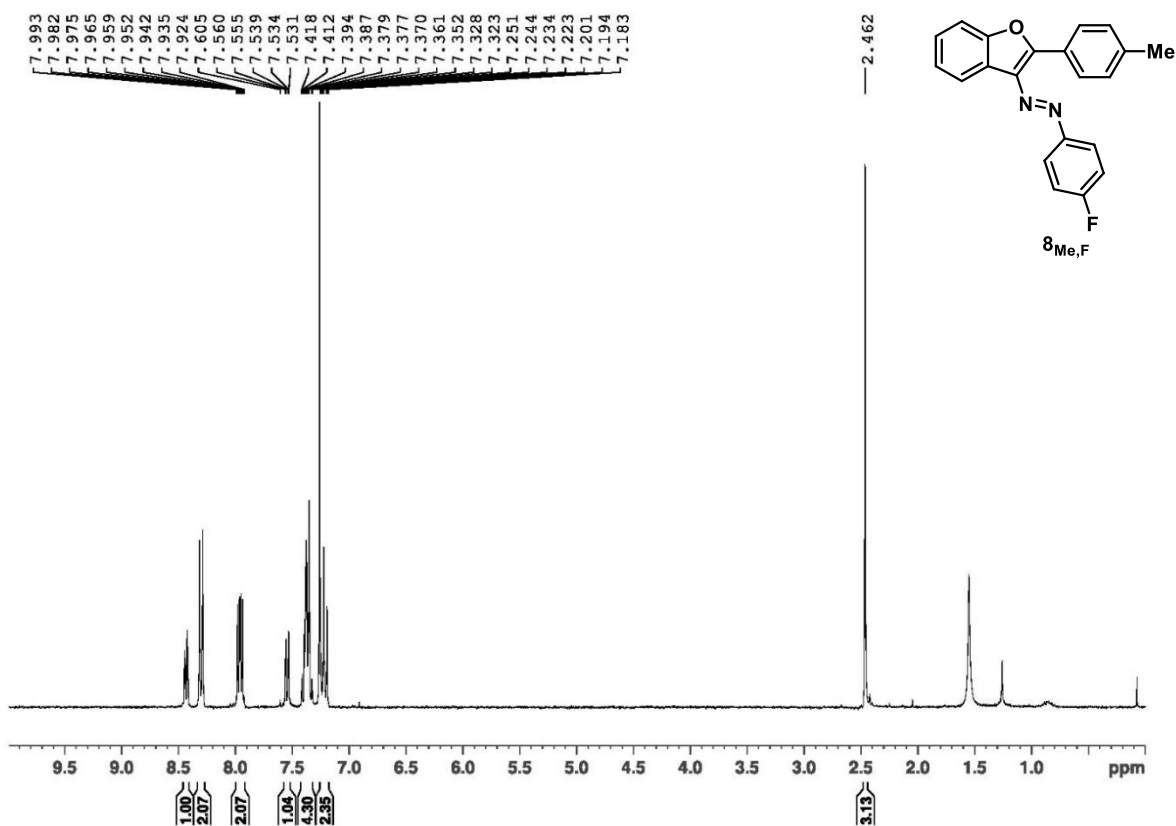Figure S 50: <sup>1</sup>H NMR (300.51 MHz, CDCl<sub>3</sub>) of **8<sub>Me,F</sub>**.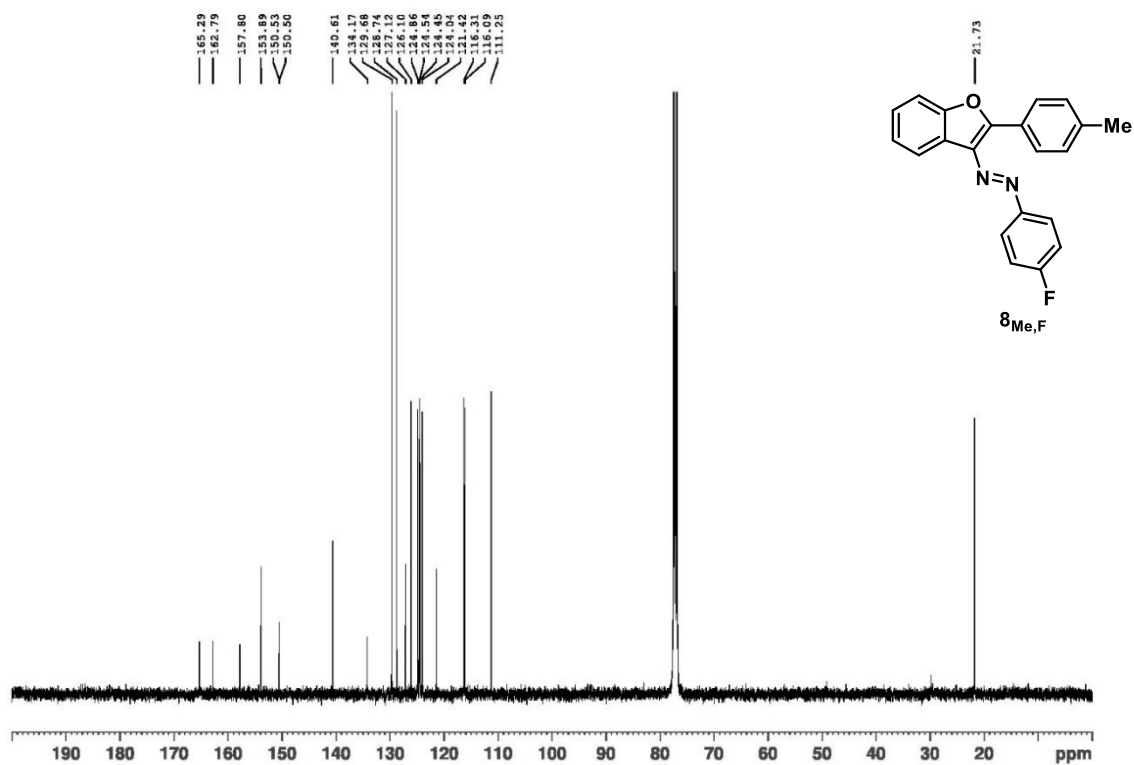Figure S 51: <sup>13</sup>C NMR (100.66 MHz, CDCl<sub>3</sub>) of **8<sub>Me,F</sub>**.

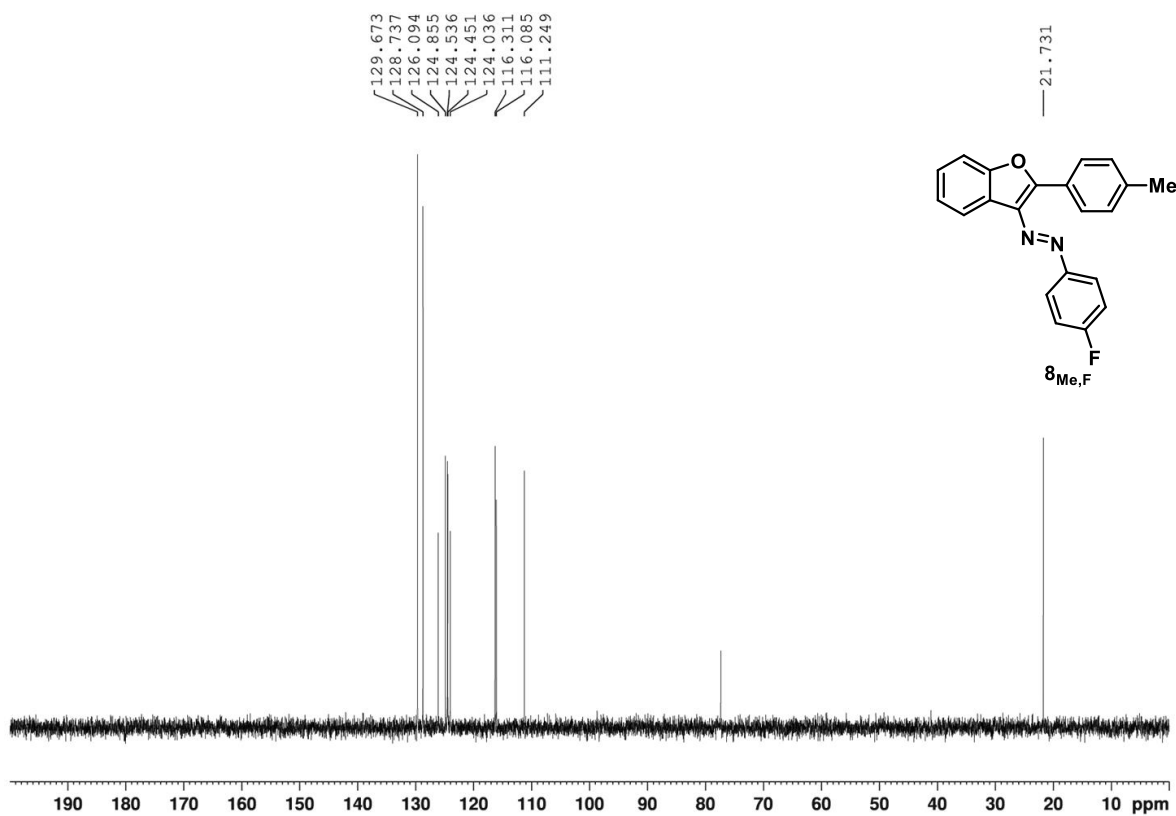

Figure S 52: DEPT135 (100.66 MHz, CDCl<sub>3</sub>) of **8<sub>Me,F</sub>**.

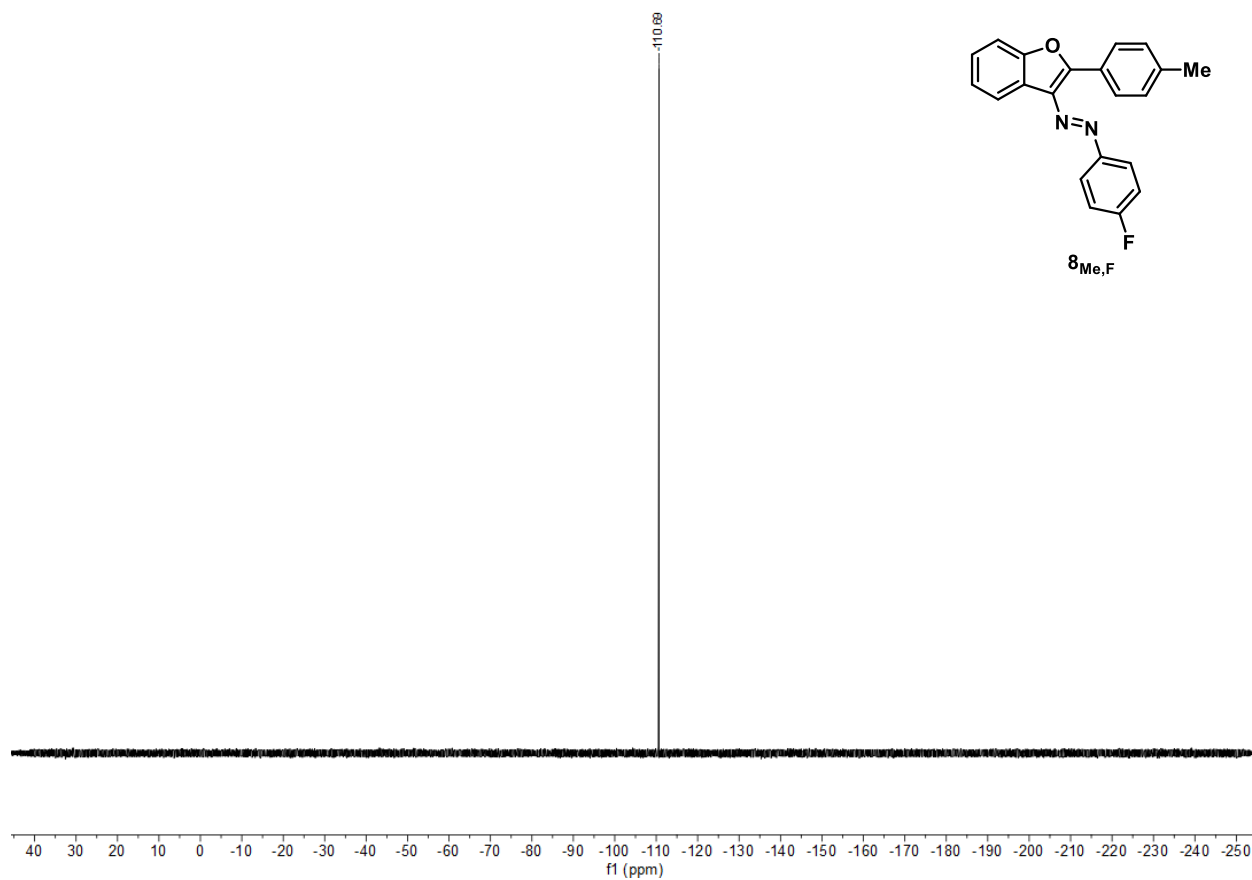

Figure S 53: <sup>19</sup>F NMR (282.76 MHz, CDCl<sub>3</sub>) of **8<sub>Me,F</sub>**.

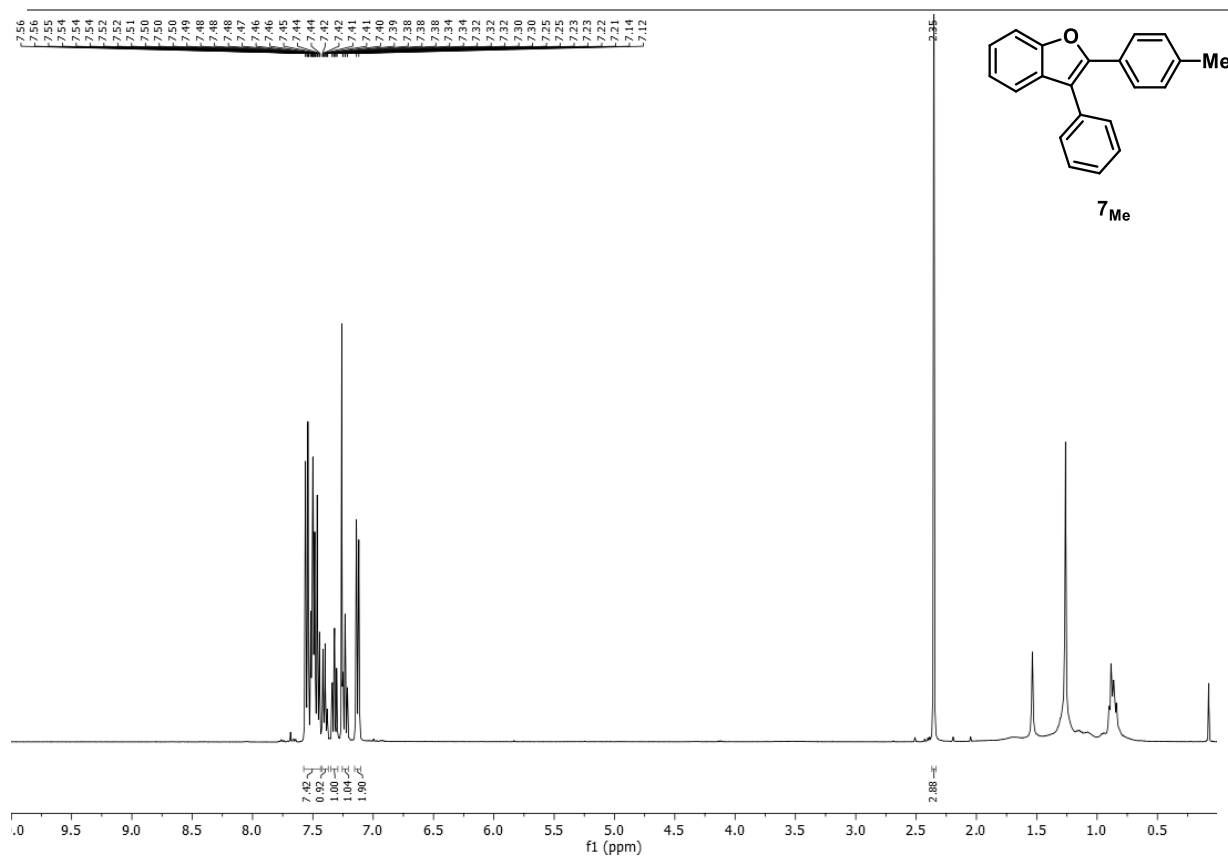Figure S 54: <sup>1</sup>H NMR (399.82 MHz, CDCl<sub>3</sub>) of **7<sub>Me</sub>** (10 mol%).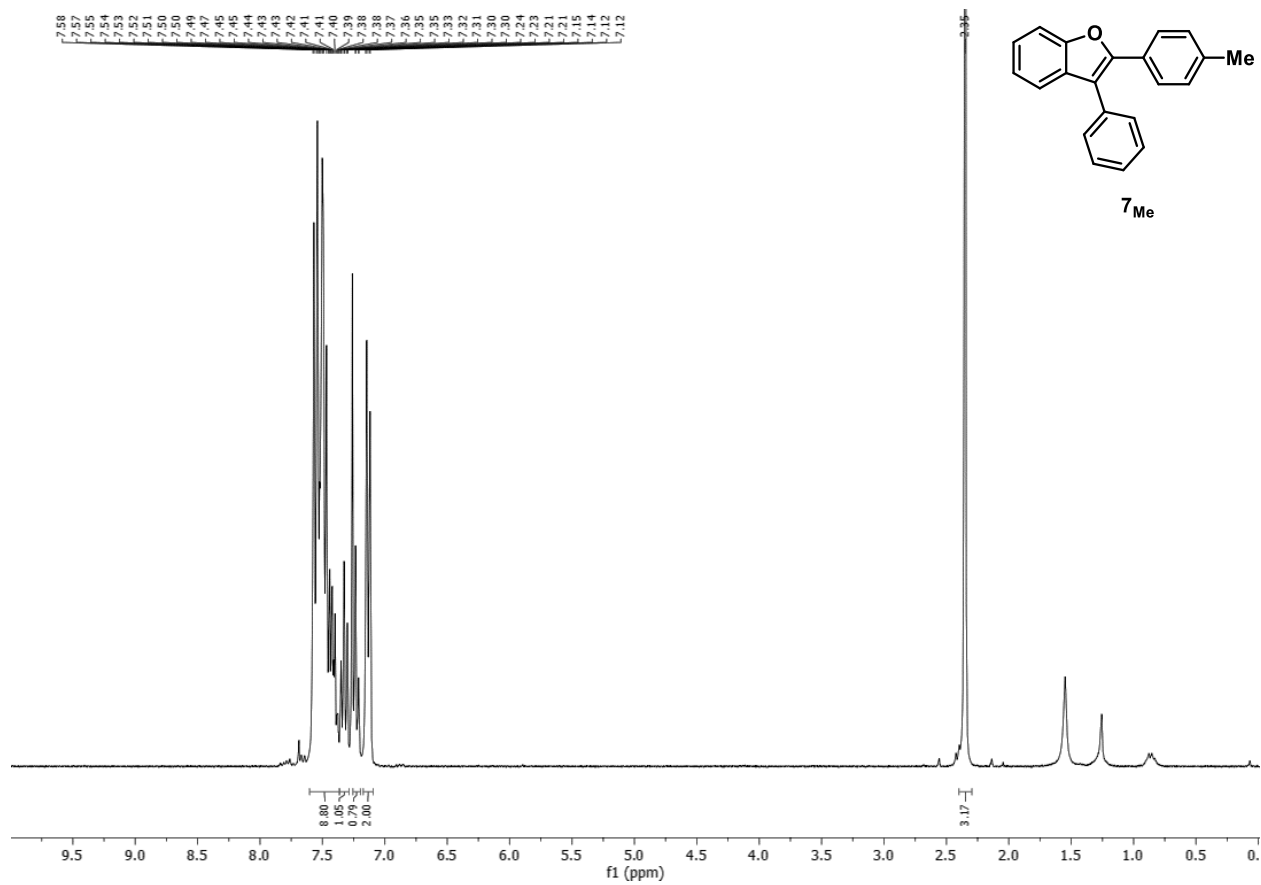Figure S 55: <sup>1</sup>H NMR (299.95 MHz, CDCl<sub>3</sub>) of **7<sub>Me</sub>** (5 mol%).

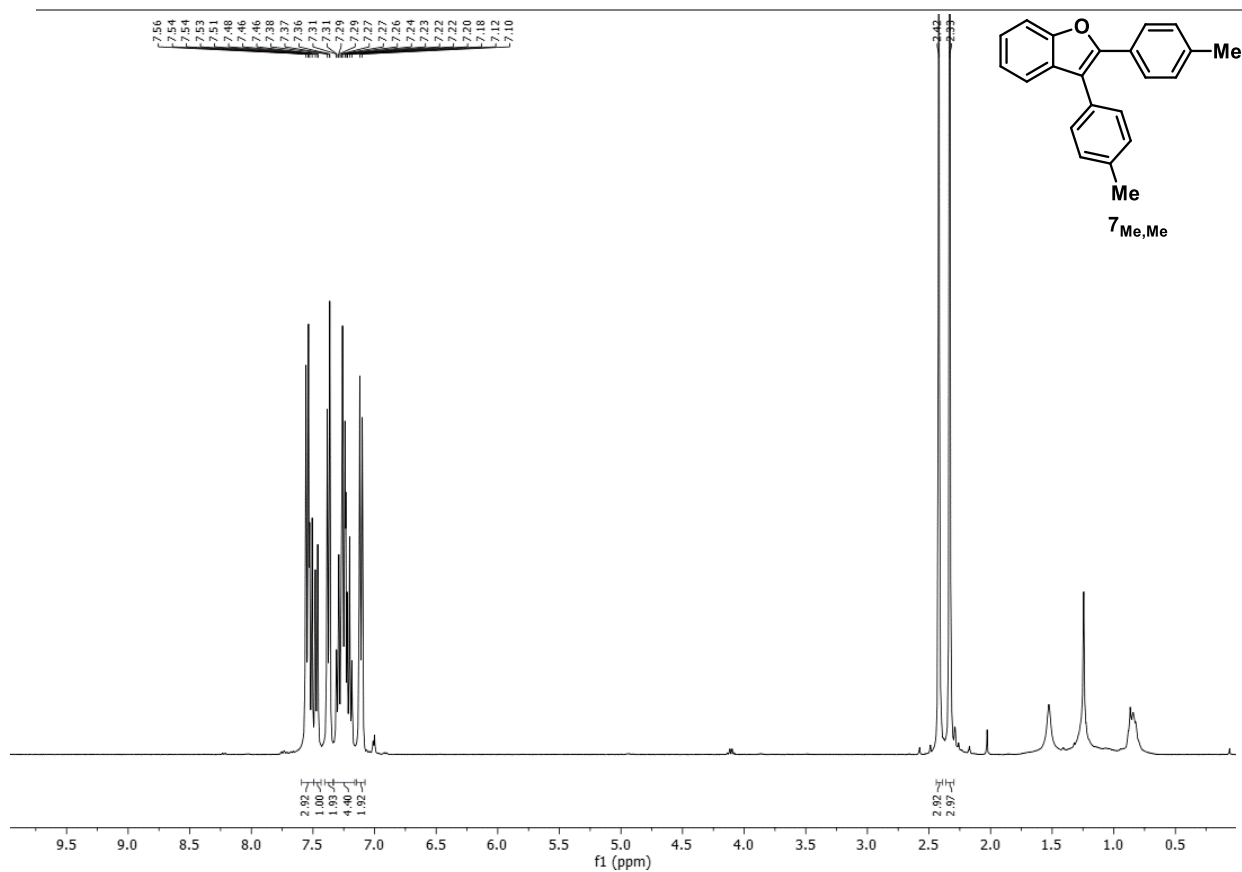**Figure S 56:**  $^1\text{H}$  NMR (399.82 MHz,  $\text{CDCl}_3$ ) of **7<sub>Me,Me</sub>**.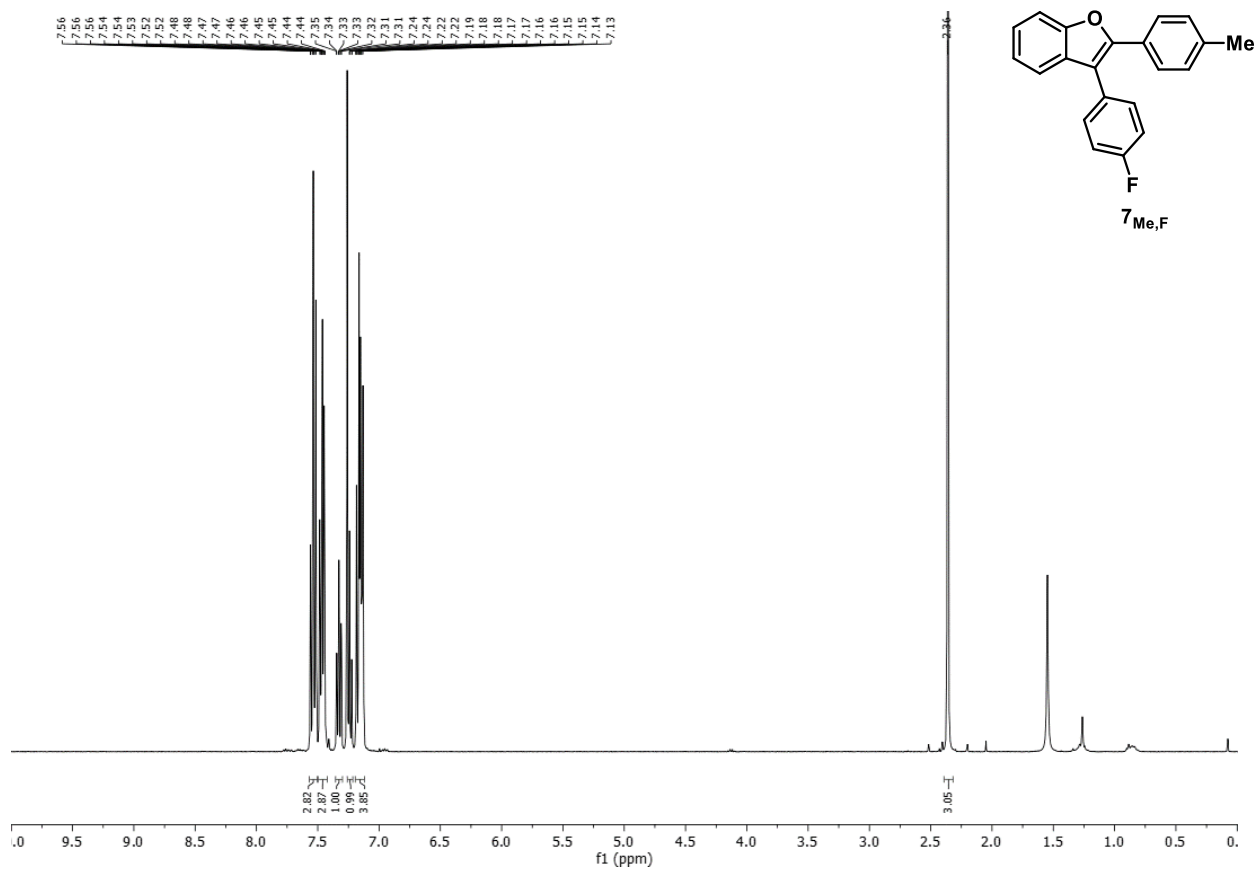**Figure S 57:**  $^1\text{H}$  NMR (399.82 MHz,  $\text{CDCl}_3$ ) of **7<sub>Me,F</sub>**.

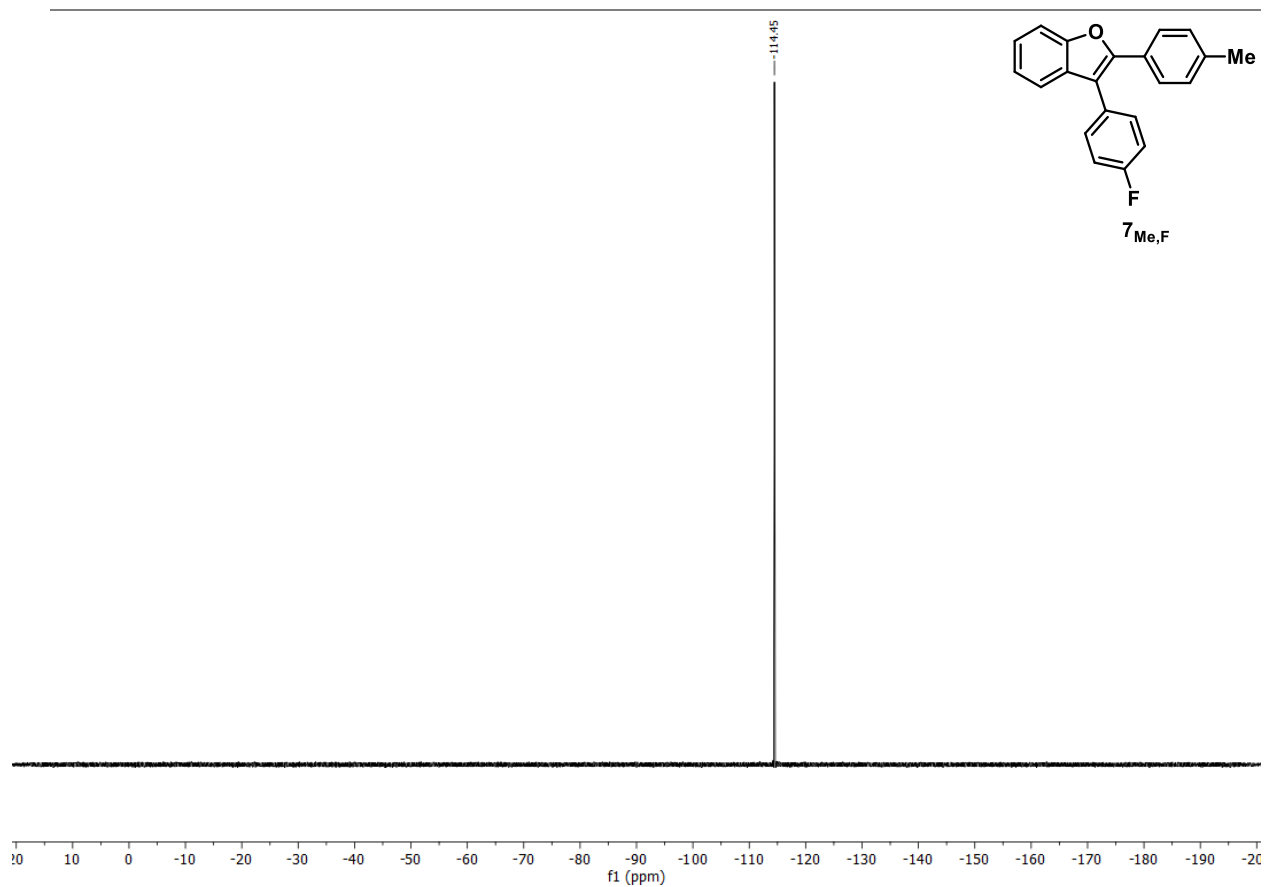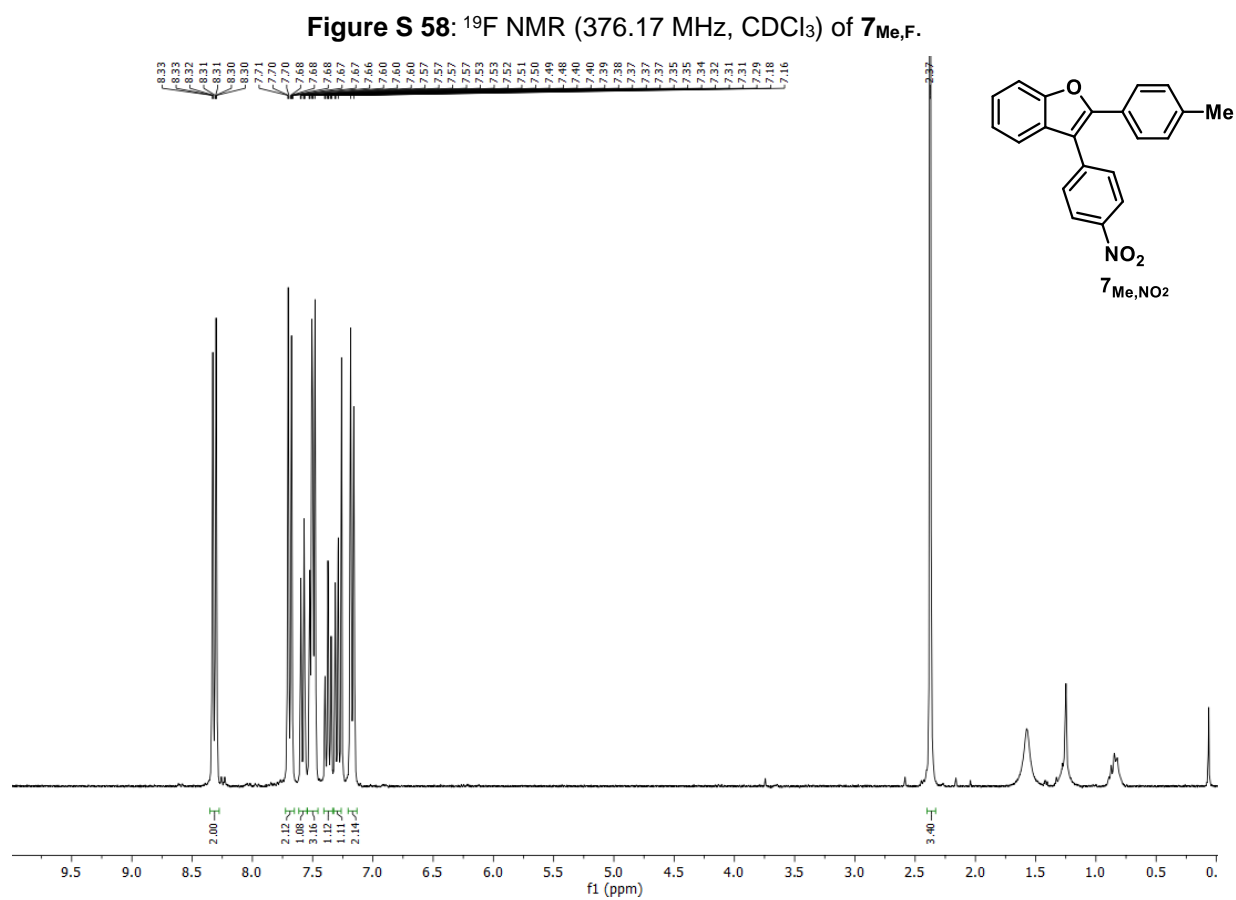

**Figure S 59:**  $^1\text{H}$  NMR (299.95 MHz,  $\text{CDCl}_3$ ) of **7<sub>Me,NO2</sub>**.

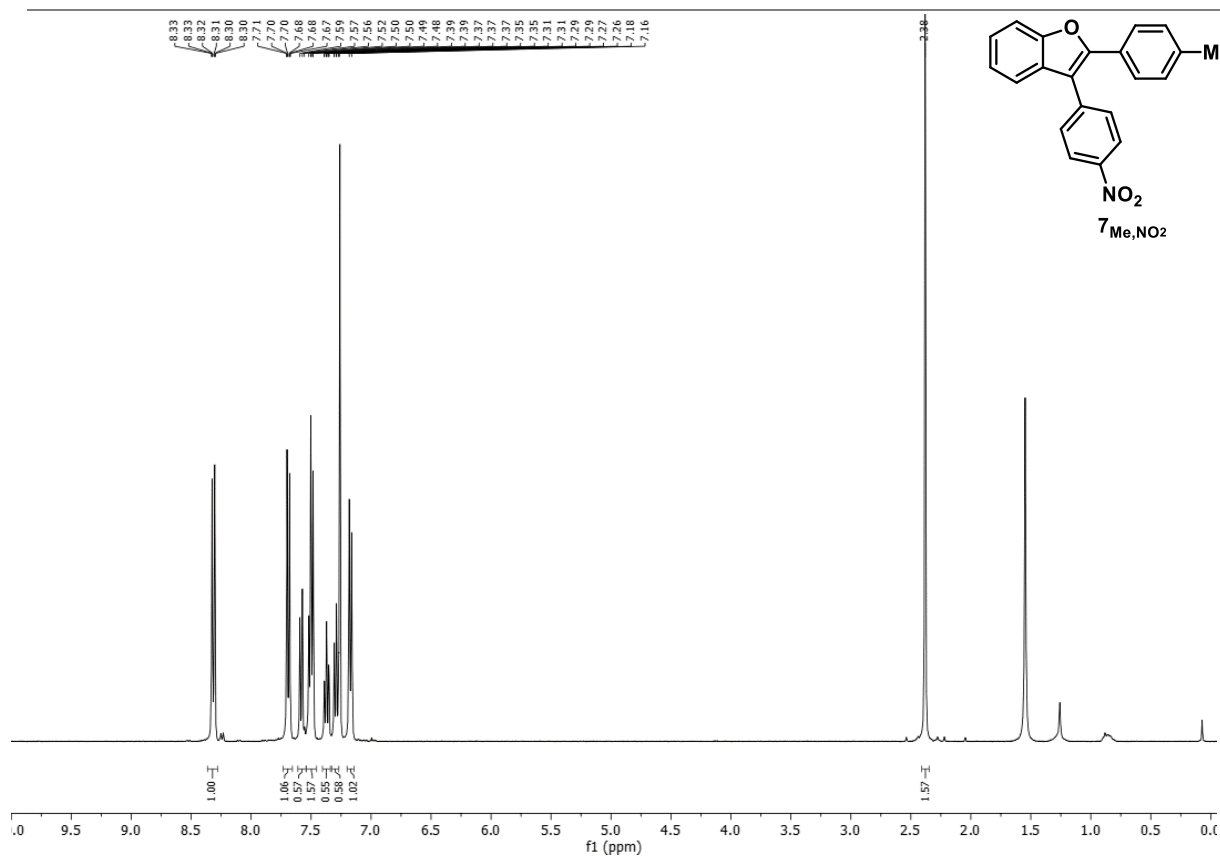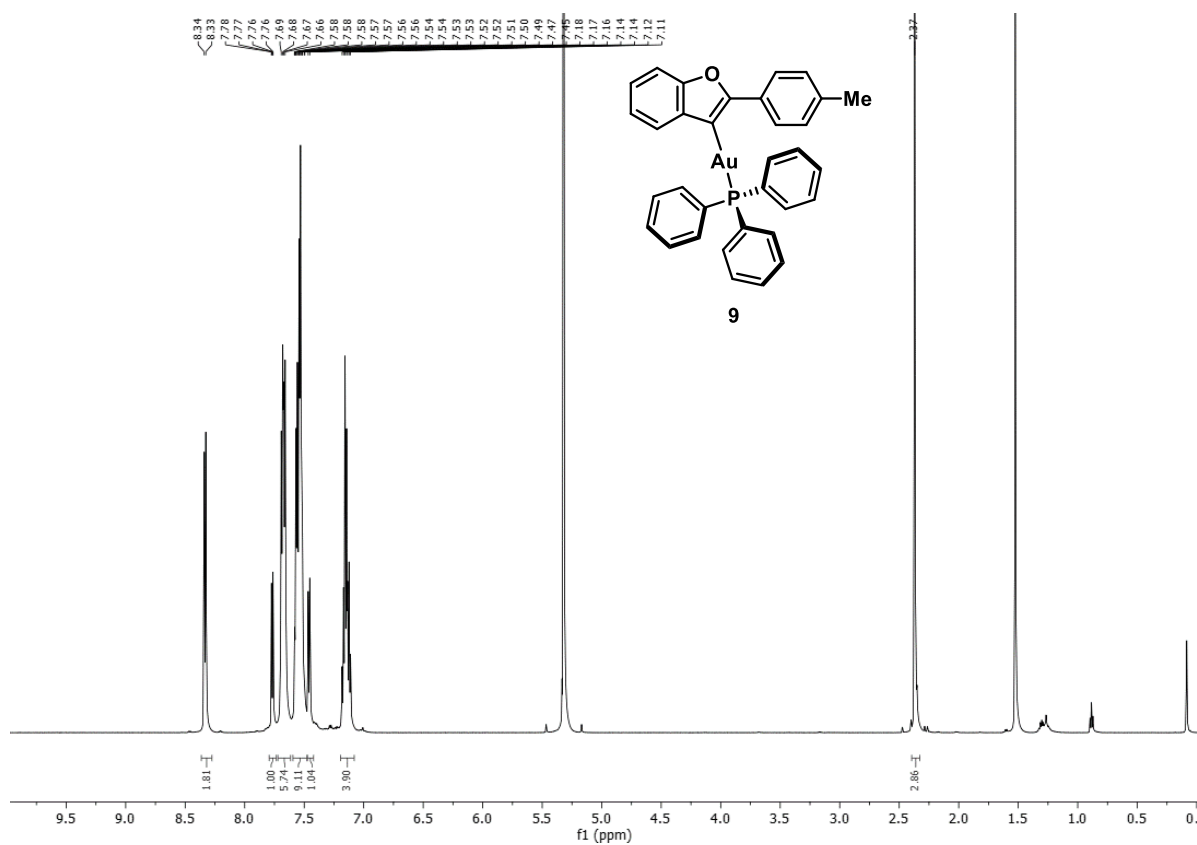

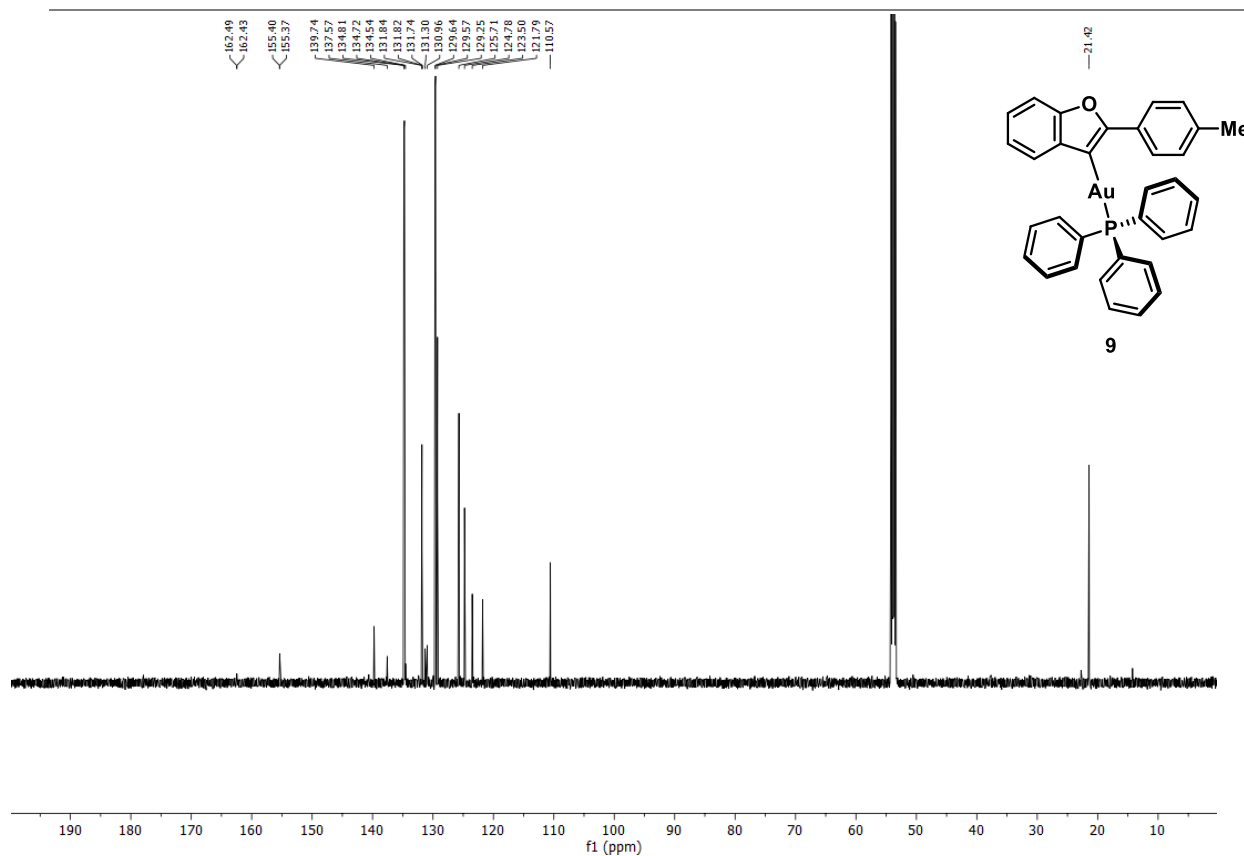Figure S 62:  $^{13}\text{C}$  NMR (150.92 MHz,  $\text{CD}_2\text{Cl}_2$ ) of 9.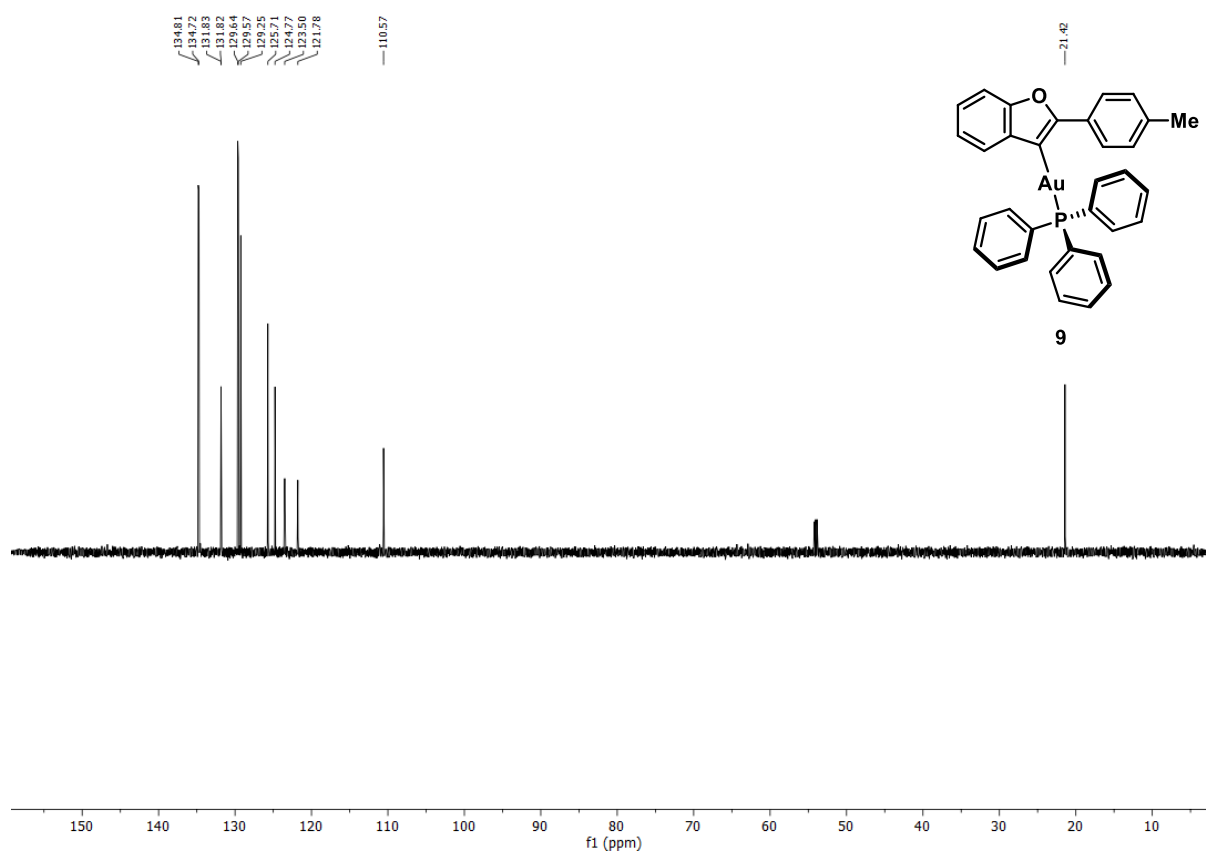Figure S 63: DEPT135 NMR (150.91 MHz,  $\text{CD}_2\text{Cl}_2$ ) of 9.



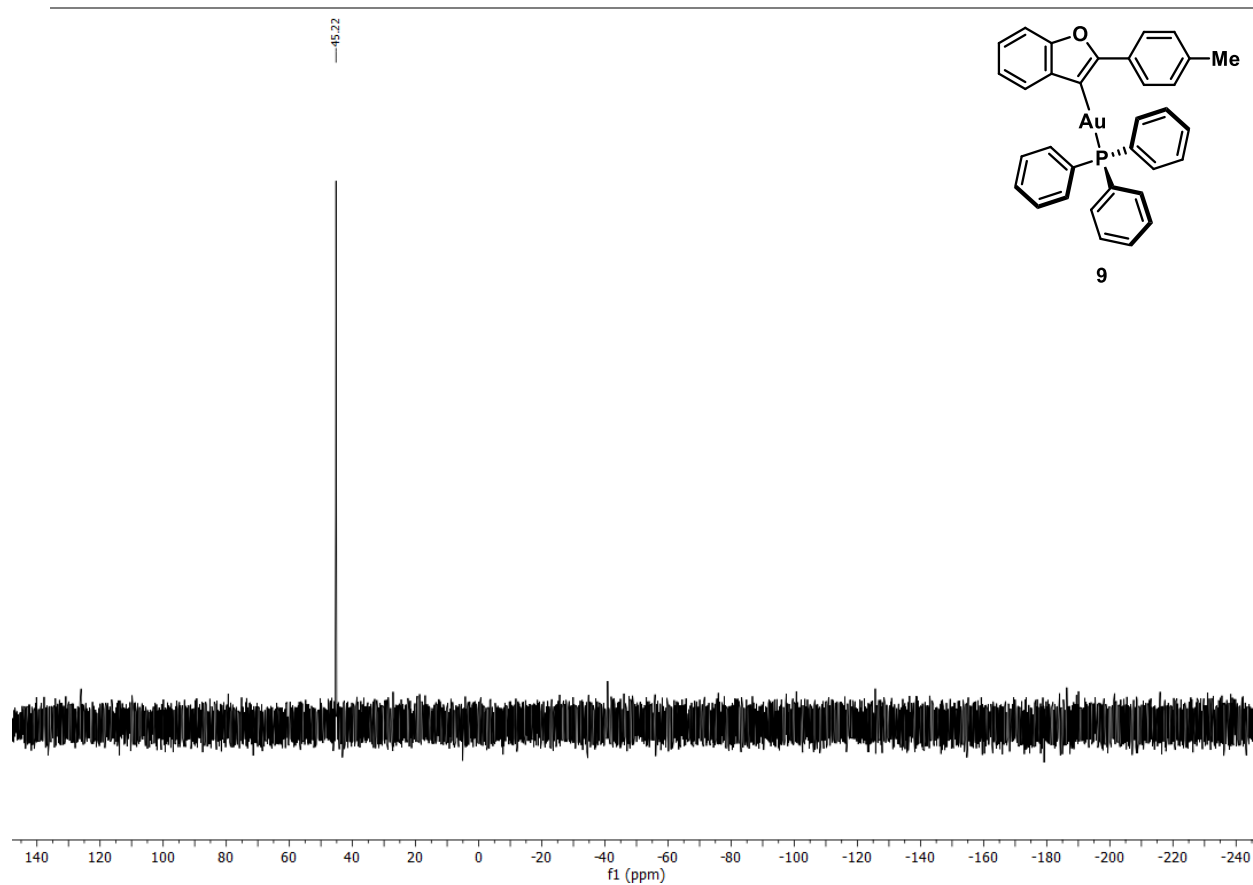

**Figure S 64:**  $^{31}\text{P}$  NMR (242.92 MHz,  $\text{CD}_2\text{Cl}_2$ ) of **9**.

## 2.2) Crystallographic Data

## 2.2.1.1) (E)-1-Phenyl-2-(2-(p-tolyl)benzofuran-3-yl)diazene

Table S 3: Crystal data and structure refinement for **8<sub>Me</sub>**.

|                                   |                                                  |                     |
|-----------------------------------|--------------------------------------------------|---------------------|
| Identification code               | <b>8<sub>Me</sub></b>                            |                     |
| Empirical formula                 | C <sub>21</sub> H <sub>16</sub> N <sub>2</sub> O |                     |
| Formula weight                    | 312.36                                           |                     |
| Temperature                       | 200(2) K                                         |                     |
| Wavelength                        | 0.71073 Å                                        |                     |
| Crystal system                    | monoclinic                                       |                     |
| Space group                       | P2 <sub>1</sub>                                  |                     |
| Z                                 | 2                                                |                     |
| Unit cell dimensions              | a = 10.013(2) Å                                  | α = 90 deg.         |
|                                   | b = 4.9243(11) Å                                 | β = 106.720(6) deg. |
|                                   | c = 16.842(4) Å                                  | γ = 90 deg.         |
| Volume                            | 795.3(3) Å <sup>3</sup>                          |                     |
| Density (calculated)              | 1.30 g/cm <sup>3</sup>                           |                     |
| Absorption coefficient            | 0.08 mm <sup>-1</sup>                            |                     |
| Crystal shape                     | needle                                           |                     |
| Crystal size                      | 0.172 x 0.072 x 0.046 mm <sup>3</sup>            |                     |
| Crystal color                     | yellow                                           |                     |
| Theta range for data collection   | 2.1 to 21.0 deg.                                 |                     |
| Index ranges                      | -10 ≤ h ≤ 9, -4 ≤ k ≤ 4, -17 ≤ l ≤ 17            |                     |
| Reflections collected             | 5423                                             |                     |
| Independent reflections           | 1695 (R(int) = 0.0779)                           |                     |
| Observed reflections              | 1086 (I > 2σ(I))                                 |                     |
| Absorption correction             | Semi-empirical from equivalents                  |                     |
| Max. and min. transmission        | 0.96 and 0.83                                    |                     |
| Refinement method                 | Full-matrix least-squares on F <sup>2</sup>      |                     |
| Data/restraints/parameters        | 1695 / 193 / 218                                 |                     |
| Goodness-of-fit on F <sup>2</sup> | 1.03                                             |                     |
| Final R indices (I > 2σ(I))       | R1 = 0.071, wR2 = 0.149                          |                     |
| Absolute structure parameter      | -6.1(10)                                         |                     |
| Largest diff. peak and hole       | 0.24 and -0.21 eÅ <sup>-3</sup>                  |                     |

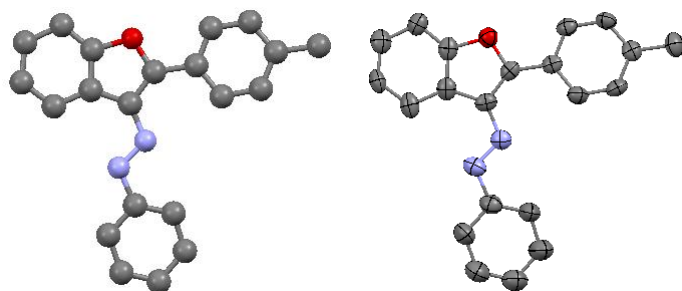

**Table S 4:** Atomic coordinates and equivalent isotropic displacement parameters ( $\text{\AA}^2$ ) for  $\mathbf{8}_{\text{Me}}$ .  $U_{\text{eq}}$  is defined as one third of the trace of the orthogonalized  $U_{ij}$  tensor.

| Atom | x          | y          | z         | $U_{\text{eq}}$ |
|------|------------|------------|-----------|-----------------|
| O1   | 0.5737(7)  | 0.3671(16) | 0.8859(4) | 0.050(2)        |
| C2   | 0.4718(11) | 0.424(2)   | 0.8130(7) | 0.040(3)        |
| C3   | 0.4884(11) | 0.258(2)   | 0.7510(6) | 0.041(3)        |
| N4   | 0.3914(9)  | 0.2614(19) | 0.6727(5) | 0.048(2)        |
| N5   | 0.4193(9)  | 0.086(2)   | 0.6219(6) | 0.055(3)        |
| C11  | 0.6593(11) | 0.153(2)   | 0.8689(8) | 0.047(3)        |
| C12  | 0.7689(11) | 0.039(2)   | 0.9253(7) | 0.050(3)        |
| H12  | 0.7982     | 0.0961     | 0.9815    | 0.060           |
| C13  | 0.8369(12) | -0.171(2)  | 0.8957(8) | 0.057(3)        |
| H13  | 0.9138     | -0.2623    | 0.9323    | 0.068           |
| C14  | 0.7915(10) | -0.245(2)  | 0.8131(7) | 0.050(3)        |
| H14  | 0.8392     | -0.3849    | 0.7937    | 0.060           |
| C15  | 0.6778(11) | -0.119(2)  | 0.7574(7) | 0.052(3)        |
| H15  | 0.6490     | -0.1727    | 0.7009    | 0.062           |
| C16  | 0.6069(11) | 0.085(3)   | 0.7858(7) | 0.046(3)        |
| C21  | 0.3720(10) | 0.636(2)   | 0.8204(7) | 0.038(3)        |
| C22  | 0.2675(11) | 0.723(2)   | 0.7507(6) | 0.048(3)        |
| H22  | 0.2598     | 0.6486     | 0.6975    | 0.058           |
| C23  | 0.1759(11) | 0.919(2)   | 0.7610(6) | 0.045(3)        |
| H23  | 0.1031     | 0.9758     | 0.7140    | 0.054           |
| C24  | 0.1853(11) | 1.038(2)   | 0.8367(7) | 0.043(3)        |
| C25  | 0.2903(11) | 0.952(2)   | 0.9041(7) | 0.048(3)        |
| H25  | 0.2989     | 1.0306     | 0.9569    | 0.057           |
| C26  | 0.3827(10) | 0.756(2)   | 0.8965(7) | 0.046(3)        |
| H26  | 0.4552     | 0.7020     | 0.9439    | 0.055           |
| C28  | 0.0806(11) | 1.248(3)   | 0.8439(7) | 0.061(3)        |
| H28A | 0.0540     | 1.2170     | 0.8948    | 0.092           |
| H28B | -0.0022    | 1.2359     | 0.7959    | 0.092           |
| H28C | 0.1219     | 1.4296     | 0.8458    | 0.092           |
| C31  | 0.3135(13) | 0.079(3)   | 0.5448(7) | 0.055(3)        |
| C32  | 0.1919(12) | 0.225(3)   | 0.5257(7) | 0.069(4)        |
| H32  | 0.1741     | 0.3492     | 0.5646    | 0.082           |
| C33  | 0.0969(14) | 0.191(3)   | 0.4501(8) | 0.081(4)        |
| H33  | 0.0112     | 0.2872     | 0.4378    | 0.097           |
| C34  | 0.1214(14) | 0.019(3)   | 0.3906(8) | 0.072(4)        |
| H34  | 0.0553     | -0.0012    | 0.3377    | 0.086           |
| C35  | 0.2423(14) | -0.118(3)  | 0.4108(8) | 0.078(4)        |
| H35  | 0.2621     | -0.2336    | 0.3705    | 0.093           |
| C36  | 0.3388(13) | -0.098(3)  | 0.4873(7) | 0.070(4)        |
| H36  | 0.4214     | -0.2048    | 0.5003    | 0.084           |

**Table S 5:** Hydrogen coordinates and isotropic displacement parameters ( $\text{\AA}^2$ ) for  $\mathbf{8}_{\text{Me}}$ .

| Atom | x      | y       | z      | $U_{\text{eq}}$ |
|------|--------|---------|--------|-----------------|
| H12  | 0.7982 | 0.0961  | 0.9815 | 0.060           |
| H13  | 0.9138 | -0.2623 | 0.9323 | 0.068           |
| H14  | 0.8392 | -0.3849 | 0.7937 | 0.060           |
| H15  | 0.6490 | -0.1727 | 0.7009 | 0.062           |
| H22  | 0.2598 | 0.6486  | 0.6975 | 0.058           |
| H23  | 0.1031 | 0.9758  | 0.7140 | 0.054           |
| H25  | 0.2989 | 1.0306  | 0.9569 | 0.057           |
| H26  | 0.4552 | 0.7020  | 0.9439 | 0.055           |
| H28A | 0.0540 | 1.2170  | 0.8948 | 0.092           |

|             |         |        |       |
|-------------|---------|--------|-------|
| H28B-0.0022 | 1.2359  | 0.7959 | 0.092 |
| H28C0.1219  | 1.4296  | 0.8458 | 0.092 |
| H32 0.1741  | 0.3492  | 0.5646 | 0.082 |
| H33 0.0112  | 0.2872  | 0.4378 | 0.097 |
| H34 0.0553  | -0.0012 | 0.3377 | 0.086 |
| H35 0.2621  | -0.2336 | 0.3705 | 0.093 |
| H36 0.4214  | -0.2048 | 0.5003 | 0.084 |

**Table S 6:** Anisotropic displacement parameters ( $\text{\AA}^2$ ) for  $\mathbf{8Me}$ . The anisotropic displacement factor exponent takes the form:  $-2 \pi^2 (h^2 a^{*2} U_{11} + \dots + 2 h k a^* b^* U_{12})$

| Atom | $U_{11}$  | $U_{22}$  | $U_{33}$ | $U_{23}$  | $U_{13}$ | $U_{12}$  |
|------|-----------|-----------|----------|-----------|----------|-----------|
| O1   | 0.047(5)  | 0.053(5)  | 0.050(4) | 0.001(4)  | 0.015(4) | 0.001(4)  |
| C2   | 0.035(6)  | 0.042(7)  | 0.044(6) | 0.011(5)  | 0.012(5) | -0.008(5) |
| C3   | 0.046(7)  | 0.042(7)  | 0.037(5) | 0.008(5)  | 0.013(5) | -0.014(5) |
| N4   | 0.049(6)  | 0.051(6)  | 0.047(5) | 0.002(5)  | 0.017(4) | -0.005(5) |
| N5   | 0.060(6)  | 0.060(7)  | 0.050(5) | -0.011(5) | 0.023(5) | -0.011(6) |
| C11  | 0.043(7)  | 0.036(8)  | 0.067(7) | 0.010(6)  | 0.024(5) | -0.007(5) |
| C12  | 0.042(7)  | 0.050(8)  | 0.059(7) | 0.011(6)  | 0.017(6) | -0.003(6) |
| C13  | 0.056(8)  | 0.042(8)  | 0.075(7) | 0.004(6)  | 0.023(6) | -0.006(6) |
| C14  | 0.045(7)  | 0.039(7)  | 0.073(7) | -0.003(7) | 0.030(6) | 0.003(6)  |
| C15  | 0.047(7)  | 0.040(7)  | 0.078(8) | 0.005(7)  | 0.035(6) | -0.006(6) |
| C16  | 0.044(7)  | 0.041(7)  | 0.059(6) | 0.010(6)  | 0.027(5) | -0.005(5) |
| C21  | 0.033(6)  | 0.043(7)  | 0.041(6) | 0.005(5)  | 0.014(5) | -0.014(5) |
| C22  | 0.058(7)  | 0.047(8)  | 0.038(6) | -0.001(6) | 0.012(5) | -0.003(6) |
| C23  | 0.043(7)  | 0.050(8)  | 0.038(6) | 0.007(6)  | 0.002(5) | -0.008(5) |
| C24  | 0.042(7)  | 0.035(7)  | 0.055(6) | 0.000(6)  | 0.019(5) | -0.012(5) |
| C25  | 0.052(8)  | 0.057(9)  | 0.037(6) | -0.004(6) | 0.017(5) | -0.003(5) |
| C26  | 0.039(7)  | 0.055(8)  | 0.042(6) | 0.001(6)  | 0.009(5) | -0.009(5) |
| C28  | 0.064(8)  | 0.045(8)  | 0.079(9) | 0.000(7)  | 0.026(7) | 0.003(6)  |
| C31  | 0.058(7)  | 0.057(8)  | 0.053(7) | -0.008(6) | 0.018(5) | -0.012(6) |
| C32  | 0.064(8)  | 0.082(10) | 0.053(7) | -0.018(8) | 0.007(6) | 0.012(7)  |
| C33  | 0.074(9)  | 0.103(13) | 0.059(8) | -0.016(8) | 0.009(6) | 0.004(8)  |
| C34  | 0.082(9)  | 0.074(11) | 0.056(8) | -0.002(7) | 0.015(7) | -0.007(7) |
| C35  | 0.088(10) | 0.073(11) | 0.069(8) | -0.021(8) | 0.018(7) | 0.001(8)  |
| C36  | 0.070(9)  | 0.079(10) | 0.064(8) | -0.015(8) | 0.023(6) | 0.010(8)  |

**Table S 7:** Bond lengths ( $\text{\AA}$ ) and angles (deg) for  $\mathbf{8Me}$ .

|         |           |          |           |
|---------|-----------|----------|-----------|
| O1-C2   | 1.380(11) | C21-C26  | 1.388(12) |
| O1-C11  | 1.436(12) | C21-C22  | 1.396(12) |
| C2-C3   | 1.374(13) | C22-C23  | 1.378(14) |
| C2-C21  | 1.476(13) | C22-H22  | 0.9500    |
| C3-N4   | 1.395(11) | C23-C24  | 1.380(13) |
| C3-C16  | 1.440(15) | C23-H23  | 0.9500    |
| N4-N5   | 1.300(11) | C24-C25  | 1.373(13) |
| N5-C31  | 1.421(12) | C24-C28  | 1.504(15) |
| C11-C12 | 1.352(13) | C25-C26  | 1.368(14) |
| C11-C16 | 1.387(13) | C25-H25  | 0.9500    |
| C12-C13 | 1.406(15) | C26-H26  | 0.9500    |
| C12-H12 | 0.9500    | C28-H28A | 0.9800    |
| C13-C14 | 1.380(13) | C28-H28B | 0.9800    |
| C13-H13 | 0.9500    | C28-H28C | 0.9800    |
| C14-C15 | 1.394(14) | C31-C32  | 1.370(16) |
| C14-H14 | 0.9500    | C31-C36  | 1.381(15) |
| C15-C16 | 1.393(15) | C32-C33  | 1.363(13) |
| C15-H15 | 0.9500    | C32-H32  | 0.9500    |

|               |           |             |           |
|---------------|-----------|-------------|-----------|
| C33-C34       | 1.386(16) | C33-C32-H32 | 120.4     |
| C33-H33       | 0.9500    | C31-C32-H32 | 120.4     |
| C34-C35       | 1.341(16) | C32-C33-C34 | 122.0(14) |
| C34-H34       | 0.9500    | C32-C33-H33 | 119.0     |
| C35-C36       | 1.372(14) | C34-C33-H33 | 119.0     |
| C35-H35       | 0.9500    | C35-C34-C33 | 117.2(13) |
| C36-H36       | 0.9500    | C35-C34-H34 | 121.4     |
| C2-O1-C11     | 107.6(8)  | C33-C34-H34 | 121.4     |
| C3-C2-O1      | 109.5(9)  | C34-C35-C36 | 123.0(14) |
| C3-C2-C21     | 135.9(10) | C34-C35-H35 | 118.5     |
| O1-C2-C21     | 114.5(9)  | C36-C35-H35 | 118.5     |
| C2-C3-N4      | 120.5(10) | C35-C36-C31 | 118.7(13) |
| C2-C3-C16     | 107.9(10) | C35-C36-H36 | 120.6     |
| N4-C3-C16     | 131.3(11) | C31-C36-H36 | 120.6     |
| N5-N4-C3      | 113.0(9)  |             |           |
| N4-N5-C31     | 112.0(9)  |             |           |
| C12-C11-C16   | 127.1(11) |             |           |
| C12-C11-O1    | 125.2(11) |             |           |
| C16-C11-O1    | 107.7(10) |             |           |
| C11-C12-C13   | 115.8(11) |             |           |
| C11-C12-H12   | 122.1     |             |           |
| C13-C12-H12   | 122.1     |             |           |
| C14-C13-C12   | 119.9(11) |             |           |
| C14-C13-H13   | 120.1     |             |           |
| C12-C13-H13   | 120.1     |             |           |
| C13-C14-C15   | 122.0(11) |             |           |
| C13-C14-H14   | 119.0     |             |           |
| C15-C14-H14   | 119.0     |             |           |
| C16-C15-C14   | 119.2(12) |             |           |
| C16-C15-H15   | 120.4     |             |           |
| C14-C15-H15   | 120.4     |             |           |
| C11-C16-C15   | 116.0(11) |             |           |
| C11-C16-C3    | 107.2(11) |             |           |
| C15-C16-C3    | 136.8(12) |             |           |
| C26-C21-C22   | 119.1(10) |             |           |
| C26-C21-C2    | 120.3(10) |             |           |
| C22-C21-C2    | 120.5(10) |             |           |
| C23-C22-C21   | 118.3(10) |             |           |
| C23-C22-H22   | 120.8     |             |           |
| C21-C22-H22   | 120.8     |             |           |
| C22-C23-C24   | 122.8(10) |             |           |
| C22-C23-H23   | 118.6     |             |           |
| C24-C23-H23   | 118.6     |             |           |
| C25-C24-C23   | 117.9(11) |             |           |
| C25-C24-C28   | 122.0(11) |             |           |
| C23-C24-C28   | 120.1(10) |             |           |
| C26-C25-C24   | 121.1(11) |             |           |
| C26-C25-H25   | 119.4     |             |           |
| C24-C25-H25   | 119.4     |             |           |
| C25-C26-C21   | 120.8(10) |             |           |
| C25-C26-H26   | 119.6     |             |           |
| C21-C26-H26   | 119.6     |             |           |
| C24-C28-H28A  | 109.5     |             |           |
| C24-C28-H28B  | 109.5     |             |           |
| H28A-C28-H28B | 109.5     |             |           |
| C24-C28-H28C  | 109.5     |             |           |
| H28A-C28-H28C | 109.5     |             |           |
| H28B-C28-H28C | 109.5     |             |           |
| C32-C31-C36   | 119.8(12) |             |           |
| C32-C31-N5    | 125.4(11) |             |           |
| C36-C31-N5    | 114.8(11) |             |           |
| C33-C32-C31   | 119.2(13) |             |           |

---

**Short experimental description:**

yellow crystal (needle), dimensions 0.172 x 0.072 x 0.046 mm<sup>3</sup>, crystal system monoclinic, space group P2<sub>1</sub>, Z=2, a=10.013(2) Å, b=4.9243(11) Å, c=16.842(4) Å, alpha=90 deg, beta=106.720(6) deg, gamma=90 deg, V=795.3(3) Å<sup>3</sup>, rho=1.304 g/cm<sup>3</sup>, T=200(2) K, Theta<sub>max</sub>= 21.031 deg, radiation Mo Kalpha, lambda=0.71073 Å, 0.5 deg omega-scans with CCD area detector, covering the asymmetric unit in reciprocal space with a mean redundancy of 5.55 and a completeness of 99.9% to a resolution of 0.95 Å,<sup>[33]</sup> 5423 reflections measured, 1695 unique (R(int)=0.0779), 1086 observed (I > 2σ(I)), intensities were corrected for Lorentz and polarization effects, an empirical scaling and absorption correction was applied using SADABS<sup>[34]</sup> based on the Laue symmetry of the reciprocal space, T<sub>min</sub>=0.83, T<sub>max</sub>=0.96, structure solved with SHELXT-2014 (Sheldrick 2014)<sup>[35]</sup> and refined against F<sup>2</sup> with a Full-matrix least-squares algorithm using the SHELXL-2016/6 (Sheldrick, 2016) software,<sup>[36]</sup> 218 parameters refined, hydrogen atoms were treated using appropriate riding models, Flack absolute structure parameter -6.1(10), goodness of fit 1.03 for observed reflections, final residual values R1(F)=0.071, wR(F<sup>2</sup>)=0.149 for observed reflections, residual electron density -0.21 to 0.24 eÅ<sup>-3</sup>.

CCDC 1915768 contains the supplementary crystallographic data for this paper. These data can be obtained free of charge from The Cambridge Crystallographic Data Centre via <https://www.ccdc.cam.ac.uk/structures/>.

## 2.2.1.2) (E)-1-(2-(4-Methoxyphenyl)benzofuran-3-yl)-2-phenyldiazene

Table S 8: Crystal data and structure refinement for **8<sub>OMe</sub>**.

|                                   |                                                               |                     |
|-----------------------------------|---------------------------------------------------------------|---------------------|
| Identification code               | <b>8<sub>OMe</sub></b>                                        |                     |
| Empirical formula                 | C <sub>21</sub> H <sub>16</sub> N <sub>2</sub> O <sub>2</sub> |                     |
| Formula weight                    | 328.36                                                        |                     |
| Temperature                       | 200(2) K                                                      |                     |
| Wavelength                        | 0.71073 Å                                                     |                     |
| Crystal system                    | monoclinic                                                    |                     |
| Space group                       | P2 <sub>1</sub> /c                                            |                     |
| Z                                 | 4                                                             |                     |
| Unit cell dimensions              | a = 18.331(5) Å                                               | α = 90 deg.         |
|                                   | b = 4.6232(14) Å                                              | β = 107.210(8) deg. |
|                                   | c = 19.854(6) Å                                               | γ = 90 deg.         |
| Volume                            | 1607.3(8) Å <sup>3</sup>                                      |                     |
| Density (calculated)              | 1.36 g/cm <sup>3</sup>                                        |                     |
| Absorption coefficient            | 0.09 mm <sup>-1</sup>                                         |                     |
| Crystal shape                     | plank                                                         |                     |
| Crystal size                      | 0.142 x 0.050 x 0.047 mm <sup>3</sup>                         |                     |
| Crystal color                     | orange                                                        |                     |
| Theta range for data collection   | 1.2 to 19.8 deg.                                              |                     |
| Index ranges                      | -17 ≤ h ≤ 17, -4 ≤ k ≤ 4, -18 ≤ l ≤ 18                        |                     |
| Reflections collected             | 5655                                                          |                     |
| Independent reflections           | 1458 (R(int) = 0.1032)                                        |                     |
| Observed reflections              | 861 (I > 2σ(I))                                               |                     |
| Absorption correction             | Semi-empirical from equivalents                               |                     |
| Max. and min. transmission        | 0.96 and 0.84                                                 |                     |
| Refinement method                 | Full-matrix least-squares on F <sup>2</sup>                   |                     |
| Data/restraints/parameters        | 1458 / 198 / 227                                              |                     |
| Goodness-of-fit on F <sup>2</sup> | 0.98                                                          |                     |
| Final R indices (I > 2σ(I))       | R1 = 0.058, wR2 = 0.124                                       |                     |
| Largest diff. peak and hole       | 0.20 and -0.24 eÅ <sup>-3</sup>                               |                     |

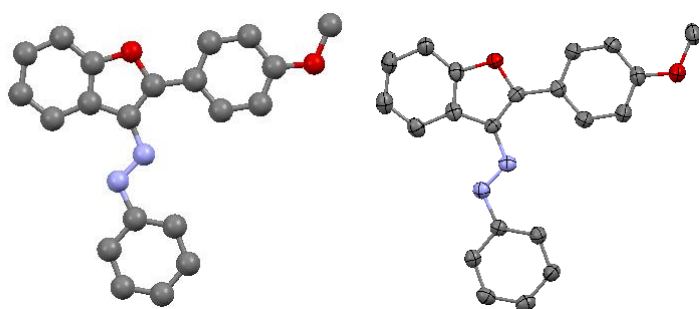Table S 9: Atomic coordinates and equivalent isotropic displacement parameters (Å<sup>2</sup>) for **8<sub>OMe</sub>**. U<sub>eq</sub> is defined as one third of the trace of the orthogonalized U<sub>ij</sub> tensor.

| Atom | x         | y          | z         | U <sub>eq</sub> |
|------|-----------|------------|-----------|-----------------|
| O1   | 0.6723(2) | 1.1478(8)  | 0.6698(2) | 0.0369(11)      |
| C2   | 0.6995(3) | 0.9722(13) | 0.7284(3) | 0.0321(15)      |
| C3   | 0.7610(3) | 0.8174(13) | 0.7226(3) | 0.0315(15)      |
| N4   | 0.7967(3) | 0.6108(11) | 0.7735(2) | 0.0350(14)      |
| N5   | 0.8544(3) | 0.4861(11) | 0.7620(2) | 0.0369(14)      |
| C11  | 0.7195(3) | 1.1008(14) | 0.6272(3) | 0.0377(17)      |
| C12  | 0.7112(3) | 1.2370(14) | 0.5636(3) | 0.0437(18)      |
| H12  | 0.6709    | 1.3702     | 0.5445    | 0.052           |

|      |           |             |           |            |
|------|-----------|-------------|-----------|------------|
| C13  | 0.7637(4) | 1.1709(14)  | 0.5294(3) | 0.0484(19) |
| H13  | 0.7601    | 1.2586      | 0.4853    | 0.058      |
| C14  | 0.8228(4) | 0.9745(14)  | 0.5590(3) | 0.0470(18) |
| H14  | 0.8592    | 0.9329      | 0.5348    | 0.056      |
| C15  | 0.8291(4) | 0.8398(13)  | 0.6229(3) | 0.0430(18) |
| H15  | 0.8694    | 0.7075      | 0.6425    | 0.052      |
| C16  | 0.7752(3) | 0.9016(13)  | 0.6579(3) | 0.0338(16) |
| C21  | 0.6587(3) | 0.9958(13)  | 0.7807(3) | 0.0332(16) |
| C22  | 0.6787(3) | 0.8356(14)  | 0.8428(3) | 0.0423(18) |
| H22  | 0.7208    | 0.7065      | 0.8520    | 0.051      |
| C23  | 0.6385(4) | 0.8609(14)  | 0.8910(3) | 0.0454(18) |
| H23  | 0.6532    | 0.7514      | 0.9334    | 0.054      |
| C24  | 0.5769(3) | 1.0447(14)  | 0.8778(3) | 0.0391(17) |
| C25  | 0.5563(3) | 1.2069(14)  | 0.8174(3) | 0.0434(18) |
| H25  | 0.5143    | 1.3362      | 0.8088    | 0.052      |
| C26  | 0.5969(3) | 1.1821(14)  | 0.7689(3) | 0.0397(18) |
| H26  | 0.5822    | 1.2943      | 0.7269    | 0.048      |
| O28  | 0.5399(2) | 1.0513(9)   | 0.9288(2) | 0.0505(13) |
| C28  | 0.4754(3) | 1.2436(15)  | 0.9173(3) | 0.055(2)   |
| H28A | 0.4537    | 1.2270      | 0.9567    | 0.083      |
| H28B | 0.4366    | 1.1911      | 0.8733    | 0.083      |
| H28C | 0.4920    | 1.4432      | 0.9141    | 0.083      |
| C31  | 0.8880(3) | 0.2778(13)  | 0.8154(3) | 0.0314(15) |
| C32  | 0.8617(3) | 0.2133(13)  | 0.8726(3) | 0.0398(17) |
| H32  | 0.8182    | 0.3111      | 0.8779    | 0.048      |
| C33  | 0.8980(3) | 0.0093(13)  | 0.9212(3) | 0.0417(17) |
| H33  | 0.8793    | -0.0358     | 0.9598    | 0.050      |
| C34  | 0.9621(3) | -0.1302(14) | 0.9139(3) | 0.0426(18) |
| H34  | 0.9872    | -0.2718     | 0.9474    | 0.051      |
| C35  | 0.9898(3) | -0.0644(13) | 0.8579(3) | 0.0407(17) |
| H35  | 1.0340    | -0.1589     | 0.8532    | 0.049      |
| C36  | 0.9523(3) | 0.1406(13)  | 0.8089(3) | 0.0356(17) |
| H36  | 0.9711    | 0.1867      | 0.7704    | 0.043      |

**Table S 10:** Hydrogen coordinates and isotropic displacement parameters ( $\text{\AA}^2$ ) for  $\mathbf{8}_{\text{OMe}}$ .

| Atom | x      | y       | z      | $U_{\text{eq}}$ |
|------|--------|---------|--------|-----------------|
| H12  | 0.6709 | 1.3702  | 0.5445 | 0.052           |
| H13  | 0.7601 | 1.2586  | 0.4853 | 0.058           |
| H14  | 0.8592 | 0.9329  | 0.5348 | 0.056           |
| H15  | 0.8694 | 0.7075  | 0.6425 | 0.052           |
| H22  | 0.7208 | 0.7065  | 0.8520 | 0.051           |
| H23  | 0.6532 | 0.7514  | 0.9334 | 0.054           |
| H25  | 0.5143 | 1.3362  | 0.8088 | 0.052           |
| H26  | 0.5822 | 1.2943  | 0.7269 | 0.048           |
| H28A | 0.4537 | 1.2270  | 0.9567 | 0.083           |
| H28B | 0.4366 | 1.1911  | 0.8733 | 0.083           |
| H28C | 0.4920 | 1.4432  | 0.9141 | 0.083           |
| H32  | 0.8182 | 0.3111  | 0.8779 | 0.048           |
| H33  | 0.8793 | -0.0358 | 0.9598 | 0.050           |
| H34  | 0.9872 | -0.2718 | 0.9474 | 0.051           |
| H35  | 1.0340 | -0.1589 | 0.8532 | 0.049           |
| H36  | 0.9711 | 0.1867  | 0.7704 | 0.043           |



**Table S 11:** Anisotropic displacement parameters ( $\text{\AA}^2$ ) for  $\mathbf{8}_{\text{OMe}}$ . The anisotropic displacement factor exponent takes the form:  $-2 \pi^2 (h^2 a^{*2} U_{11} + \dots + 2 h k a^* b^* U_{12})$

| Atom | $U_{11}$ | $U_{22}$ | $U_{33}$ | $U_{23}$  | $U_{13}$ | $U_{12}$  |
|------|----------|----------|----------|-----------|----------|-----------|
| O1   | 0.035(3) | 0.041(3) | 0.034(3) | 0.004(2)  | 0.009(2) | 0.003(2)  |
| C2   | 0.028(4) | 0.034(4) | 0.030(3) | 0.003(3)  | 0.002(3) | -0.007(3) |
| C3   | 0.029(4) | 0.034(4) | 0.030(4) | 0.001(3)  | 0.005(3) | -0.003(3) |
| N4   | 0.032(3) | 0.035(3) | 0.035(3) | -0.002(3) | 0.004(3) | -0.002(2) |
| N5   | 0.039(3) | 0.034(3) | 0.037(3) | -0.002(3) | 0.011(3) | 0.000(3)  |
| C11  | 0.032(4) | 0.043(5) | 0.040(4) | -0.003(3) | 0.013(3) | -0.008(3) |
| C12  | 0.048(4) | 0.045(5) | 0.042(4) | 0.001(3)  | 0.020(4) | 0.002(4)  |
| C13  | 0.061(5) | 0.053(5) | 0.038(4) | -0.006(4) | 0.024(4) | -0.004(4) |
| C14  | 0.053(5) | 0.044(5) | 0.051(4) | -0.008(4) | 0.026(4) | -0.009(3) |
| C15  | 0.045(4) | 0.037(5) | 0.050(4) | -0.008(3) | 0.019(4) | -0.002(3) |
| C16  | 0.030(4) | 0.039(4) | 0.030(4) | -0.011(3) | 0.005(3) | -0.008(3) |
| C21  | 0.029(4) | 0.033(4) | 0.037(4) | -0.002(3) | 0.010(3) | -0.006(3) |
| C22  | 0.036(4) | 0.049(5) | 0.042(4) | 0.003(3)  | 0.012(3) | 0.006(3)  |
| C23  | 0.046(4) | 0.056(5) | 0.037(4) | 0.005(4)  | 0.016(3) | 0.004(3)  |
| C24  | 0.037(4) | 0.047(5) | 0.037(4) | -0.006(3) | 0.016(4) | -0.006(3) |
| C25  | 0.033(4) | 0.050(5) | 0.049(4) | 0.009(4)  | 0.014(3) | 0.008(3)  |
| C26  | 0.042(4) | 0.045(5) | 0.033(4) | 0.001(3)  | 0.012(3) | 0.004(3)  |
| O28  | 0.051(3) | 0.063(4) | 0.041(3) | 0.007(3)  | 0.020(2) | 0.008(2)  |
| C28  | 0.052(5) | 0.074(6) | 0.047(4) | -0.001(4) | 0.026(4) | 0.005(4)  |
| C31  | 0.032(4) | 0.028(4) | 0.034(4) | -0.003(3) | 0.008(3) | -0.002(3) |
| C32  | 0.040(4) | 0.043(5) | 0.037(4) | -0.002(3) | 0.013(3) | 0.004(3)  |
| C33  | 0.048(4) | 0.041(5) | 0.036(4) | 0.005(3)  | 0.013(4) | 0.003(3)  |
| C34  | 0.043(4) | 0.037(5) | 0.044(4) | 0.006(3)  | 0.007(3) | -0.003(3) |
| C35  | 0.036(4) | 0.034(4) | 0.051(4) | -0.003(3) | 0.012(3) | 0.002(3)  |
| C36  | 0.036(4) | 0.035(4) | 0.038(4) | -0.004(3) | 0.014(3) | -0.004(3) |

**Table S 12:** Bond lengths ( $\text{\AA}$ ) and angles (deg) for  $\mathbf{8}_{\text{OMe}}$ .

|         |          |           |          |
|---------|----------|-----------|----------|
| O1-C2   | 1.386(6) | C25-C26   | 1.385(7) |
| O1-C11  | 1.395(6) | C25-H25   | 0.9500   |
| C2-C3   | 1.368(7) | C26-H26   | 0.9500   |
| C2-C21  | 1.452(7) | O28-C28   | 1.443(6) |
| C3-N4   | 1.404(7) | C28-H28A  | 0.9800   |
| C3-C16  | 1.438(7) | C28-H28B  | 0.9800   |
| N4-N5   | 1.283(6) | C28-H28C  | 0.9800   |
| N5-C31  | 1.431(7) | C31-C36   | 1.378(7) |
| C11-C16 | 1.376(8) | C31-C32   | 1.390(7) |
| C11-C12 | 1.377(8) | C32-C33   | 1.374(8) |
| C12-C13 | 1.367(7) | C32-H32   | 0.9500   |
| C12-H12 | 0.9500   | C33-C34   | 1.385(7) |
| C13-C14 | 1.402(8) | C33-H33   | 0.9500   |
| C13-H13 | 0.9500   | C34-C35   | 1.385(7) |
| C14-C15 | 1.387(8) | C34-H34   | 0.9500   |
| C14-H14 | 0.9500   | C35-C36   | 1.387(8) |
| C15-C16 | 1.394(8) | C35-H35   | 0.9500   |
| C15-H15 | 0.9500   | C36-H36   | 0.9500   |
| C21-C26 | 1.388(7) | C2-O1-C11 | 106.5(5) |
| C21-C22 | 1.391(8) | C3-C2-O1  | 109.7(5) |
| C22-C23 | 1.376(7) | C3-C2-C21 | 135.3(6) |
| C22-H22 | 0.9500   | O1-C2-C21 | 115.0(5) |
| C23-C24 | 1.374(8) | C2-C3-N4  | 121.0(5) |
| C23-H23 | 0.9500   | C2-C3-C16 | 107.8(5) |
| C24-C25 | 1.370(8) | N4-C3-C16 | 131.2(6) |
| C24-O28 | 1.376(6) | N5-N4-C3  | 114.3(5) |

---

|               |          |
|---------------|----------|
| N4-N5-C31     | 111.6(5) |
| C16-C11-C12   | 125.3(6) |
| C16-C11-O1    | 110.4(5) |
| C12-C11-O1    | 124.3(6) |
| C13-C12-C11   | 116.7(6) |
| C13-C12-H12   | 121.6    |
| C11-C12-H12   | 121.6    |
| C12-C13-C14   | 120.4(6) |
| C12-C13-H13   | 119.8    |
| C14-C13-H13   | 119.8    |
| C15-C14-C13   | 121.3(6) |
| C15-C14-H14   | 119.3    |
| C13-C14-H14   | 119.3    |
| C14-C15-C16   | 118.9(6) |
| C14-C15-H15   | 120.5    |
| C16-C15-H15   | 120.5    |
| C11-C16-C15   | 117.3(6) |
| C11-C16-C3    | 105.6(5) |
| C15-C16-C3    | 137.0(6) |
| C26-C21-C22   | 117.9(6) |
| C26-C21-C2    | 119.6(6) |
| C22-C21-C2    | 122.5(6) |
| C23-C22-C21   | 121.2(6) |
| C23-C22-H22   | 119.4    |
| C21-C22-H22   | 119.4    |
| C24-C23-C22   | 119.9(6) |
| C24-C23-H23   | 120.1    |
| C22-C23-H23   | 120.1    |
| C25-C24-C23   | 120.3(6) |
| C25-C24-O28   | 124.3(6) |
| C23-C24-O28   | 115.4(6) |
| C24-C25-C26   | 119.9(6) |
| C24-C25-H25   | 120.1    |
| C26-C25-H25   | 120.1    |
| C25-C26-C21   | 120.9(6) |
| C25-C26-H26   | 119.5    |
| C21-C26-H26   | 119.5    |
| C24-O28-C28   | 117.2(5) |
| O28-C28-H28A  | 109.5    |
| O28-C28-H28B  | 109.5    |
| H28A-C28-H28B | 109.5    |
| O28-C28-H28C  | 109.5    |
| H28A-C28-H28C | 109.5    |
| H28B-C28-H28C | 109.5    |
| C36-C31-C32   | 119.5(6) |
| C36-C31-N5    | 115.7(5) |
| C32-C31-N5    | 124.8(5) |
| C33-C32-C31   | 120.5(6) |
| C33-C32-H32   | 119.7    |
| C31-C32-H32   | 119.7    |
| C32-C33-C34   | 119.7(6) |
| C32-C33-H33   | 120.1    |
| C34-C33-H33   | 120.1    |
| C35-C34-C33   | 120.4(6) |
| C35-C34-H34   | 119.8    |
| C33-C34-H34   | 119.8    |
| C34-C35-C36   | 119.4(6) |
| C34-C35-H35   | 120.3    |
| C36-C35-H35   | 120.3    |
| C31-C36-C35   | 120.5(6) |
| C31-C36-H36   | 119.8    |
| C35-C36-H36   | 119.8    |

Short experimental description:

orange crystal (plank), dimensions 0.142 x 0.050 x 0.047 mm<sup>3</sup>, crystal system monoclinic, space group P2<sub>1</sub>/c, Z=4, a=18.331(5) Å, b=4.6232(14) Å, c=19.854(6) Å, alpha=90 deg, beta=107.210(8) deg, gamma=90 deg, V=1607.3(8) Å<sup>3</sup>, rho=1.357 g/cm<sup>3</sup>, T=200(2) K, Theta<sub>max</sub>= 19.766 deg, radiation MoK $\alpha$ , lambda=0.71073 Å, 0.5 deg omega-scans with CCD area detector, covering the asymmetric unit in reciprocal space with a mean redundancy of 3.68 and a completeness of 99.9% to a resolution of 1.05 Å,<sup>[33]</sup> 5655 reflections measured, 1458 unique (R(int)=0.1032), 861 observed (I > 2 $\sigma$ (I)), intensities were corrected for Lorentz and polarization effects, an empirical scaling and absorption correction was applied using SADABS<sup>[34]</sup> based on the Laue symmetry of the reciprocal space, mu=0.09mm<sup>-1</sup>, T<sub>min</sub>=0.84, T<sub>max</sub>=0.96, structure solved with SHELXT-2014 (Sheldrick 2014)<sup>[35]</sup> and refined against F<sup>2</sup> with a Full-matrix least-squares algorithm using the SHELXL-2018/3 (Sheldrick, 2018) software,<sup>[36]</sup> 227 parameters refined, hydrogen atoms were treated using appropriate riding models, goodness of fit 0.98 for observed reflections, final residual values R1(F)=0.058, wR(F<sup>2</sup>)=0.124 for observed reflections, residual electron density -0.24 to 0.20 eÅ<sup>-3</sup>.

CCDC 1915769 contains the supplementary crystallographic data for this paper. These data can be obtained free of charge from The Cambridge Crystallographic Data Centre via <https://www.ccdc.cam.ac.uk/structures/>.

### 2.2.1.3 (2-(*p*-Tolyl)benzofuran-3-yl)(triphenyl- $\lambda^5$ -phosphanyl) gold(I)

A suitable crystal of compound **9** was mounted on top of a cryoloop and transferred into the cold (100 K) nitrogen stream of a Bruker D8 Venture diffractometer. Data collection and reduction was done using the Bruker software suite APEX3.<sup>[37]</sup> The final unit cell was obtained from the xyz centroids of 9673 reflections after integration. A multiscan absorption correction was applied, based on the intensities of symmetry-related reflections measured at different angular settings (SADABS).<sup>[37]</sup> The structures were solved by direct methods using SHELXT,<sup>[35]</sup> and refinement of the structure was performed using SHELXL.<sup>[36]</sup> The hydrogen atoms were generated by geometrical considerations, constrained to idealized geometries and allowed to ride on their carrier atoms with an isotropic displacement parameter related to the equivalent displacement parameter of their carrier atoms. Refinement was done as an inversion twin (twin, basf) and the dataset was cut off at 0.77 Å. EADP was applied for C2 based on C1 and one reflection is omitted. Crystal data and details on data collection and refinement are presented in **Table S 13**.

CCDC 1915734 contains the supplementary crystallographic data for this paper. These data can be obtained free of charge from The Cambridge Crystallographic Data Centre via <https://www.ccdc.cam.ac.uk/structures/>.

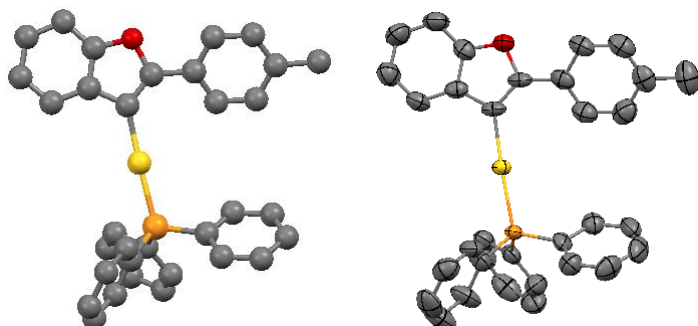

**Table S 13:** Crystallographic data for compound **9**.

|                                                 |                                               |
|-------------------------------------------------|-----------------------------------------------|
| chem formula                                    | C <sub>33</sub> H <sub>26</sub> AuOP          |
| M <sub>r</sub>                                  | 666.47                                        |
| cryst syst                                      | orthorhombic                                  |
| color, habit                                    | colorless, needle                             |
| size (mm)                                       | 0.475 x 0.154 x 0.142                         |
| space group                                     | P2 <sub>1</sub> 2 <sub>1</sub> 2 <sub>1</sub> |
| a (Å)                                           | 15.6906(11)                                   |
| b (Å)                                           | 6.6741(5)                                     |
| c (Å)                                           | 24.8603(17)                                   |
| β (°)                                           | 90                                            |
| V (Å <sup>3</sup> )                             | 2603.4(3)                                     |
| Z                                               | 4                                             |
| ρ <sub>calc</sub> , g.cm <sup>-3</sup>          | 1.700                                         |
| Radiation [Å]                                   | Mo K <sub>α</sub> 0.71073                     |
| μ(Mo K <sub>α</sub> ), mm <sup>-1</sup>         | 5.737                                         |
| F(000)                                          | 1304                                          |
| temp (K)                                        | 100(2)                                        |
| θ range (°)                                     | 3.07 – 27.57                                  |
| data collected (h,k,l)                          | -8:8; -20:20; -32:32                          |
| no. of rflns collected                          | 133480                                        |
| no. of indepndt reflns                          | 5980                                          |
| observed reflns $F_o \geq 2.0$<br>$\sigma(F_o)$ | 5920                                          |
| R(F) (%)                                        | 1.67                                          |
| wR(F <sup>2</sup> ) (%)                         | 4.23                                          |
| GooF                                            | 1.222                                         |
| weighting a,b                                   | 0.154, 3.2811                                 |
| params refined                                  | 321                                           |
| min, max resid dens                             | 0.681, -1.315                                 |

## 2.3) Cartesian Coordinates

|    |              |              |              |                                                     |
|----|--------------|--------------|--------------|-----------------------------------------------------|
| C  | -2.652640000 | -4.579519000 | -1.059965000 | Donor-Acceptor Complex (singlet ground state)       |
| C  | -1.819134000 | -3.454633000 | -1.044262000 | $E_{\text{TPSS-D3(BJ)/def2-SVP/PCM(MeCN)}} =$       |
| C  | -2.411203000 | -2.172750000 | -1.073071000 | <b>-2165.68277547</b>                               |
| C  | -3.826509000 | -2.081167000 | -1.119629000 | $E_{\text{CAM-B3LYP-D3(BJ)/def2-SVPD/PCM(MeCN)}} =$ |
| C  | -4.677474000 | -3.187806000 | -1.142263000 | <b>-2164.35075069</b>                               |
| C  | -4.060976000 | -4.449202000 | -1.109370000 | Excited singlet state energy:                       |
| H  | -4.684340000 | -5.349303000 | -1.120224000 | $E_{\text{CAM-B3LYP-D3(BJ)/def2-SVPD/PCM(MeCN)}} =$ |
| H  | -5.764728000 | -3.074545000 | -1.175195000 | <b>-2164.27771312</b>                               |
| O  | -4.207500000 | -0.768624000 | -1.106711000 | Triplet state energy:                               |
| C  | -3.027871000 | -0.011614000 | -1.035459000 | $E_{\text{CAM-B3LYP-D3(BJ)/def2-SVPD/PCM(MeCN)}} =$ |
| C  | -1.895136000 | -0.815423000 | -1.020985000 | <b>-2164.30349151</b>                               |
| Au | 0.064136000  | -0.305084000 | -0.710874000 |                                                     |
| P  | 2.290089000  | 0.180140000  | -0.182212000 |                                                     |
| C  | 3.536130000  | -0.319729000 | -1.422548000 |                                                     |
| C  | 3.196572000  | -0.204286000 | -2.785978000 |                                                     |
| C  | 4.135390000  | -0.536182000 | -3.771468000 |                                                     |
| C  | 5.410873000  | -0.991790000 | -3.401611000 |                                                     |
| C  | 5.748523000  | -1.115689000 | -2.044949000 |                                                     |
| C  | 4.815651000  | -0.780852000 | -1.053350000 |                                                     |
| H  | 5.079305000  | -0.884018000 | 0.004182000  |                                                     |
| H  | 6.741242000  | -1.475390000 | -1.755962000 |                                                     |
| H  | 6.141435000  | -1.256742000 | -4.172763000 |                                                     |
| H  | 3.868234000  | -0.446522000 | -4.829206000 |                                                     |
| H  | 2.195435000  | 0.140489000  | -3.068666000 |                                                     |
| C  | 2.616862000  | 1.943763000  | 0.183416000  |                                                     |
| C  | 3.920046000  | 2.478084000  | 0.139952000  |                                                     |
| C  | 4.132668000  | 3.824906000  | 0.463848000  |                                                     |
| C  | 3.052100000  | 4.642876000  | 0.831904000  |                                                     |
| C  | 1.752664000  | 4.114909000  | 0.873023000  |                                                     |
| C  | 1.534467000  | 2.769775000  | 0.545832000  |                                                     |
| H  | 0.520979000  | 2.356693000  | 0.564607000  |                                                     |
| H  | 0.905823000  | 4.749838000  | 1.152668000  |                                                     |
| H  | 3.223514000  | 5.694960000  | 1.081405000  |                                                     |
| H  | 5.145836000  | 4.237705000  | 0.426319000  |                                                     |
| H  | 4.765211000  | 1.846002000  | -0.150670000 |                                                     |
| C  | 2.738605000  | -0.722285000 | 1.350281000  |                                                     |
| C  | 2.987305000  | -0.053559000 | 2.563462000  |                                                     |
| C  | 3.215084000  | -0.791456000 | 3.736488000  |                                                     |
| C  | 3.205216000  | -2.192603000 | 3.701933000  |                                                     |
| C  | 2.966563000  | -2.863218000 | 2.489762000  |                                                     |
| C  | 2.724707000  | -2.133749000 | 1.318658000  |                                                     |
| H  | 2.523641000  | -2.659376000 | 0.378516000  |                                                     |
| H  | 2.963974000  | -3.957259000 | 2.457802000  |                                                     |
| H  | 3.384672000  | -2.765226000 | 4.617312000  |                                                     |
| H  | 3.403858000  | -0.265365000 | 4.677590000  |                                                     |
| H  | 2.999352000  | 1.040404000  | 2.593836000  |                                                     |
| C  | -3.232663000 | 1.422348000  | -0.882030000 |                                                     |
| C  | -2.139861000 | 2.323038000  | -0.888526000 |                                                     |

|    |              |              |              |                                                     |
|----|--------------|--------------|--------------|-----------------------------------------------------|
| C  | -2.327312000 | 3.684153000  | -0.651248000 |                                                     |
| C  | -3.613512000 | 4.216094000  | -0.406776000 |                                                     |
| C  | -4.703011000 | 3.323242000  | -0.422670000 |                                                     |
| C  | -4.524228000 | 1.954771000  | -0.656059000 |                                                     |
| H  | -5.385528000 | 1.281515000  | -0.647681000 |                                                     |
| H  | -5.713333000 | 3.706933000  | -0.241197000 |                                                     |
| C  | -3.803443000 | 5.691509000  | -0.147413000 |                                                     |
| H  | -3.484076000 | 6.290561000  | -1.019988000 |                                                     |
| H  | -3.192746000 | 6.024881000  | 0.711214000  |                                                     |
| H  | -4.858136000 | 5.929989000  | 0.064876000  |                                                     |
| H  | -1.458652000 | 4.352412000  | -0.657745000 |                                                     |
| H  | -1.133599000 | 1.932252000  | -1.080276000 |                                                     |
| H  | -0.729149000 | -3.558664000 | -1.006592000 |                                                     |
| H  | -2.211174000 | -5.581300000 | -1.034027000 |                                                     |
| C  | -1.509124000 | -1.306202000 | 2.299324000  |                                                     |
| N  | -0.794732000 | -2.465260000 | 2.301802000  |                                                     |
| N  | -0.172440000 | -3.402592000 | 2.291158000  |                                                     |
| C  | -2.910262000 | -1.371555000 | 2.091640000  |                                                     |
| C  | -3.607936000 | -0.168974000 | 2.063668000  |                                                     |
| C  | -2.929623000 | 1.054985000  | 2.224024000  |                                                     |
| C  | -1.537813000 | 1.092854000  | 2.417811000  |                                                     |
| C  | -0.797044000 | -0.086036000 | 2.448911000  |                                                     |
| H  | 0.282849000  | -0.094661000 | 2.610137000  |                                                     |
| H  | -1.026343000 | 2.050284000  | 2.541813000  |                                                     |
| H  | -3.494352000 | 1.990498000  | 2.191059000  |                                                     |
| H  | -4.687811000 | -0.180796000 | 1.898565000  |                                                     |
| H  | -3.405195000 | -2.334926000 | 1.957648000  |                                                     |
| C  | -2.786413000 | -4.666636000 | -0.974034000 | Donor-Acceptor Complex (triplet state)              |
| C  | -1.901137000 | -3.589627000 | -0.940378000 | $E_{\text{TPSS-D3(BJ)/def2-SVP/PCM(MeCN)}} =$       |
| C  | -2.439378000 | -2.276380000 | -0.988289000 | <b>-2165.65478578</b>                               |
| C  | -3.849809000 | -2.114306000 | -1.066804000 | $E_{\text{CAM-B3LYP-D3(BJ)/def2-SVPD/PCM(MeCN)}} =$ |
| C  | -4.751217000 | -3.166717000 | -1.100534000 | <b>-2164.32967585</b>                               |
| C  | -4.185017000 | -4.458488000 | -1.051858000 |                                                     |
| H  | -4.851836000 | -5.326018000 | -1.074176000 |                                                     |
| H  | -5.830498000 | -3.008561000 | -1.158342000 |                                                     |
| O  | -4.163352000 | -0.774009000 | -1.092456000 |                                                     |
| C  | -2.973877000 | -0.086117000 | -1.022185000 |                                                     |
| C  | -1.847772000 | -0.974580000 | -0.955767000 |                                                     |
| Au | 0.122413000  | -0.533808000 | -0.645220000 |                                                     |
| P  | 2.330825000  | 0.033504000  | -0.115368000 |                                                     |
| C  | 3.617255000  | -0.781556000 | -1.122482000 |                                                     |
| C  | 3.335119000  | -1.066808000 | -2.473917000 |                                                     |
| C  | 4.316486000  | -1.654441000 | -3.282908000 |                                                     |
| C  | 5.575244000  | -1.966825000 | -2.745245000 |                                                     |
| C  | 5.854730000  | -1.690768000 | -1.397660000 |                                                     |
| C  | 4.879751000  | -1.097886000 | -0.583487000 |                                                     |
| H  | 5.096915000  | -0.883929000 | 0.468009000  |                                                     |
| H  | 6.834692000  | -1.938502000 | -0.977421000 |                                                     |
| H  | 6.338829000  | -2.431922000 | -3.377068000 |                                                     |
| H  | 4.095742000  | -1.875143000 | -4.332058000 |                                                     |
| H  | 2.347242000  | -0.830607000 | -2.885484000 |                                                     |

|   |              |              |              |
|---|--------------|--------------|--------------|
| C | 2.624615000  | 1.833727000  | -0.277144000 |
| C | 3.745398000  | 2.349520000  | -0.953140000 |
| C | 3.924705000  | 3.738100000  | -1.049152000 |
| C | 2.993784000  | 4.612369000  | -0.469967000 |
| C | 1.874904000  | 4.099358000  | 0.207428000  |
| C | 1.685319000  | 2.715500000  | 0.299159000  |
| H | 0.808638000  | 2.319250000  | 0.822321000  |
| H | 1.146532000  | 4.778456000  | 0.662083000  |
| H | 3.137413000  | 5.694856000  | -0.546829000 |
| H | 4.796724000  | 4.135271000  | -1.578405000 |
| H | 4.474925000  | 1.669709000  | -1.403929000 |
| C | 2.718561000  | -0.365250000 | 1.627170000  |
| C | 3.419621000  | 0.528757000  | 2.459399000  |
| C | 3.684619000  | 0.177515000  | 3.791086000  |
| C | 3.254340000  | -1.060290000 | 4.293133000  |
| C | 2.556080000  | -1.952555000 | 3.463837000  |
| C | 2.283533000  | -1.607154000 | 2.134647000  |
| H | 1.721543000  | -2.293566000 | 1.493211000  |
| H | 2.209989000  | -2.914170000 | 3.855671000  |
| H | 3.458403000  | -1.328103000 | 5.334881000  |
| H | 4.227182000  | 0.874765000  | 4.437440000  |
| H | 3.751814000  | 1.496105000  | 2.069958000  |
| C | -3.072084000 | 1.341578000  | -0.981213000 |
| C | -1.907056000 | 2.159378000  | -0.963608000 |
| C | -2.014557000 | 3.540757000  | -0.870208000 |
| C | -3.278999000 | 4.170893000  | -0.789928000 |
| C | -4.440436000 | 3.356714000  | -0.827625000 |
| C | -4.348385000 | 1.975403000  | -0.923616000 |
| H | -5.250842000 | 1.360183000  | -0.941012000 |
| H | -5.426505000 | 3.829121000  | -0.775683000 |
| C | -3.392544000 | 5.661900000  | -0.640858000 |
| H | -2.492655000 | 6.176252000  | -1.013650000 |
| H | -3.506195000 | 5.921386000  | 0.429899000  |
| H | -4.281391000 | 6.051616000  | -1.164056000 |
| H | -1.106386000 | 4.151272000  | -0.858383000 |
| H | -0.922253000 | 1.683914000  | -1.024994000 |
| H | -0.819256000 | -3.735768000 | -0.875595000 |
| H | -2.402983000 | -5.690176000 | -0.936779000 |
| C | -1.798265000 | -0.786625000 | 2.342670000  |
| N | -1.056536000 | -2.030784000 | 2.328834000  |
| N | -1.510116000 | -3.127601000 | 2.234161000  |
| C | -3.198442000 | -0.760948000 | 2.201480000  |
| C | -3.852547000 | 0.474160000  | 2.198853000  |
| C | -3.115310000 | 1.664746000  | 2.332583000  |
| C | -1.719294000 | 1.624367000  | 2.477944000  |
| C | -1.051348000 | 0.393134000  | 2.485952000  |
| H | 0.034064000  | 0.325164000  | 2.602271000  |
| H | -1.153164000 | 2.554454000  | 2.584961000  |
| H | -3.632928000 | 2.628608000  | 2.314912000  |
| H | -4.939670000 | 0.513962000  | 2.079506000  |
| H | -3.744755000 | -1.702340000 | 2.090315000  |

|    |              |              |              |                                                     |
|----|--------------|--------------|--------------|-----------------------------------------------------|
| C  | -3.257409000 | -4.767874000 | -0.019743000 | <b>Au Complex 9</b>                                 |
| C  | -2.360175000 | -3.692837000 | -0.021835000 | $E_{\text{TPSS-D3(BJ)/def2-SVP/PCM(MeCN)}} =$       |
| C  | -2.875762000 | -2.377770000 | -0.020858000 | <b>-1824.88613520</b>                               |
| C  | -4.283932000 | -2.205397000 | -0.016383000 | $E_{\text{CAM-B3LYP-D3(BJ)/def2-SVPD/PCM(MeCN)}} =$ |
| C  | -5.198367000 | -3.261287000 | -0.014450000 | <b>-1823.81462986</b>                               |
| C  | -4.656866000 | -4.556843000 | -0.016263000 | <b>Excited singlet state energy:</b>                |
| H  | -5.331727000 | -5.419348000 | -0.014758000 | $E_{\text{CAM-B3LYP-D3(BJ)/def2-SVPD/PCM(MeCN)}} =$ |
| H  | -6.277822000 | -3.084158000 | -0.011419000 | <b>-1823.67190497</b>                               |
| O  | -4.588546000 | -0.873902000 | -0.014968000 | <b>Triplet state energy:</b>                        |
| C  | -3.365706000 | -0.183220000 | -0.019298000 | $E_{\text{CAM-B3LYP-D3(BJ)/def2-SVPD/PCM(MeCN)}} =$ |
| C  | -2.281370000 | -1.051224000 | -0.021833000 | <b>-1823.71303643</b>                               |
| Au | -0.279191000 | -0.611362000 | -0.009874000 |                                                     |
| P  | 1.983055000  | -0.014848000 | 0.009151000  |                                                     |
| C  | 2.932268000  | -0.565282000 | -1.457110000 |                                                     |
| C  | 2.289717000  | -0.534609000 | -2.712315000 |                                                     |
| C  | 2.987494000  | -0.913239000 | -3.866316000 |                                                     |
| C  | 4.323726000  | -1.335122000 | -3.772978000 |                                                     |
| C  | 4.962172000  | -1.376071000 | -2.524185000 |                                                     |
| C  | 4.271280000  | -0.991090000 | -1.365819000 |                                                     |
| H  | 4.771345000  | -1.023248000 | -0.392648000 |                                                     |
| H  | 6.002479000  | -1.708850000 | -2.449205000 |                                                     |
| H  | 4.866038000  | -1.637412000 | -4.674786000 |                                                     |
| H  | 2.485423000  | -0.886223000 | -4.838752000 |                                                     |
| H  | 1.243262000  | -0.215648000 | -2.780025000 |                                                     |
| C  | 2.178901000  | 1.808148000  | 0.046748000  |                                                     |
| C  | 3.112544000  | 2.482291000  | -0.762457000 |                                                     |
| C  | 3.214085000  | 3.880229000  | -0.696335000 |                                                     |
| C  | 2.389541000  | 4.607751000  | 0.174642000  |                                                     |
| C  | 1.457911000  | 3.937302000  | 0.984493000  |                                                     |
| C  | 1.348321000  | 2.542765000  | 0.919155000  |                                                     |
| H  | 0.613851000  | 2.020250000  | 1.542406000  |                                                     |
| H  | 0.809553000  | 4.501835000  | 1.662289000  |                                                     |
| H  | 2.469160000  | 5.698692000  | 0.220611000  |                                                     |
| H  | 3.939654000  | 4.400886000  | -1.329619000 |                                                     |
| H  | 3.755267000  | 1.917148000  | -1.444743000 |                                                     |
| C  | 2.929719000  | -0.625396000 | 1.452146000  |                                                     |
| C  | 3.922460000  | 0.154941000  | 2.075845000  |                                                     |
| C  | 4.641878000  | -0.367385000 | 3.160500000  |                                                     |
| C  | 4.376185000  | -1.665213000 | 3.623432000  |                                                     |
| C  | 3.384917000  | -2.444089000 | 3.004740000  |                                                     |
| C  | 2.658397000  | -1.925784000 | 1.924947000  |                                                     |
| H  | 1.875398000  | -2.525564000 | 1.447080000  |                                                     |
| H  | 3.171830000  | -3.454266000 | 3.368909000  |                                                     |
| H  | 4.938468000  | -2.069018000 | 4.471679000  |                                                     |
| H  | 5.411532000  | 0.242224000  | 3.644852000  |                                                     |
| H  | 4.129628000  | 1.167772000  | 1.715580000  |                                                     |
| C  | -3.497044000 | 1.272829000  | -0.012600000 |                                                     |
| C  | -2.363231000 | 2.118370000  | -0.081666000 |                                                     |
| C  | -2.495409000 | 3.506935000  | -0.064578000 |                                                     |
| C  | -3.763660000 | 4.123536000  | 0.017325000  |                                                     |
| C  | -4.891512000 | 3.283202000  | 0.081002000  |                                                     |



|   |              |              |              |                                                           |
|---|--------------|--------------|--------------|-----------------------------------------------------------|
| C | -4.768153000 | 1.888146000  | 0.066847000  |                                                           |
| H | -5.662529000 | 1.261552000  | 0.120900000  |                                                           |
| H | -5.890470000 | 3.730207000  | 0.145114000  |                                                           |
| C | -3.894338000 | 5.628769000  | 0.030729000  |                                                           |
| H | -3.498029000 | 6.070293000  | -0.902338000 |                                                           |
| H | -3.318448000 | 6.070962000  | 0.864148000  |                                                           |
| H | -4.946472000 | 5.939956000  | 0.136084000  |                                                           |
| H | -1.593327000 | 4.127759000  | -0.117193000 |                                                           |
| H | -1.365855000 | 1.667270000  | -0.149430000 |                                                           |
| H | -1.277443000 | -3.860609000 | -0.024528000 |                                                           |
| H | -2.873637000 | -5.793788000 | -0.020839000 |                                                           |
| C | -0.570613000 | 0.000165000  | 0.000202000  | <b>PhN<sub>2</sub><sup>+</sup></b>                        |
| N | -1.942441000 | 0.000150000  | -0.000043000 | <b>E<sub>TPSS-D3(BJ)/def2-SVP/PCM(MeCN)</sub> =</b>       |
| N | -3.062639000 | -0.000079000 | -0.000227000 | <b>-340.768051002</b>                                     |
| C | 0.095335000  | -1.250489000 | 0.000191000  | <b>E<sub>CAM-B3LYP-D3(BJ)/def2-SVPD/PCM(MeCN)</sub> =</b> |
| C | 1.487128000  | -1.226866000 | -0.000064000 | <b>-340.507590903</b>                                     |
| C | 2.177107000  | -0.000181000 | -0.000112000 | <b>Excited singlet state energy:</b>                      |
| C | 1.487385000  | 1.226711000  | -0.000035000 | <b>E<sub>CAM-B3LYP-D3(BJ)/def2-SVPD/PCM(MeCN)</sub> =</b> |
| C | 0.095626000  | 1.250629000  | 0.000192000  | <b>-340.352044276</b>                                     |
| H | -0.472422000 | 2.182767000  | 0.000291000  | <b>Triplet state energy:</b>                              |
| H | 2.039399000  | 2.169991000  | -0.000267000 | <b>E<sub>CAM-B3LYP-D3(BJ)/def2-SVPD/PCM(MeCN)</sub> =</b> |
| H | 3.270807000  | -0.000288000 | -0.000504000 | <b>-340.394596969</b>                                     |
| H | 2.038896000  | -2.170297000 | -0.000096000 |                                                           |
| H | -0.472930000 | -2.182482000 | 0.000224000  |                                                           |

## 2.4) References

- [1] A. B. Pangborn, M. A. Giardello, R. H. Grubbs, R. K. Rosen, F. J. Timmers, *Organometallics* **1996**, *15*, 1518-1520.
- [2] a) G. R. Fulmer, A. J. M. Miller, N. H. Sherden, H. E. Gottlieb, A. Nudelman, B. M. Stoltz, J. E. Bercaw, K. I. Goldberg, *Organometallics* **2010**, *29*, 2176-2179; b) H. E. Gottlieb, V. Kotlyar, A. Nudelman, *J. Org. Chem.* **1997**, *62*, 7512-7515.
- [3] C. C. Le, M. K. Wismer, Z.-C. Shi, R. Zhang, D. V. Conway, G. Li, P. Vachal, I. W. Davies, D. W. C. MacMillan, *ACS Central Science* **2017**, *3*, 647-653.
- [4] M. G. Auzias, M. Neuburger, H. A. Wegner, *Synlett* **2010**, *2010*, 2443-2448.
- [5] Z. Gonda, F. Béke, O. Tischler, M. Petró, Z. Novák, B. L. Tóth, *Eur. J. Org. Chem.* **2017**, *2017*, 2112-2117.
- [6] Y. Nan, H. Miao, Z. Yang, *Org. Lett.* **2000**, *2*, 297-299.
- [7] S. Cacchi, G. Fabrizi, L. Moro, *Synlett* **1998**, *1998*, 741-745.
- [8] Y. Kondo, F. Shiga, N. Murata, T. Sakamoto, H. Yamanaka, *Tetrahedron* **1994**, *50*, 11803-11812.
- [9] W. Erb, A. Hellal, M. Albin, J. Rouden, J. Blanchet, *Chem. Eur. J.* **2014**, *20*, 6608-6612.
- [10] a) A. D. Lackner, A. Fürstner, *Angew. Chem. Int. Ed.* **2015**, *54*, 12814-12818; b) A. D. Lackner, A. Fürstner, *Angew. Chem.* **2015**, *127*, 13005-13009.
- [11] Z. Y. Tang, Y. Zhang, T. Wang, W. Wang, *Synlett* **2010**, *2010*, 804-808.
- [12] T. Yoshito, S. Tetsuya, M. Masahiro, N. Masakatsu, *Bull. Chem. Soc. Jpn.* **1999**, *72*, 2345-2350.
- [13] W. Zeng, W. Wu, H. Jiang, L. Huang, Y. Sun, Z. Chen, X. Li, *Chem. Commun.* **2013**, *49*, 6611-6613.
- [14] N. T. Hung, M. Hussain, I. Malik, A. Villinger, P. Langer, *Tetrahedron Lett.* **2010**, *51*, 2420-2422.
- [15] Z. Xia, O. Khaled, V. Mouriès-Mansuy, C. Ollivier, L. Fensterbank, *J. Org. Chem.* **2016**, *81*, 7182-7190.
- [16] A. S. K. Hashmi, T. D. Ramamurthi, F. Rominger, *Adv. Synth. Catal.* **2010**, *352*, 971-975.
- [17] M. J. Frisch, G. W. Trucks, H. B. Schlegel, G. E. Scuseria, M. A. Robb, J. R. Cheeseman, G. Scalmani, V. Barone, G. A. Petersson, H. Nakatsuji, X. Li, M. Caricato, A. V. Marenich, J. Bloino, B. G. Janesko, R. Gomperts, B. Mennucci, H. P. Hratchian, J. V. Ortiz, A. F. Izmaylov, J. L. Sonnenberg, Williams, F. Ding, F. Lipparini, F. Egidi, J. Goings, B. Peng, A. Petrone, T. Henderson, D. Ranasinghe, V. G. Zakrzewski, J. Gao, N. Rega, G. Zheng, W. Liang, M. Hada, M. T. Ehara, K. , R. Fukuda, J. Hasegawa, M. Ishida, T. Nakajima, Y. Honda, O. Kitao, H. Nakai, T. Vreven, K. Throssell, J. A. Montgomery Jr., J. E. Peralta, F. Ogliaro, M. J. Bearpark, J. J. Heyd, E. N. Brothers, K. N. Kudin, V. N. Staroverov, T. A. Keith, R. Kobayashi, J. Normand, K. Raghavachari, A. P. Rendell, J. C. Burant, S. S. Iyengar, J. Tomasi, M. Cossi, J. M. Millam, M. Klene, C. Adamo, R. Cammi, J. W. Ochterski, R. L. Martin, K. Morokuma, O. Farkas, J. B. Foresman, and D. J. Fox, *Gaussian 16 Rev. B.01*, **2016**, Gaussian, Inc Wallingford, CT.
- [18] J. Tao, J. P. Perdew, V. N. Staroverov, G. E. Scuseria, *Phys. Rev. Lett.* **2003**, *91*, 146401.
- [19] a) S. Grimme, S. Ehrlich, L. Goerigk, *J. Comp. Chem.* **2011**, *32*, 1456-1465; b) S. Grimme, J. Antony, S. Ehrlich, H. Krieg, *J. Chem. Phys.* **2010**, *132*, 154104.
- [20] F. Weigend, R. Ahlrichs, *Phys. Chem. Chem. Phys.* **2005**, *7*, 3297-3305.
- [21] a) B. I. Dunlap, *J. Mol. Struct. (Theochem)* **2000**, *529*, 37-40; b) B. I. Dunlap, *J. Chem. Phys.* **1983**, *78*, 3140-3142.
- [22] F. Weigend, *Phys. Chem. Chem. Phys.* **2006**, *8*, 1057-1065.
- [23] a) M. E. Casida, C. Jamorski, K. C. Casida, D. R. Salahub, *J. Chem. Phys.* **1998**, *108*, 4439-4449; b) R. E. Stratmann, G. E. Scuseria, M. J. Frisch, *J. Chem. Phys.* **1998**, *109*, 8218-8224; c) R. Bauernschmitt, R. Ahlrichs, *Chem. Phys. Lett.* **1996**, *256*, 454-464.
- [24] T. Yanai, D. Tew, N. Handy, *Chem. Phys. Lett.* **2004**, *393*, 51-57.
- [25] D. Rappoport, F. Furche, *J. Chem. Phys.* **2010**, *133*, 134105.
- [26] D. Andrae, U. Haussermann, M. Dolg, H. Stoll, H. Preuss, *Theor. Chim. Acta* **1990**, *77*, 123-141.
- [27] a) G. Scalmani, M. J. Frisch, B. Mennucci, J. Tomasi, R. Cammi, V. Barone, *J. Chem. Phys.* **2006**, *124*, 094107; b) J. Tomasi, B. Mennucci, R. Cammi, *Chem. Rev.* **2005**, *105*, 2999-3094.
- [28] a) B. P. Pritchard, D. Altarawy, B. Didier, T. D. Gibson, T. L. Windus, **2019**, *Manuscript in Preparation*; b) K. L. Schuchardt, B. T. Didier, T. Elsethagen, L. Sun, V. Gurumoorhi, J. Chase, J. Li, T. L. J. Windus, *Chem. Inf. Model.* **2007**, *47*(3), 1045-1052; c) D. Feller, *J. Comp. Chem.* **1996**, *17*(13), 1571-1586; d) <https://www.basissetexchange.org/>.
- [29] <https://www.chemcraftprog.com>, Chemcraft - graphical software for visualization of quantum chemistry computations.

- 
- [30] a) P. Pracht, S. Grimme, **2019**, *Manuscript in preparation*; b) S. Grimme, *J. Chem. Theory Comput.* **2019**, *15*, 2847–2862; c) S. Grimme, C. Bannwarth, S. Dohm, A. Hansen, J. Pisarek, P. Pracht, J. Seibert, F. Neese, *Angew. Chem. Int. Ed.* **2017**, *56*, 14763–14769; d) S. Grimme, C. Bannwarth, S. Dohm, A. Hansen, J. Pisarek, P. Pracht, J. Seibert, F. Neese, *Angew. Chem.* **2017**, *129*, 14958-14964.
- [31] C. Bannwarth, S. Ehlert, S. Grimme, *J. Chem. Theory Comput.* **2019**, *15* (3), 1652–1671.
- [32] A. Dreuw, M. Head-Gordon, *Chem. Rev.* **2005**, *105*, 4009-4037.
- [33] Bruker, *APEX*, *APEX2*, *SMART*, *SAINT*, *SAINT-Plus* **2007**, Bruker AXS Inc., Madison, Wisconsin, USA.
- [34] L. Krause, R. Herbst-Irmer, G. M. Sheldrick, D. Stalke, *Journal of Applied Crystallography* **2015**, *48*, 3-10.
- [35] G. Sheldrick, *Acta Crystallographica Section A* **2015**, *71*, 3-8.
- [36] G. Sheldrick, *Acta Crystallographica Section C* **2015**, *71*, 3-8.
- [37] Bruker, *APEX3*, *Saint* and *SADABS*. **2016**, Bruker AXS Inc., Madison, Wisconsin, USA.
